# Supplementary material
Source: PubMed Central journal article supplement (PMC7678169)
Supplement: mmc1.pdf [file mmc1.pdf]

1 NA vs GA

1.21 Mortality

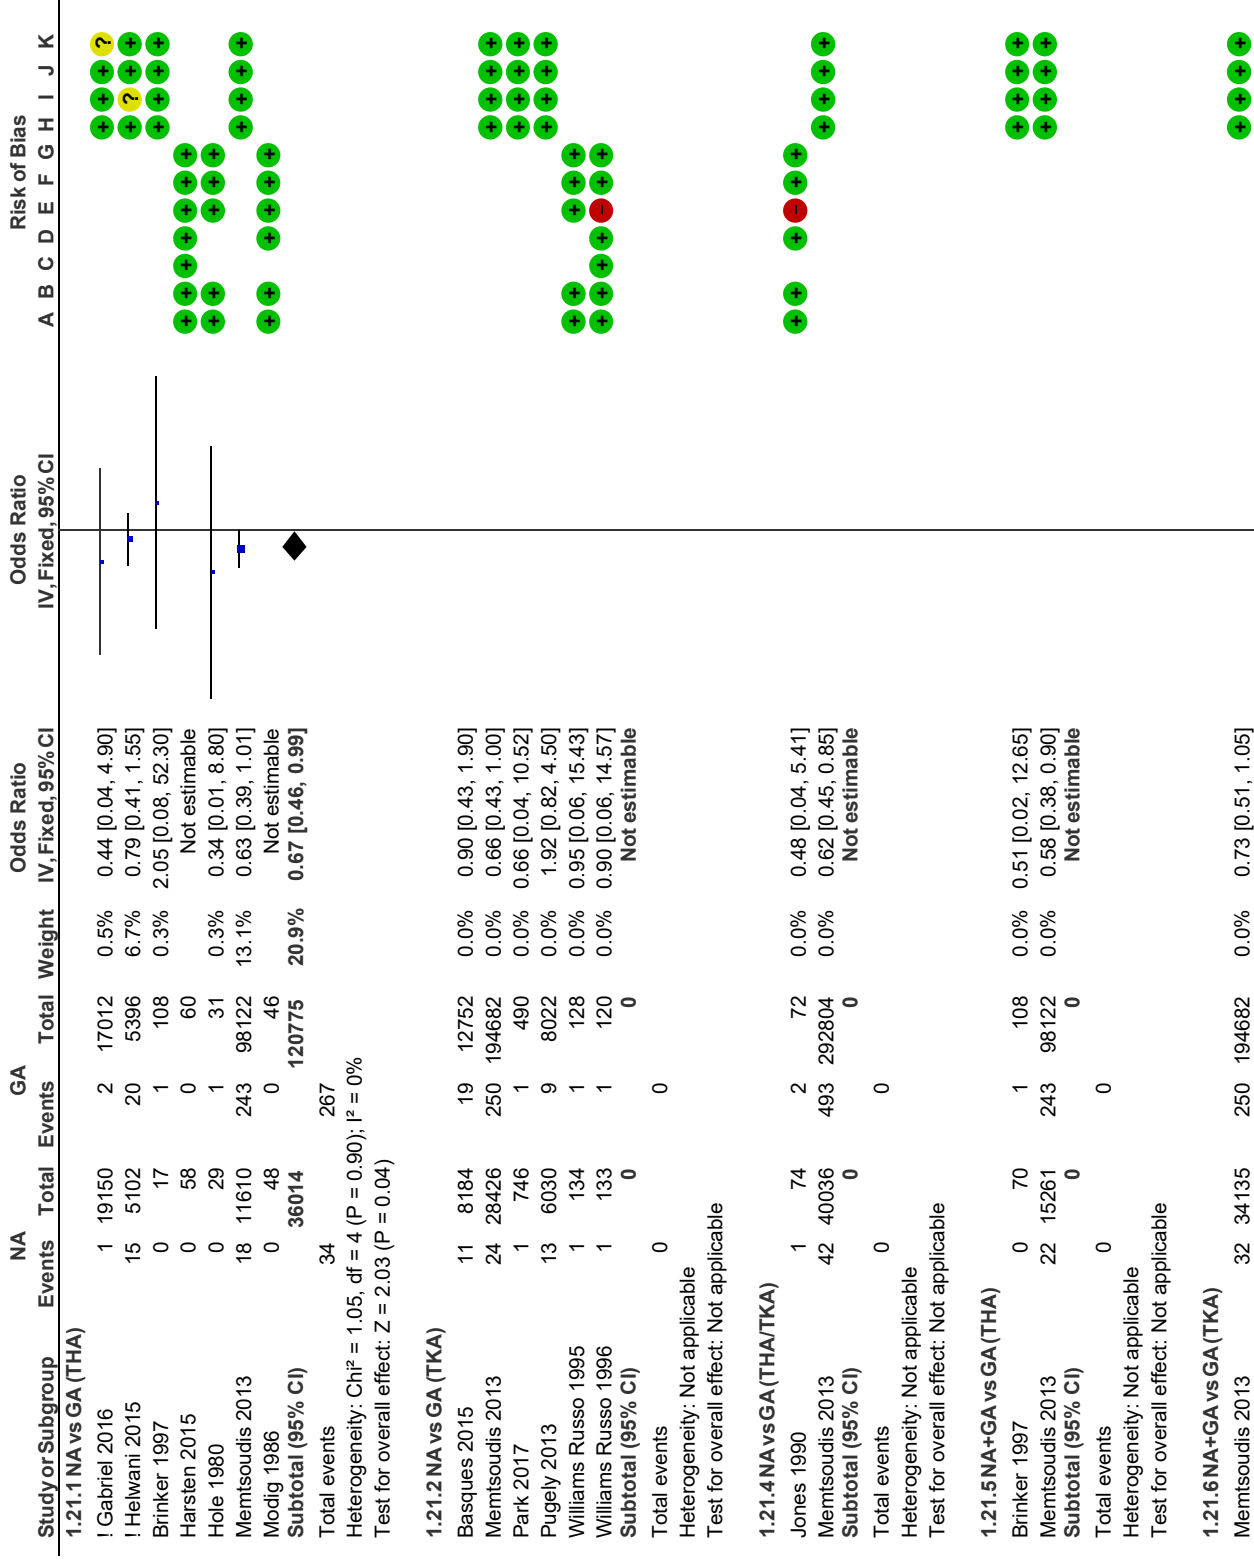

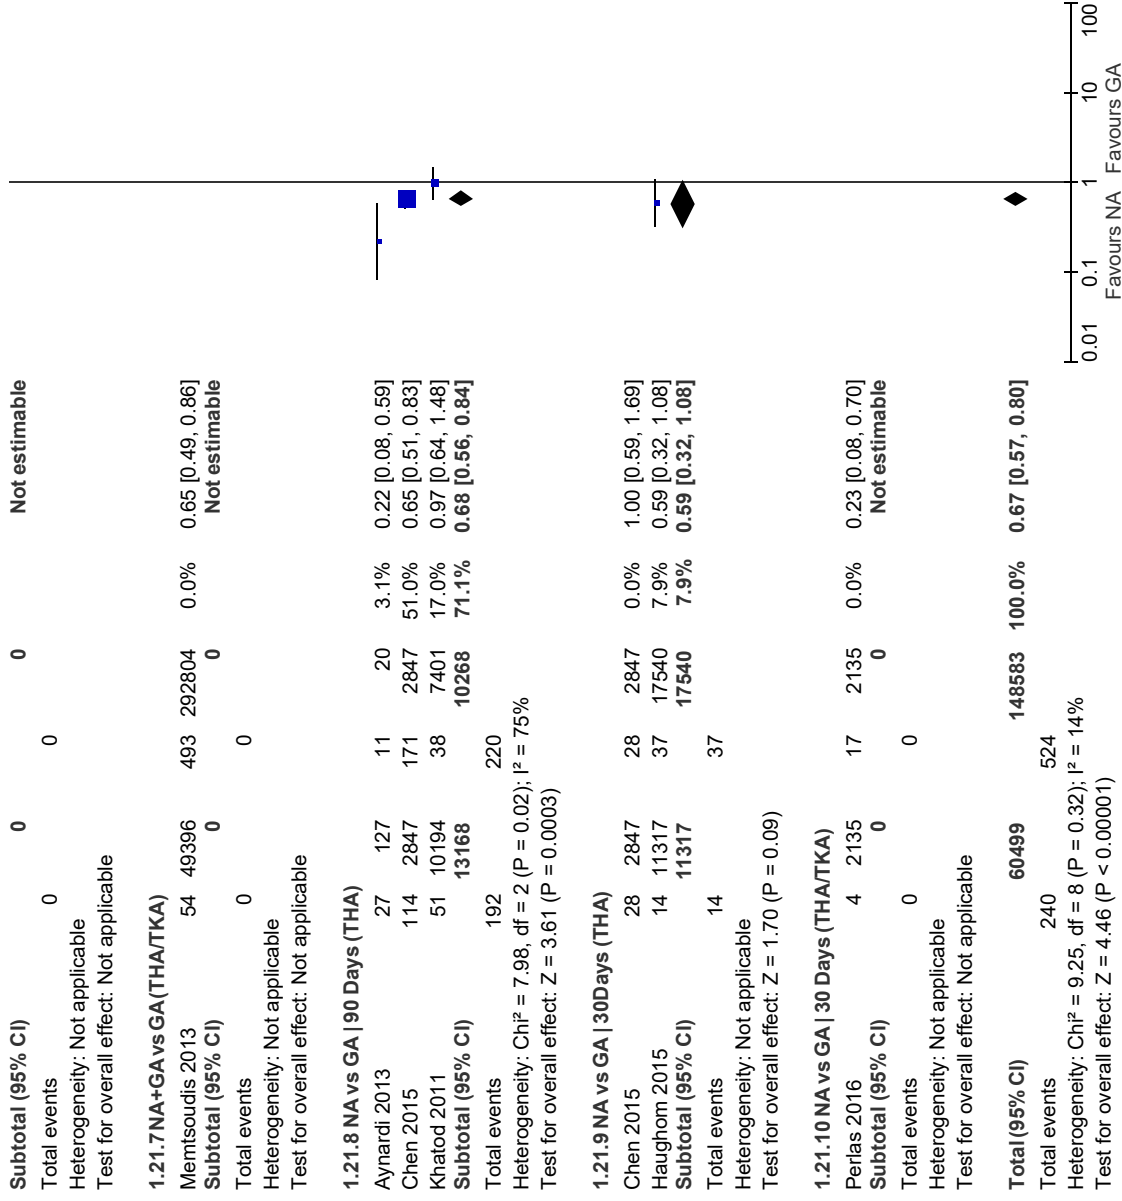

- (F) Selective reporting (reporting bias)
- (G) Other bias
- (H) Observational Study: Incomplete follow-up
- (I) Observational Study: Failure to develop and apply appropriate eligibility criteria
- (J) Observational Study: Flawed measurement of exposure or outcome
- (K) Observational Study: Failure to adequately control for confounding
