# Supplementary material
Source: PubMed Central journal article supplement (PMC7678169)
Supplement: mmc2.pdf [file mmc2.pdf]

1 NA vs GA

1.1 Blood loss

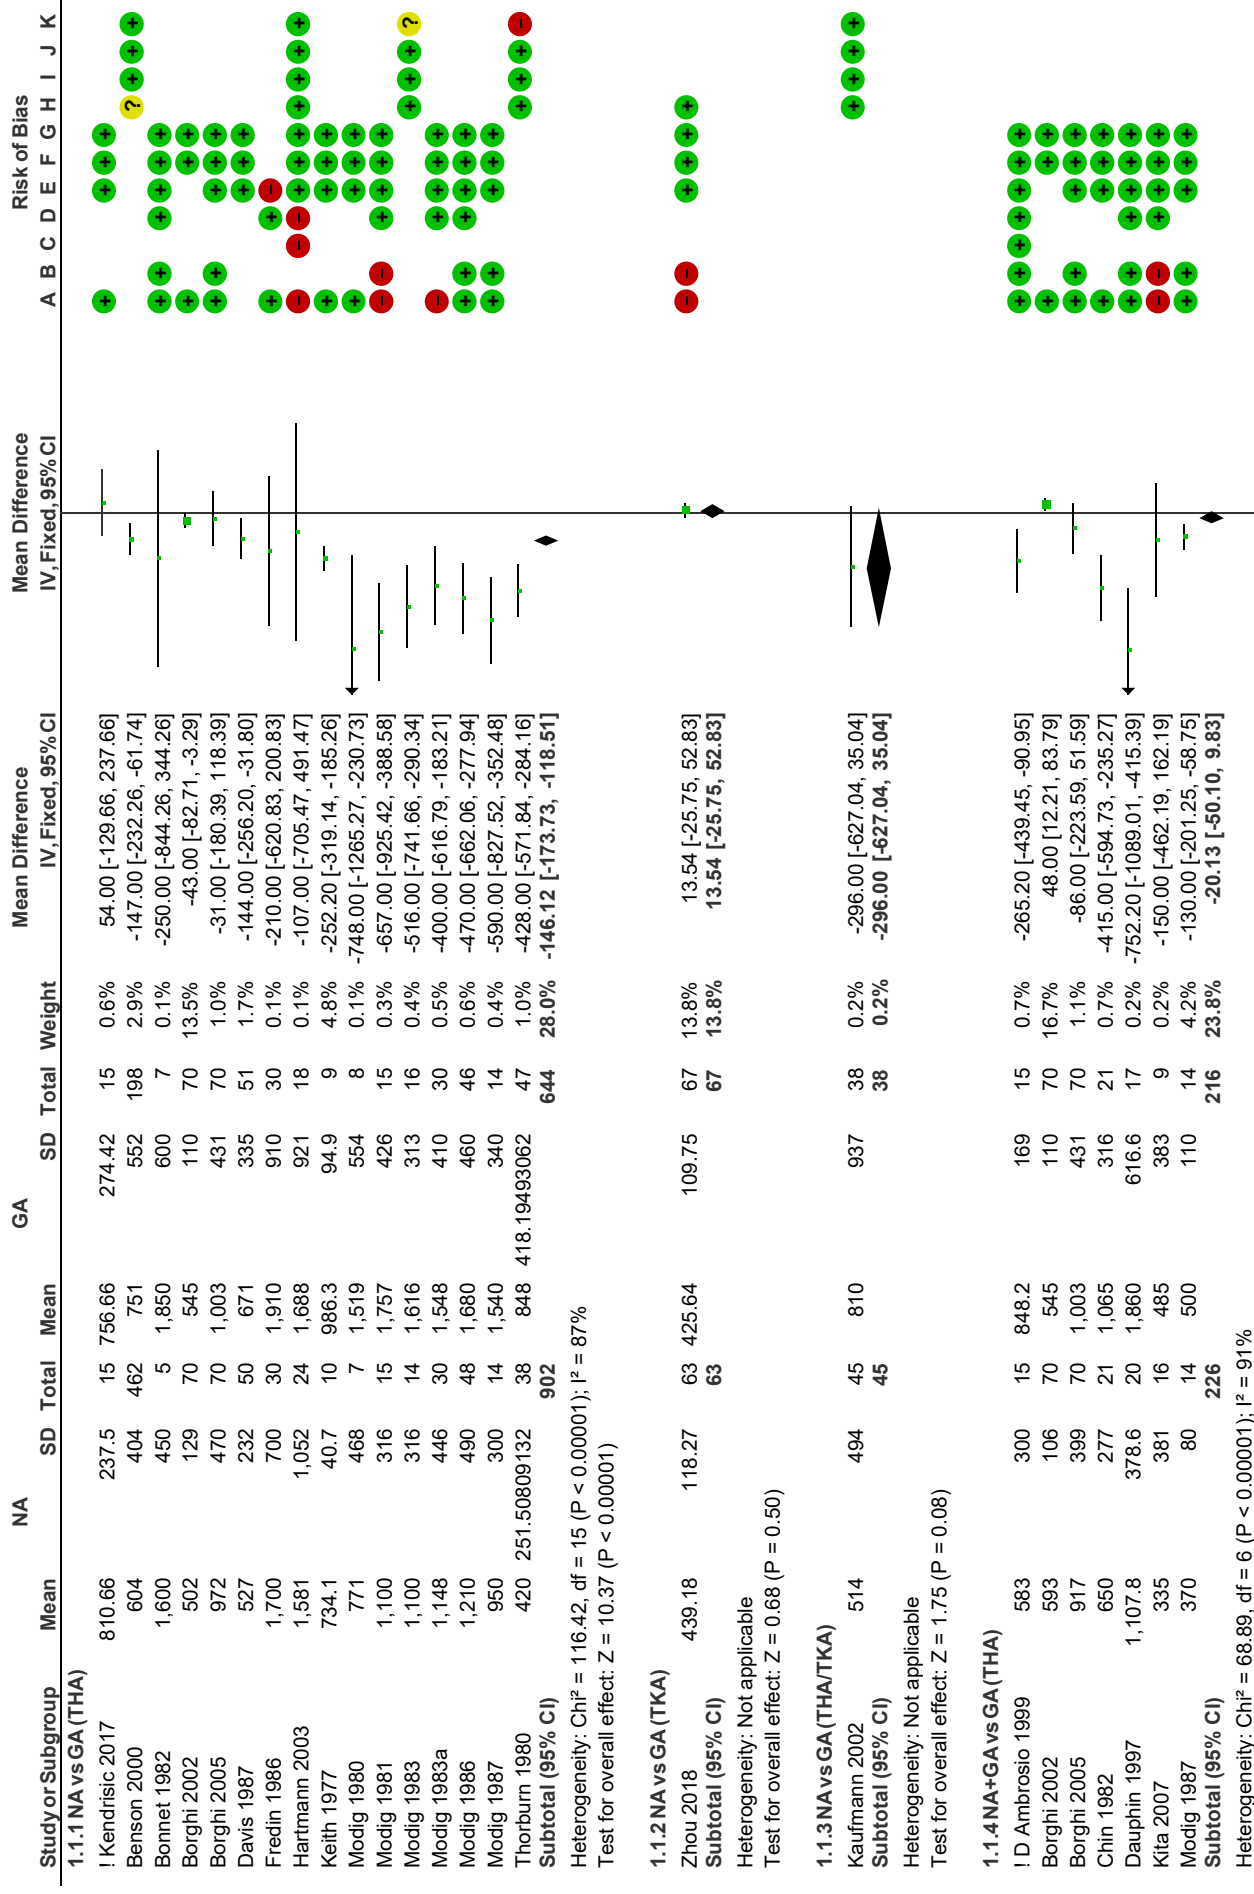

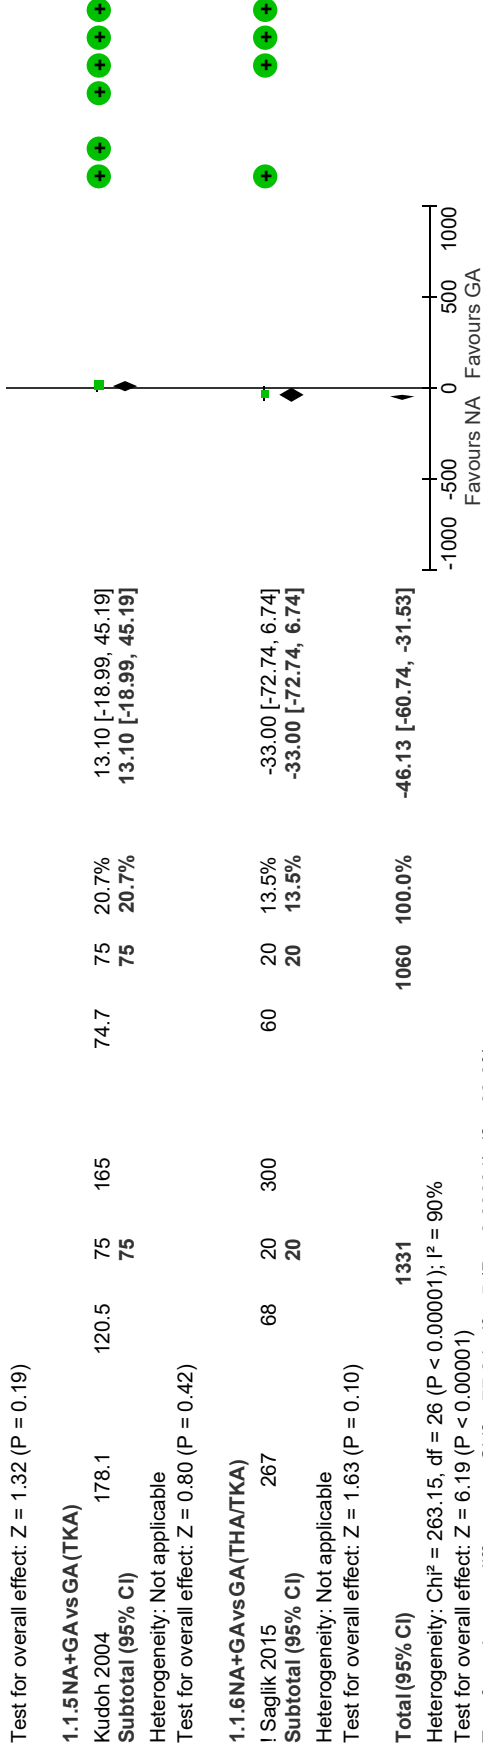

Test for overall effect: Z = 1.32 (P = 0.19)

Heterogeneity: Chi<sup>2</sup> = 263.15, df = 26 (P < 0.00001); I<sup>2</sup> = 90%

Test for overall effect: Z = 6.19 (P < 0.00001)

Test for subgroup differences: Chi<sup>2</sup> = 77.84, df = 5 (P < 0.00001), I<sup>2</sup> = 93.6%

**Risk of bias legend**

- (A) Random sequence generation (selection bias)
- (B) Allocation concealment (selection bias)
- (C) Blinding of participants and personnel (performance bias)
- (D) Blinding of outcome assessment (detection bias)
- (E) Incomplete outcome data (attrition bias)
- (F) Selective reporting (reporting bias)
- (G) Other bias
- (H) Observational Study: Incomplete follow-up
- (I) Observational Study: Failure to develop and apply appropriate eligibility criteria
- (J) Observational Study: Flawed measurement of exposure or outcome
- (K) Observational Study: Failure to adequately control for confounding

1.3 Length of hospital stay (LOS)

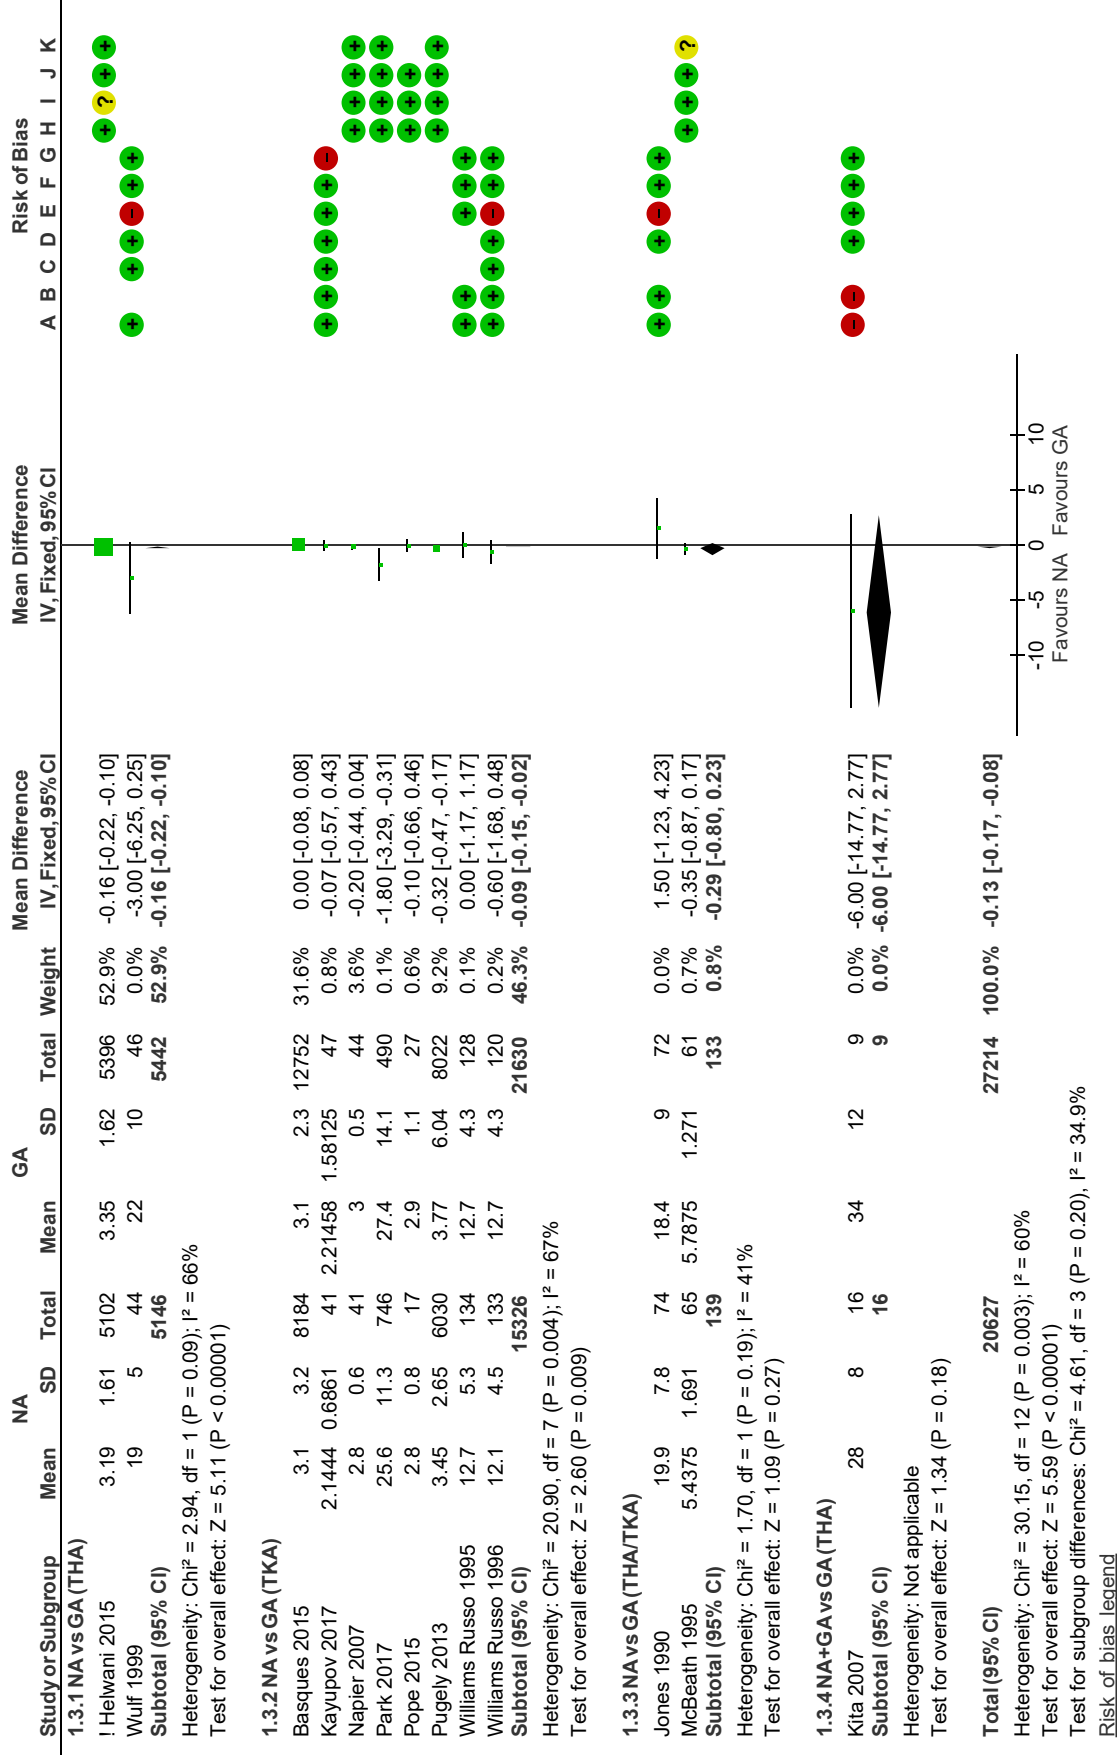

Risk of bias legend

- (A) Random sequence generation (selection bias)
- (B) Allocation concealment (selection bias)
- (C) Blinding of participants and personnel (performance bias)
- (D) Blinding of outcome assessment (detection bias)
- (E) Incomplete outcome data (attrition bias)

- (F) Selective reporting (reporting bias)
- (G) Other bias
- (H) Observational Study: Incomplete follow-up
- (I) Observational Study: Failure to develop and apply appropriate eligibility criteria
- (J) Observational Study: Flawed measurement of exposure or outcome
- (K) Observational Study: Failure to adequately control for confounding

1.5 Blood transfusion, ml

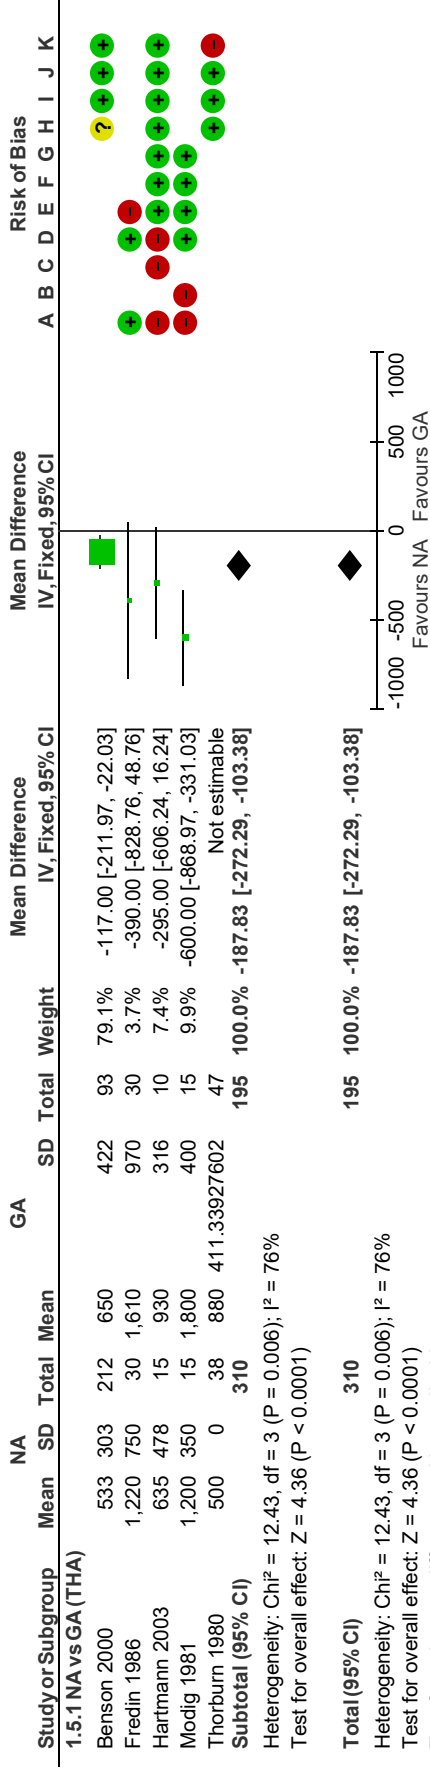

Risk of bias legend

- (A) Random sequence generation (selection bias)
- (B) Allocation concealment (selection bias)
- (C) Blinding of participants and personnel (performance bias)
- (D) Blinding of outcome assessment (detection bias)
- (E) Incomplete outcome data (attrition bias)
- (F) Selective reporting (reporting bias)
- (G) Other bias
- (H) Observational Study: Incomplete follow-up
- (I) Observational Study: Failure to develop and apply appropriate eligibility criteria
- (J) Observational Study: Flawed measurement of exposure or outcome
- (K) Observational Study: Failure to adequately control for confounding

1.10 Total Cost/case (Anesthesia+recovery: drugs and supplies; personal costs not included)

| Study or Subgroup | NA   |    | GA   |    | Total | Weight | Mean Difference<br>IV, Fixed, 95% CI | Risk of Bias |   |   |   |   |   |   |   |   |   |   |
|-------------------|------|----|------|----|-------|--------|--------------------------------------|--------------|---|---|---|---|---|---|---|---|---|---|
|                   | Mean | SD | Mean | SD |       |        |                                      | A            | B | C | D | E | F | G | H | I | J | K |

|                                  |      |           |    |      |    |           |               |                                |   |   |   |   |   |   |   |
|----------------------------------|------|-----------|----|------|----|-----------|---------------|--------------------------------|---|---|---|---|---|---|---|
| <b>1.10.1 NA vs GA (THA/TKA)</b> |      |           |    |      |    |           |               |                                |   |   |   |   |   |   |   |
| Gonano 2006                      | 46.3 | 11        | 20 | 89.6 | 13 | 20        | 100.0%        | -43.30 [-50.76, -35.84]        | + | + | + | + | + | + | + |
| <b>Subtotal (95% CI)</b>         |      | <b>20</b> |    |      |    | <b>20</b> | <b>100.0%</b> | <b>-43.30 [-50.76, -35.84]</b> |   |   |   |   |   |   |   |

Heterogeneity: Not applicable  
 Test for overall effect: Z = 11.37 (P < 0.00001)

|                       |  |           |  |  |  |           |               |                                |  |  |  |  |  |  |  |
|-----------------------|--|-----------|--|--|--|-----------|---------------|--------------------------------|--|--|--|--|--|--|--|
| <b>Total (95% CI)</b> |  | <b>20</b> |  |  |  | <b>20</b> | <b>100.0%</b> | <b>-43.30 [-50.76, -35.84]</b> |  |  |  |  |  |  |  |
|-----------------------|--|-----------|--|--|--|-----------|---------------|--------------------------------|--|--|--|--|--|--|--|

Heterogeneity: Not applicable

Test for overall effect: Z = 11.37 (P < 0.00001)

Test for subgroup differences: Not applicable

Risk of bias legend

- (A) Random sequence generation (selection bias)
- (B) Allocation concealment (selection bias)
- (C) Blinding of participants and personnel (performance bias)
- (D) Blinding of outcome assessment (detection bias)
- (E) Incomplete outcome data (attrition bias)
- (F) Selective reporting (reporting bias)
- (G) Other bias
- (H) Observational Study: Incomplete follow-up
- (I) Observational Study: Failure to develop and apply appropriate eligibility criteria
- (J) Observational Study: Flawed measurement of exposure or outcome
- (K) Observational Study: Failure to adequately control for confounding

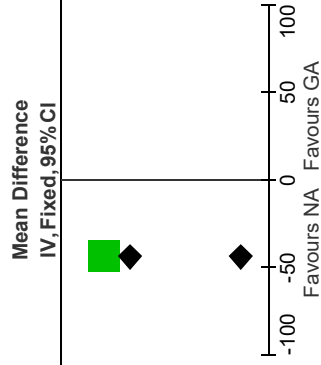

1.21 Mortality

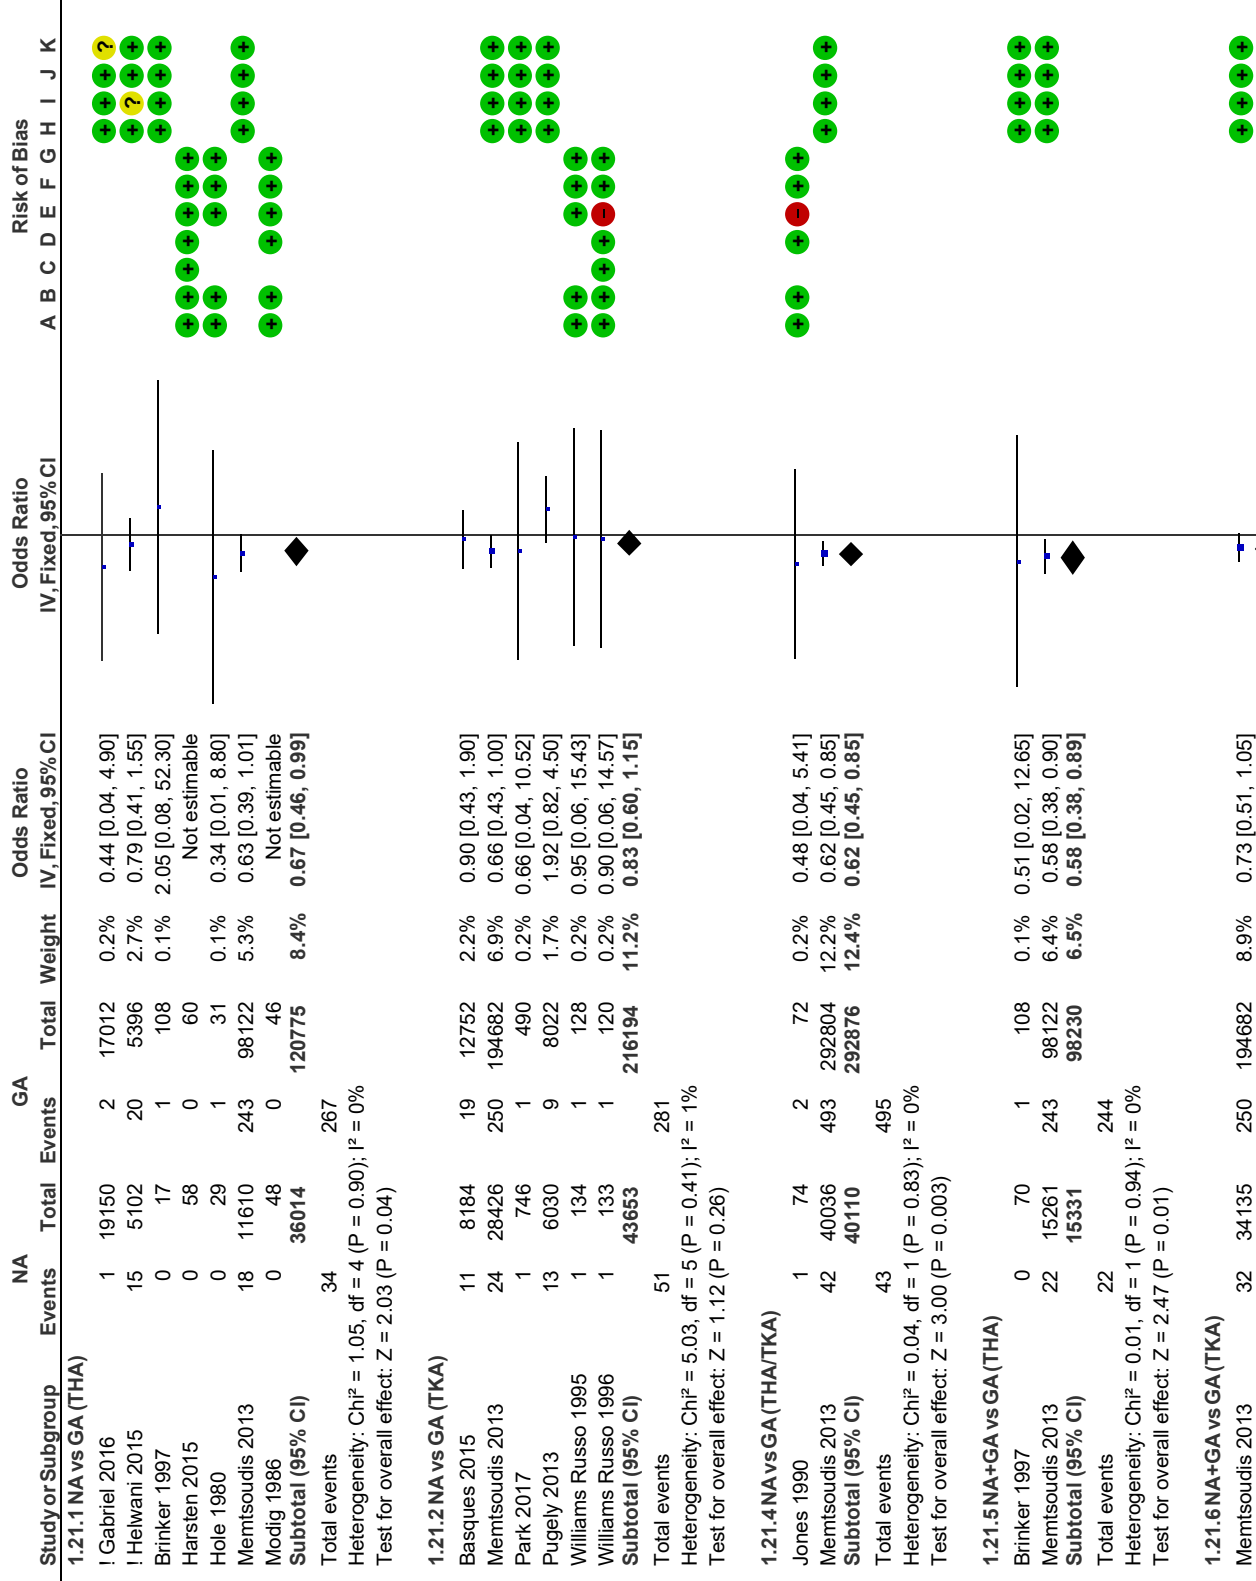



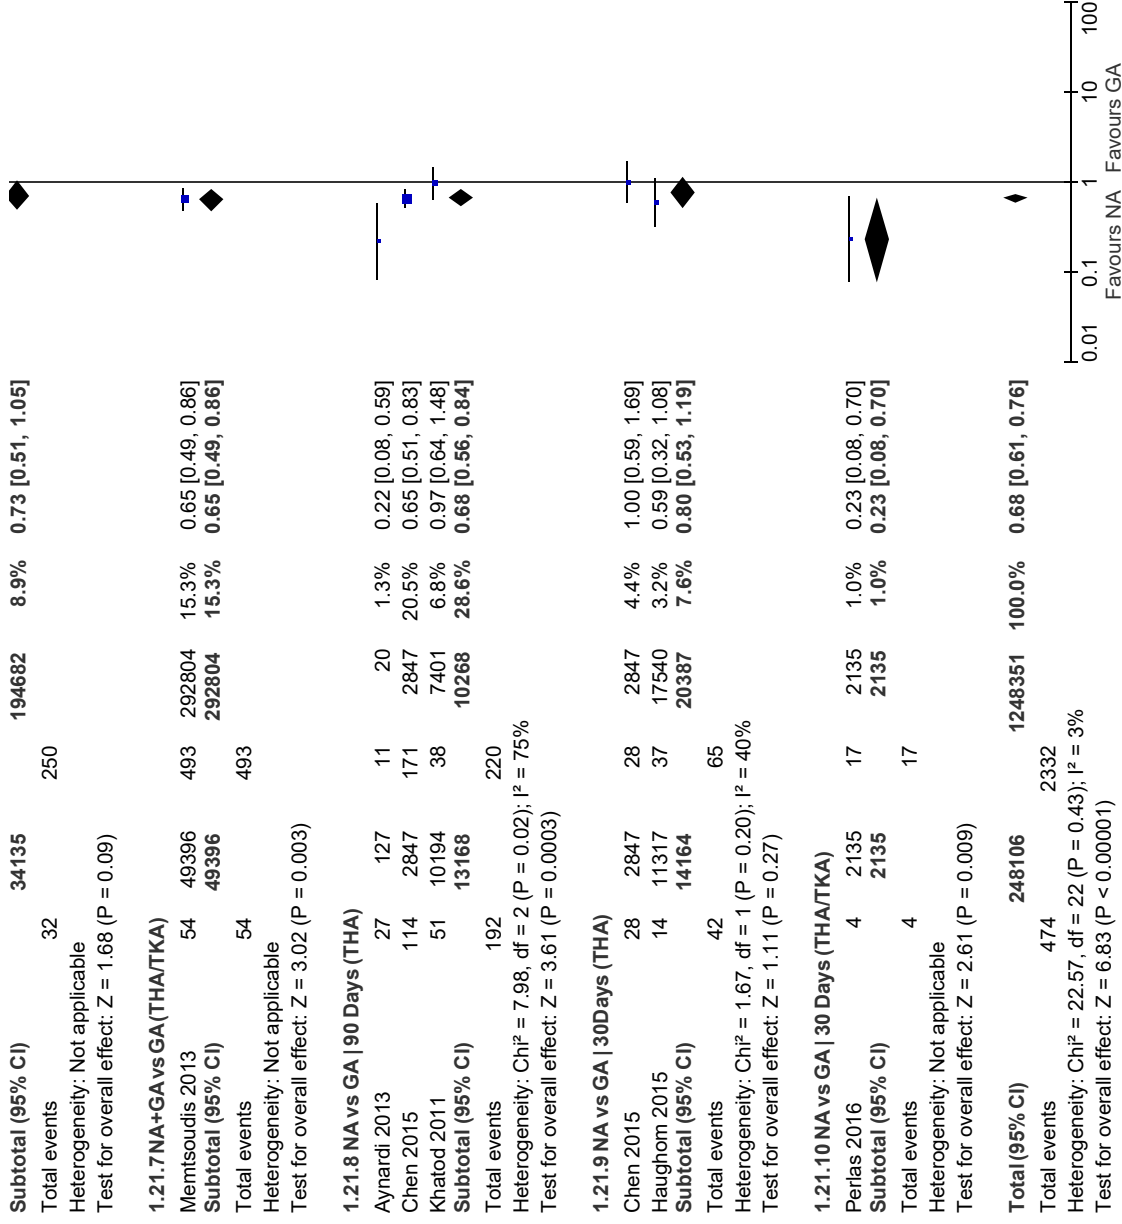

- (F) Selective reporting (reporting bias)
- (G) Other bias
- (H) Observational Study: Incomplete follow-up
- (I) Observational Study: Failure to develop and apply appropriate eligibility criteria
- (J) Observational Study: Flawed measurement of exposure or outcome
- (K) Observational Study: Failure to adequately control for confounding

1.32 Cardiac incl. MI

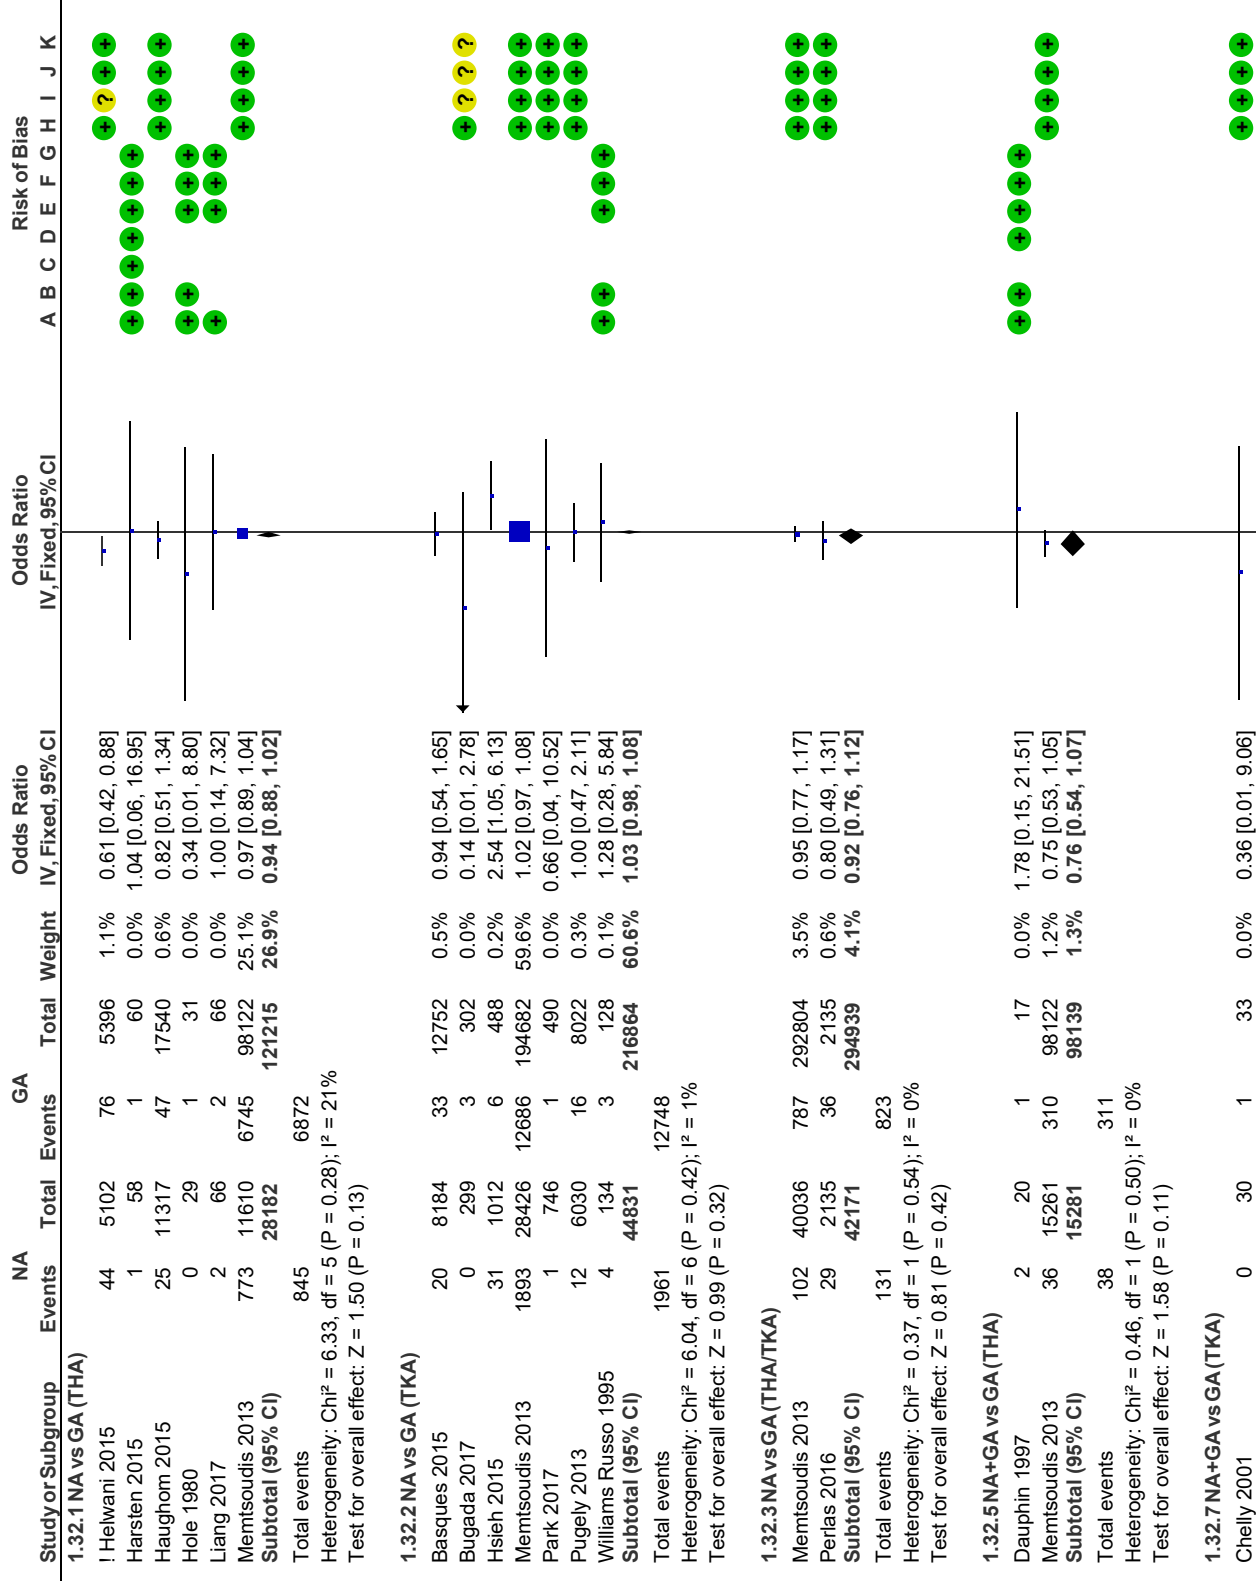

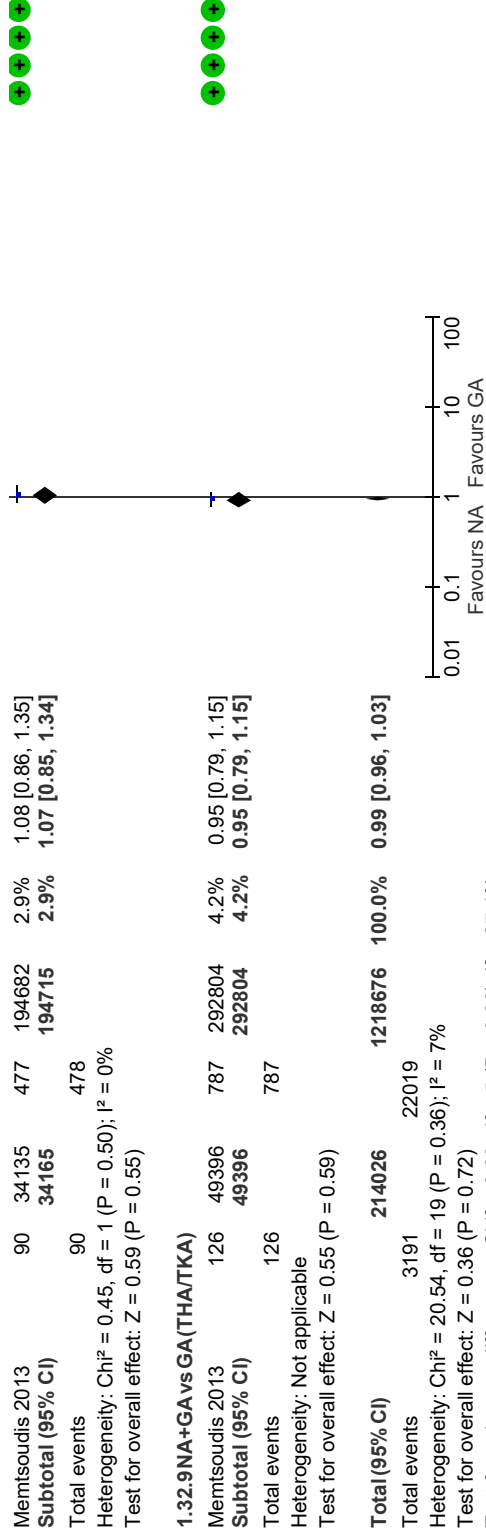

- Risk of bias legend**
- (A) Random sequence generation (selection bias)
  - (B) Allocation concealment (selection bias)
  - (C) Blinding of participants and personnel (performance bias)
  - (D) Blinding of outcome assessment (detection bias)
  - (E) Incomplete outcome data (attrition bias)
  - (F) Selective reporting (reporting bias)
  - (G) Other bias
  - (H) Observational Study: Incomplete follow-up
  - (I) Observational Study: Failure to develop and apply appropriate eligibility criteria
  - (J) Observational Study: Flawed measurement of exposure or outcome
  - (K) Observational Study: Failure to adequately control for confounding

1.33 Cardiac excl. MI

| Study or Subgroup                                       | NA           |       | GA            |        | Total Weight | Odds Ratio<br>IV, Fixed, 95% CI | Odds Ratio<br>IV, Fixed, 95% CI | Risk of Bias |   |   |   |   |   |   |   |   |   |   |   |  |  |  |  |  |  |  |  |  |  |  |  |  |
|---------------------------------------------------------|--------------|-------|---------------|--------|--------------|---------------------------------|---------------------------------|--------------|---|---|---|---|---|---|---|---|---|---|---|--|--|--|--|--|--|--|--|--|--|--|--|--|
|                                                         | Events       | Total | Events        | Total  |              |                                 |                                 | A            | B | C | D | E | F | G | H | I | J | K |   |  |  |  |  |  |  |  |  |  |  |  |  |  |
| <b>1.33.1 NA vs GA (THA)</b>                            |              |       |               |        |              |                                 |                                 |              |   |   |   |   |   |   |   |   |   |   |   |  |  |  |  |  |  |  |  |  |  |  |  |  |
| Gabriel 2016                                            | 3            | 9625  | 15            | 18079  | 0.0%         | 0.38 [0.11, 1.30]               | 0.38 [0.11, 1.30]               |              |   |   |   |   |   |   |   |   | + | + | + |  |  |  |  |  |  |  |  |  |  |  |  |  |
| Harsten 2015                                            | 1            | 58    | 1             | 60     | 0.0%         | 1.04 [0.06, 16.95]              | 1.04 [0.06, 16.95]              |              |   |   |   |   |   |   |   |   | + | + | + |  |  |  |  |  |  |  |  |  |  |  |  |  |
| Haughom 2015                                            | 6            | 11317 | 19            | 17540  | 0.0%         | 0.49 [0.20, 1.23]               | 0.49 [0.20, 1.23]               |              |   |   |   |   |   |   |   |   | + | + | + |  |  |  |  |  |  |  |  |  |  |  |  |  |
| Hole 1980                                               | 0            | 29    | 1             | 31     | 0.0%         | 0.34 [0.01, 8.80]               | 0.34 [0.01, 8.80]               |              |   |   |   |   |   |   |   |   | + | + | + |  |  |  |  |  |  |  |  |  |  |  |  |  |
| Memtsoudis 2013                                         | 736          | 11610 | 6435          | 98122  | 6.5%         | 0.96 [0.89, 1.04]               | 0.96 [0.89, 1.04]               |              |   |   |   |   |   |   |   |   | + | + | + |  |  |  |  |  |  |  |  |  |  |  |  |  |
| <b>Subtotal (95% CI)</b>                                | <b>32639</b> |       | <b>133832</b> |        | <b>6.6%</b>  | <b>0.96 [0.88, 1.03]</b>        |                                 |              |   |   |   |   |   |   |   |   | + | + | + |  |  |  |  |  |  |  |  |  |  |  |  |  |
| Total events: 6471                                      |              |       |               |        |              |                                 |                                 |              |   |   |   |   |   |   |   |   |   |   |   |  |  |  |  |  |  |  |  |  |  |  |  |  |
| Heterogeneity: Chi² = 4.66, df = 4 (P = 0.32); I² = 14% |              |       |               |        |              |                                 |                                 |              |   |   |   |   |   |   |   |   |   |   |   |  |  |  |  |  |  |  |  |  |  |  |  |  |
| Test for overall effect: Z = 1.14 (P = 0.25)            |              |       |               |        |              |                                 |                                 |              |   |   |   |   |   |   |   |   |   |   |   |  |  |  |  |  |  |  |  |  |  |  |  |  |
| <b>1.33.2 NA vs GA (TKA)</b>                            |              |       |               |        |              |                                 |                                 |              |   |   |   |   |   |   |   |   |   |   |   |  |  |  |  |  |  |  |  |  |  |  |  |  |
| Basques 2015                                            | 2            | 8184  | 15            | 12752  | 0.0%         | 0.21 [0.05, 0.91]               | 0.21 [0.05, 0.91]               |              |   |   |   |   |   |   |   |   | + | + | + |  |  |  |  |  |  |  |  |  |  |  |  |  |
| Memtsoudis 2013                                         | 1828         | 28426 | 12209         | 194682 | 15.8%        | 1.03 [0.98, 1.08]               | 1.03 [0.98, 1.08]               |              |   |   |   |   |   |   |   |   | + | + | + |  |  |  |  |  |  |  |  |  |  |  |  |  |
| Park 2017                                               | 1            | 746   | 1             | 490    | 0.0%         | 0.66 [0.04, 10.52]              | 0.66 [0.04, 10.52]              |              |   |   |   |   |   |   |   |   | + | + | + |  |  |  |  |  |  |  |  |  |  |  |  |  |
| Pugely 2013                                             | 4            | 6030  | 7             | 8022   | 0.0%         | 0.76 [0.22, 2.60]               | 0.76 [0.22, 2.60]               |              |   |   |   |   |   |   |   |   | + | + | + |  |  |  |  |  |  |  |  |  |  |  |  |  |
| <b>Subtotal (95% CI)</b>                                | <b>43386</b> |       | <b>215946</b> |        | <b>15.8%</b> | <b>1.02 [0.97, 1.08]</b>        |                                 |              |   |   |   |   |   |   |   |   | + | + | + |  |  |  |  |  |  |  |  |  |  |  |  |  |
| Total events: 12232                                     |              |       |               |        |              |                                 |                                 |              |   |   |   |   |   |   |   |   |   |   |   |  |  |  |  |  |  |  |  |  |  |  |  |  |
| Heterogeneity: Chi² = 4.83, df = 3 (P = 0.18); I² = 38% |              |       |               |        |              |                                 |                                 |              |   |   |   |   |   |   |   |   |   |   |   |  |  |  |  |  |  |  |  |  |  |  |  |  |
| Test for overall effect: Z = 0.94 (P = 0.35)            |              |       |               |        |              |                                 |                                 |              |   |   |   |   |   |   |   |   |   |   |   |  |  |  |  |  |  |  |  |  |  |  |  |  |
| <b>1.33.3 NA vs GA (THA/TKA)</b>                        |              |       |               |        |              |                                 |                                 |              |   |   |   |   |   |   |   |   |   |   |   |  |  |  |  |  |  |  |  |  |  |  |  |  |
| Memtsoudis 2013                                         | 2564         | 40036 | 18644         | 292804 | 22.3%        | 1.01 [0.96, 1.05]               | 1.01 [0.96, 1.05]               |              |   |   |   |   |   |   |   |   | + | + | + |  |  |  |  |  |  |  |  |  |  |  |  |  |
| <b>Subtotal (95% CI)</b>                                | <b>40036</b> |       | <b>292804</b> |        | <b>22.3%</b> | <b>1.01 [0.96, 1.05]</b>        |                                 |              |   |   |   |   |   |   |   |   | + | + | + |  |  |  |  |  |  |  |  |  |  |  |  |  |
| Total events: 18644                                     |              |       |               |        |              |                                 |                                 |              |   |   |   |   |   |   |   |   |   |   |   |  |  |  |  |  |  |  |  |  |  |  |  |  |
| Heterogeneity: Not applicable                           |              |       |               |        |              |                                 |                                 |              |   |   |   |   |   |   |   |   |   |   |   |  |  |  |  |  |  |  |  |  |  |  |  |  |
| Test for overall effect: Z = 0.28 (P = 0.78)            |              |       |               |        |              |                                 |                                 |              |   |   |   |   |   |   |   |   |   |   |   |  |  |  |  |  |  |  |  |  |  |  |  |  |
| <b>1.33.4 NA+GA vs GA (THA)</b>                         |              |       |               |        |              |                                 |                                 |              |   |   |   |   |   |   |   |   |   |   |   |  |  |  |  |  |  |  |  |  |  |  |  |  |
| Memtsoudis 2013                                         | 1014         | 15261 | 6435          | 98122  | 8.7%         | 1.01 [0.95, 1.09]               | 1.01 [0.95, 1.09]               |              |   |   |   |   |   |   |   |   | + | + | + |  |  |  |  |  |  |  |  |  |  |  |  |  |
| <b>Subtotal (95% CI)</b>                                | <b>15261</b> |       | <b>98122</b>  |        | <b>8.7%</b>  | <b>1.01 [0.95, 1.09]</b>        |                                 |              |   |   |   |   |   |   |   |   | + | + | + |  |  |  |  |  |  |  |  |  |  |  |  |  |
| Total events: 6435                                      |              |       |               |        |              |                                 |                                 |              |   |   |   |   |   |   |   |   |   |   |   |  |  |  |  |  |  |  |  |  |  |  |  |  |
| Heterogeneity: Not applicable                           |              |       |               |        |              |                                 |                                 |              |   |   |   |   |   |   |   |   |   |   |   |  |  |  |  |  |  |  |  |  |  |  |  |  |
| Test for overall effect: Z = 0.40 (P = 0.69)            |              |       |               |        |              |                                 |                                 |              |   |   |   |   |   |   |   |   |   |   |   |  |  |  |  |  |  |  |  |  |  |  |  |  |
| <b>1.33.5 NA+GA vs GA (TKA)</b>                         |              |       |               |        |              |                                 |                                 |              |   |   |   |   |   |   |   |   |   |   |   |  |  |  |  |  |  |  |  |  |  |  |  |  |
| Memtsoudis 2013                                         | 2273         | 34135 | 12209         | 194682 | 18.9%        | 1.07 [1.02, 1.12]               | 1.07 [1.02, 1.12]               |              |   |   |   |   |   |   |   |   | + | + | + |  |  |  |  |  |  |  |  |  |  |  |  |  |
| <b>Subtotal (95% CI)</b>                                | <b>34135</b> |       | <b>194682</b> |        | <b>18.9%</b> | <b>1.07 [1.02, 1.12]</b>        |                                 |              |   |   |   |   |   |   |   |   | + | + | + |  |  |  |  |  |  |  |  |  |  |  |  |  |
| Total events: 12209                                     |              |       |               |        |              |                                 |                                 |              |   |   |   |   |   |   |   |   |   |   |   |  |  |  |  |  |  |  |  |  |  |  |  |  |
| Heterogeneity: Not applicable                           |              |       |               |        |              |                                 |                                 |              |   |   |   |   |   |   |   |   |   |   |   |  |  |  |  |  |  |  |  |  |  |  |  |  |
| Test for overall effect: Z = 2.71 (P = 0.007)           |              |       |               |        |              |                                 |                                 |              |   |   |   |   |   |   |   |   |   |   |   |  |  |  |  |  |  |  |  |  |  |  |  |  |
| <b>1.33.6 NA+GA vs GA (THA/TKA)</b>                     |              |       |               |        |              |                                 |                                 |              |   |   |   |   |   |   |   |   |   |   |   |  |  |  |  |  |  |  |  |  |  |  |  |  |

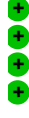

Memisoudis 2013 3287 49396 18644 282804 27.6% 1.01 [0.97, 1.05]  
 Subtotal (95% CI) 49396 282804 27.6% 1.01 [0.97, 1.05]

Total events 3287 18644

Heterogeneity: Not applicable

Test for overall effect: Z = 0.51 (P = 0.61)

Total (95% CI) 214853 1218190 100.0% 1.02 [1.00, 1.04]

Total events 11719 74635

Heterogeneity: Chi<sup>2</sup> = 16.36, df = 12 (P = 0.18); I<sup>2</sup> = 27%

Test for overall effect: Z = 1.78 (P = 0.08)

Test for subgroup differences: Chi<sup>2</sup> = 6.87, df = 5 (P = 0.23), I<sup>2</sup> = 27.2%

Risk of bias legend

- (A) Random sequence generation (selection bias)
- (B) Allocation concealment (selection bias)
- (C) Blinding of participants and personnel (performance bias)
- (D) Blinding of outcome assessment (detection bias)
- (E) Incomplete outcome data (attrition bias)
- (F) Selective reporting (reporting bias)
- (G) Other bias
- (H) Observational Study: Incomplete follow-up
- (I) Observational Study: Failure to develop and apply appropriate eligibility criteria
- (J) Observational Study: Flawed measurement of exposure or outcome
- (K) Observational Study: Failure to adequately control for confounding

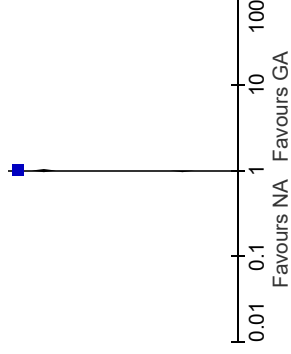

1.34 Myocardial infarction

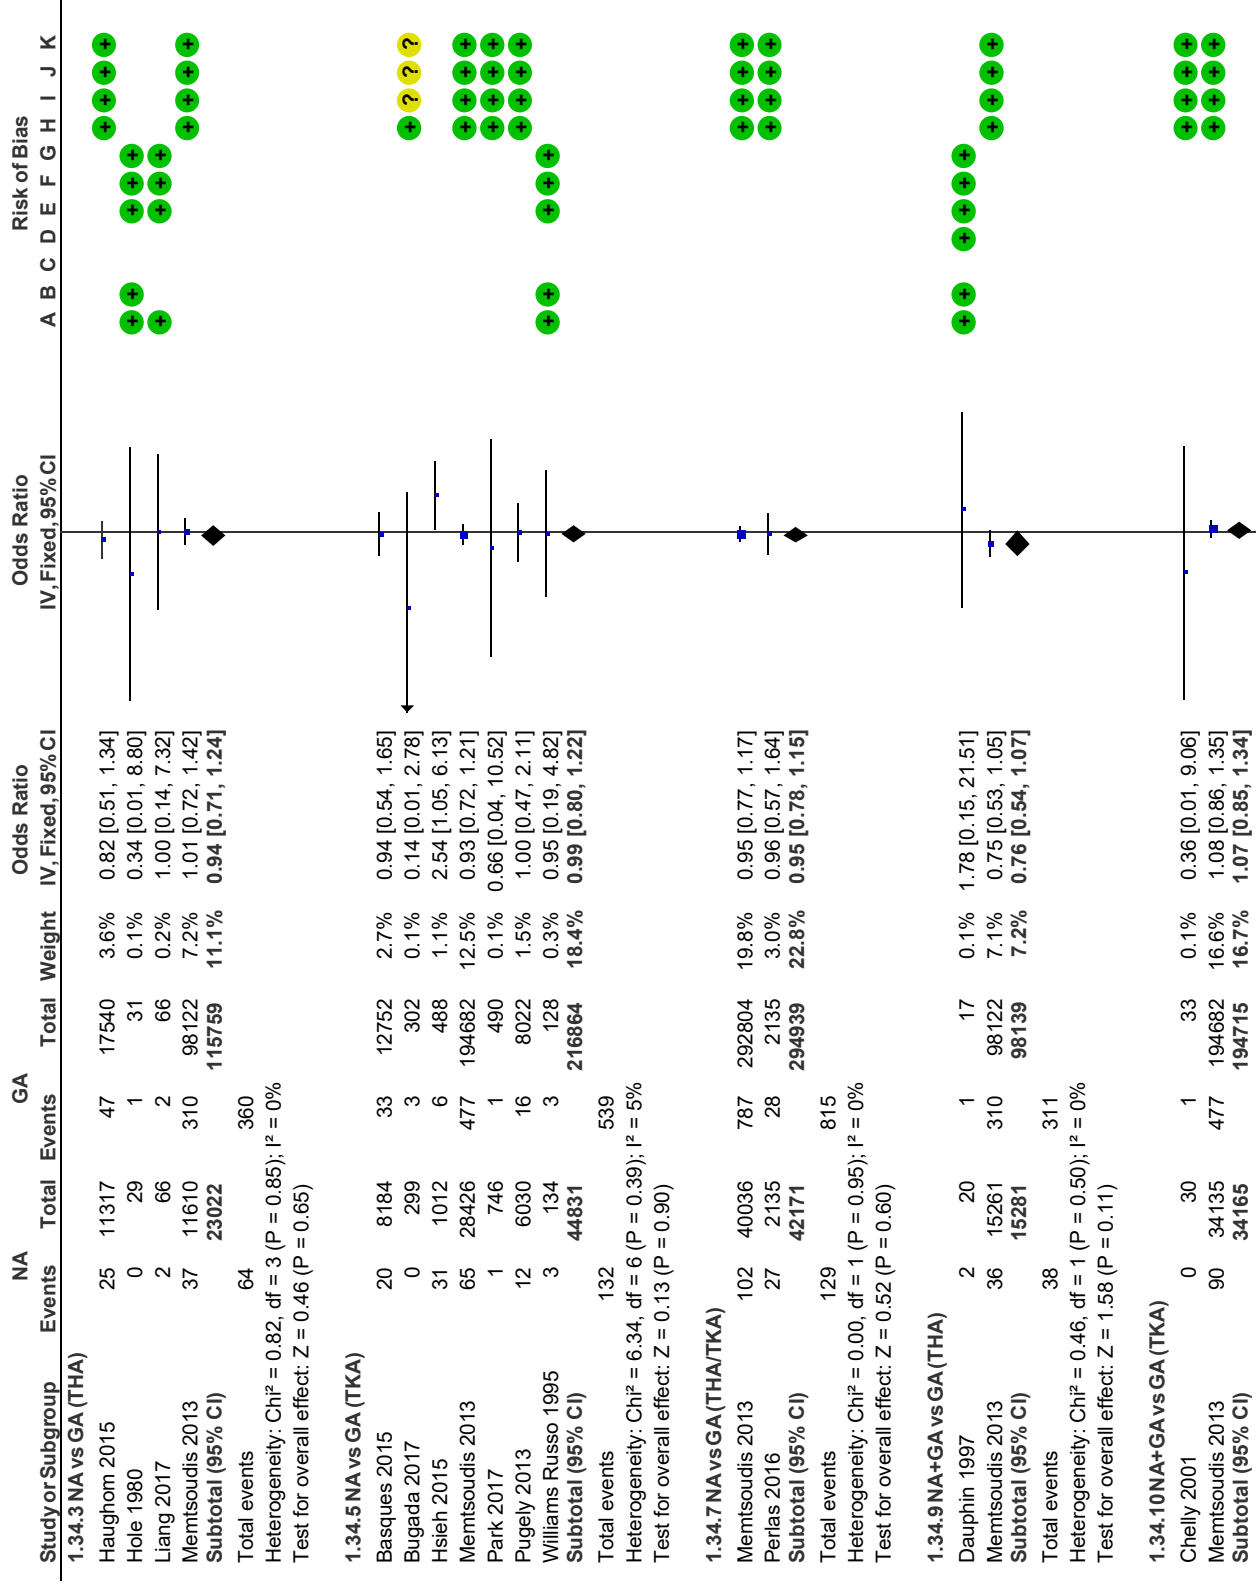

Total events 90 478  
 Heterogeneity:  $\text{Chi}^2 = 0.45$ ,  $\text{df} = 1$  ( $P = 0.50$ );  $I^2 = 0\%$   
 Test for overall effect:  $Z = 0.59$  ( $P = 0.55$ )

**1.34.11NA+GAsvsGA(THA/TKA)**

|                          |              |               |               |              |             |                     |
|--------------------------|--------------|---------------|---------------|--------------|-------------|---------------------|
| Memtsoudis 2013          | 126          | 49396         | 787           | 292804       | 23.8%       | 0.95 [0.79, 1.15]   |
| <b>Subtotal (95% CI)</b> | <b>49396</b> | <b>292804</b> | <b>292804</b> | <b>23.8%</b> | <b>0.95</b> | <b>[0.79, 1.15]</b> |

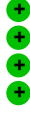

Total events 126 787  
 Heterogeneity: Not applicable  
 Test for overall effect:  $Z = 0.55$  ( $P = 0.59$ )

**Total (95% CI)** 208866 1213220 100.0% 0.96 [0.87, 1.05]

Total events 579 3290

Heterogeneity:  $\text{Chi}^2 = 10.90$ ,  $\text{df} = 17$  ( $P = 0.86$ );  $I^2 = 0\%$

Test for overall effect:  $Z = 0.91$  ( $P = 0.36$ )

Test for subgroup differences:  $\text{Chi}^2 = 2.84$ ,  $\text{df} = 5$  ( $P = 0.73$ ),  $I^2 = 0\%$

Risk of bias legend

- (A) Random sequence generation (selection bias)
- (B) Allocation concealment (selection bias)
- (C) Blinding of participants and personnel (performance bias)
- (D) Blinding of outcome assessment (detection bias)
- (E) Incomplete outcome data (attrition bias)
- (F) Selective reporting (reporting bias)
- (G) Other bias
- (H) Observational Study: Incomplete follow-up
- (I) Observational Study: Failure to develop and apply appropriate eligibility criteria
- (J) Observational Study: Flawed measurement of exposure or outcome
- (K) Observational Study: Failure to adequately control for confounding

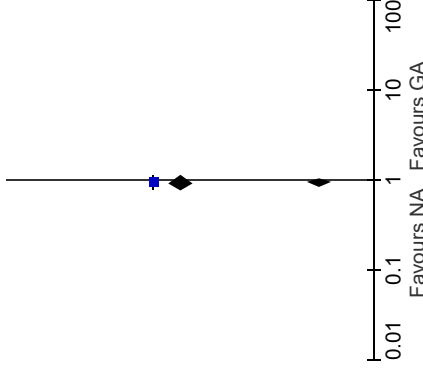



1.35 Pulmonary (excl. Pneumonia)

| Study or Subgroup                                                                   | Events       | NA    | Total         | GA     | Events       | Total                    | Weight | Odds Ratio        |                   | Risk of Bias |
|-------------------------------------------------------------------------------------|--------------|-------|---------------|--------|--------------|--------------------------|--------|-------------------|-------------------|--------------|
|                                                                                     |              |       |               |        |              |                          |        | IV, Fixed, 95% CI | IV, Fixed, 95% CI |              |
| <b>1.35.1 NA vs GA (THA)</b>                                                        |              |       |               |        |              |                          |        |                   |                   |              |
| ! Helwani 2015                                                                      | 23           | 5102  | 47            | 5396   | 1.2%         | 0.52 [0.31, 0.85]        |        |                   |                   | +            |
| Haughom 2015                                                                        | 17           | 11317 | 51            | 17540  | 1.0%         | 0.52 [0.30, 0.89]        |        |                   |                   | +            |
| Memtsoudis 2013                                                                     | 61           | 11610 | 710           | 98122  | 4.2%         | 0.72 [0.56, 0.94]        |        |                   |                   | +            |
| <b>Subtotal (95% CI)</b>                                                            | <b>28029</b> |       | <b>121058</b> |        | <b>6.3%</b>  | <b>0.65 [0.52, 0.80]</b> |        |                   |                   | +            |
| Total events                                                                        | 101          |       | 808           |        |              |                          |        |                   |                   | +            |
| Heterogeneity: Chi <sup>2</sup> = 2.16, df = 2 (P = 0.34); I <sup>2</sup> = 8%      |              |       |               |        |              |                          |        |                   |                   |              |
| Test for overall effect: Z = 3.99 (P < 0.0001)                                      |              |       |               |        |              |                          |        |                   |                   |              |
| <b>1.35.2 NA vs GA (TKA)</b>                                                        |              |       |               |        |              |                          |        |                   |                   |              |
| Basques 2015                                                                        | 11           | 8184  | 36            | 12752  | 0.6%         | 0.48 [0.24, 0.93]        |        |                   |                   | +            |
| Chu 2006                                                                            | 1            | 30    | 2             | 30     | 0.0%         | 0.48 [0.04, 5.63]        |        |                   |                   | +            |
| Memtsoudis 2013                                                                     | 131          | 28426 | 1312          | 194682 | 8.9%         | 0.68 [0.57, 0.82]        |        |                   |                   | +            |
| Park 2017                                                                           | 1            | 746   | 2             | 490    | 0.0%         | 0.33 [0.03, 3.62]        |        |                   |                   | +            |
| Pugely 2013                                                                         | 15           | 6030  | 16            | 8022   | 0.6%         | 1.25 [0.62, 2.53]        |        |                   |                   | +            |
| <b>Subtotal (95% CI)</b>                                                            | <b>43416</b> |       | <b>215976</b> |        | <b>10.2%</b> | <b>0.69 [0.58, 0.81]</b> |        |                   |                   | +            |
| Total events                                                                        | 159          |       | 1368          |        |              |                          |        |                   |                   | +            |
| Heterogeneity: Chi <sup>2</sup> = 4.34, df = 4 (P = 0.36); I <sup>2</sup> = 8%      |              |       |               |        |              |                          |        |                   |                   |              |
| Test for overall effect: Z = 4.38 (P < 0.0001)                                      |              |       |               |        |              |                          |        |                   |                   |              |
| <b>1.35.3 NA vs GA (THA/TKA)</b>                                                    |              |       |               |        |              |                          |        |                   |                   |              |
| ! Weingarten 2015                                                                   | 766          | 5503  | 2070          | 6467   | 33.7%        | 0.34 [0.31, 0.38]        |        |                   |                   | +            |
| Memtsoudis 2013                                                                     | 192          | 40036 | 2022          | 292804 | 13.1%        | 0.69 [0.60, 0.80]        |        |                   |                   | +            |
| <b>Subtotal (95% CI)</b>                                                            | <b>45539</b> |       | <b>299271</b> |        | <b>46.9%</b> | <b>0.42 [0.39, 0.45]</b> |        |                   |                   | +            |
| Total events                                                                        | 958          |       | 4092          |        |              |                          |        |                   |                   | +            |
| Heterogeneity: Chi <sup>2</sup> = 61.90, df = 1 (P < 0.00001); I <sup>2</sup> = 98% |              |       |               |        |              |                          |        |                   |                   |              |
| Test for overall effect: Z = 21.78 (P < 0.00001)                                    |              |       |               |        |              |                          |        |                   |                   |              |
| <b>1.35.4 NA+GA vs GA (THA)</b>                                                     |              |       |               |        |              |                          |        |                   |                   |              |
| Memtsoudis 2013                                                                     | 73           | 15261 | 710           | 98122  | 4.9%         | 0.66 [0.52, 0.84]        |        |                   |                   | +            |
| <b>Subtotal (95% CI)</b>                                                            | <b>15261</b> |       | <b>98122</b>  |        | <b>4.9%</b>  | <b>0.66 [0.52, 0.84]</b> |        |                   |                   | +            |
| Total events                                                                        | 73           |       | 710           |        |              |                          |        |                   |                   | +            |
| Heterogeneity: Not applicable                                                       |              |       |               |        |              |                          |        |                   |                   |              |
| Test for overall effect: Z = 3.38 (P = 0.0007)                                      |              |       |               |        |              |                          |        |                   |                   |              |
| <b>1.35.5 NA+GA vs GA (TKA)</b>                                                     |              |       |               |        |              |                          |        |                   |                   |              |
| Chelly 2001                                                                         | 1            | 30    | 2             | 33     | 0.0%         | 0.53 [0.05, 6.21]        |        |                   |                   | +            |
| Memtsoudis 2013                                                                     | 206          | 34135 | 1312          | 194682 | 13.3%        | 0.89 [0.77, 1.04]        |        |                   |                   | +            |
| <b>Subtotal (95% CI)</b>                                                            | <b>34165</b> |       | <b>194715</b> |        | <b>13.3%</b> | <b>0.89 [0.77, 1.03]</b> |        |                   |                   | +            |
| Total events                                                                        | 207          |       | 1314          |        |              |                          |        |                   |                   | +            |
| Heterogeneity: Chi <sup>2</sup> = 0.17, df = 1 (P = 0.68); I <sup>2</sup> = 0%      |              |       |               |        |              |                          |        |                   |                   |              |
| Test for overall effect: Z = 1.51 (P = 0.13)                                        |              |       |               |        |              |                          |        |                   |                   |              |

**1.35.6NA+GA vs GA (THA/TKA)**

|                          |              |               |              |                          |       |                   |
|--------------------------|--------------|---------------|--------------|--------------------------|-------|-------------------|
| Memtsoudis 2013          | 279          | 49396         | 2022         | 292804                   | 18.3% | 0.82 [0.72, 0.93] |
| <b>Subtotal (95% CI)</b> | <b>49396</b> | <b>292804</b> | <b>18.3%</b> | <b>0.82 [0.72, 0.93]</b> |       |                   |

Total events 279 2022

Heterogeneity: Not applicable

Test for overall effect: Z = 3.16 (P = 0.002)

**Total (95% CI)** 215806 1221946 100.0% 0.58 [0.55, 0.61]

Total events 1777 10314

Heterogeneity: Chi<sup>2</sup> = 203.09, df = 13 (P < 0.00001); I<sup>2</sup> = 94%

Test for overall effect: Z = 19.96 (P < 0.00001)

Test for subgroup differences: Chi<sup>2</sup> = 134.52, df = 5 (P < 0.00001), I<sup>2</sup> = 96.3%

Risk of bias legend

- (A) Random sequence generation (selection bias)
- (B) Allocation concealment (selection bias)
- (C) Blinding of participants and personnel (performance bias)
- (D) Blinding of outcome assessment (detection bias)
- (E) Incomplete outcome data (attrition bias)
- (F) Selective reporting (reporting bias)
- (G) Other bias
- (H) Observational Study: Incomplete follow-up
- (I) Observational Study: Failure to develop and apply appropriate eligibility criteria
- (J) Observational Study: Flawed measurement of exposure or outcome
- (K) Observational Study: Failure to adequately control for confounding

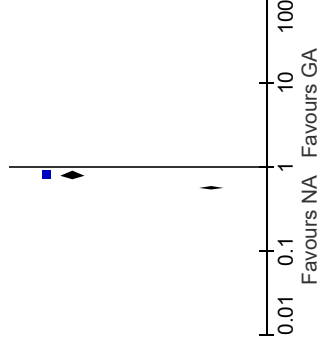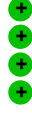

1.53 Pneumonia

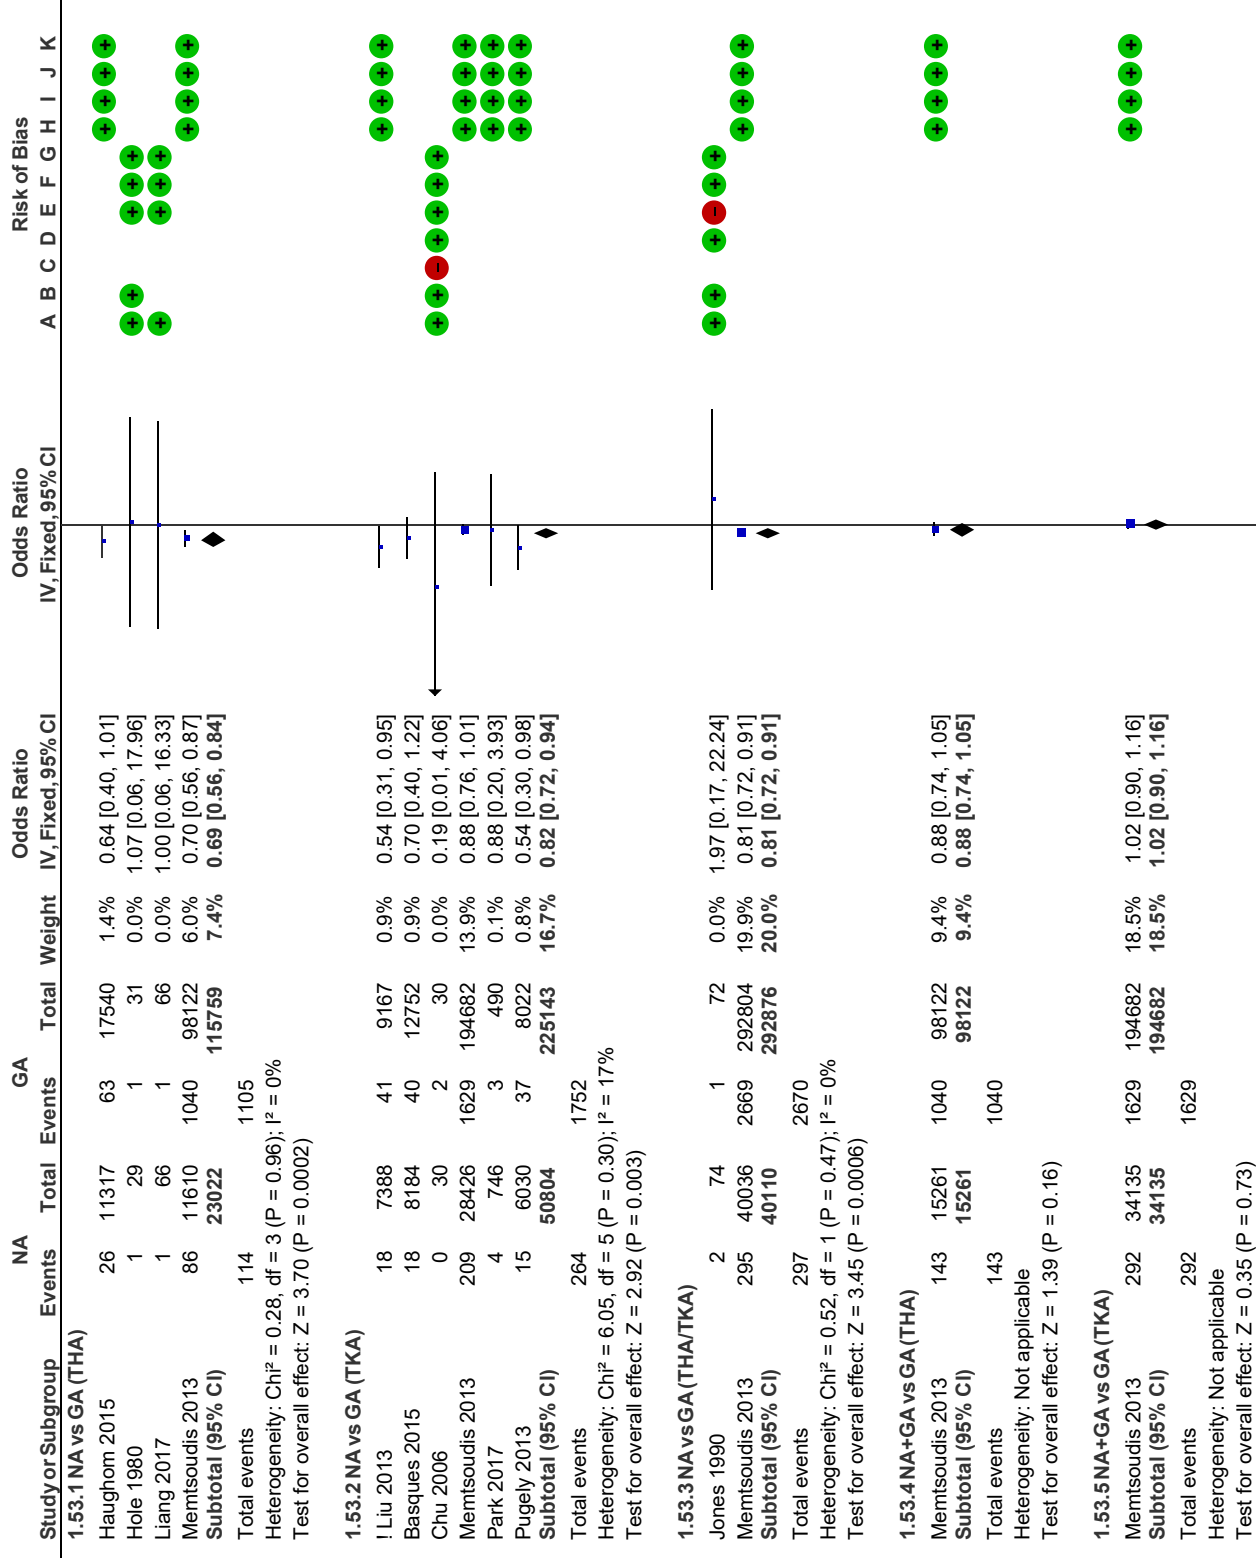

1.53.6NA+GA vs GA(THA/TKA)  
 Memtsoudis 2013 435 49396 2669 292804 28.0% 0.97 [0.87, 1.07]  
 Subtotal (95% CI) 49396 292804 28.0% 0.97 [0.87, 1.07]

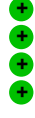

Total events 435 2669  
 Heterogeneity: Not applicable  
 Test for overall effect: Z = 0.67 (P = 0.50)

Total (95% CI) 212728 1219386 100.0% 0.89 [0.84, 0.94]

Total events 1545 10865

Heterogeneity: Chi<sup>2</sup> = 24.37, df = 14 (P = 0.04); I<sup>2</sup> = 43%

Test for overall effect: Z = 4.37 (P < 0.0001)

Test for subgroup differences: Chi<sup>2</sup> = 17.53, df = 5 (P = 0.004), I<sup>2</sup> = 71.5%

Risk of bias legend

- (A) Random sequence generation (selection bias)
- (B) Allocation concealment (selection bias)
- (C) Blinding of participants and personnel (performance bias)
- (D) Blinding of outcome assessment (detection bias)
- (E) Incomplete outcome data (attrition bias)
- (F) Selective reporting (reporting bias)
- (G) Other bias
- (H) Observational Study: Incomplete follow-up
- (I) Observational Study: Failure to develop and apply appropriate eligibility criteria
- (J) Observational Study: Flawed measurement of exposure or outcome
- (K) Observational Study: Failure to adequately control for confounding

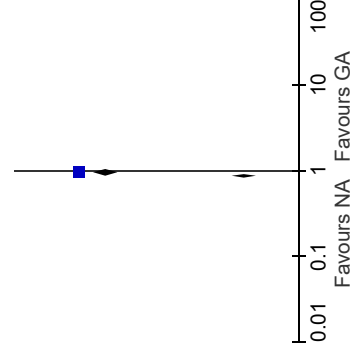

1.54 Gastrointestinal

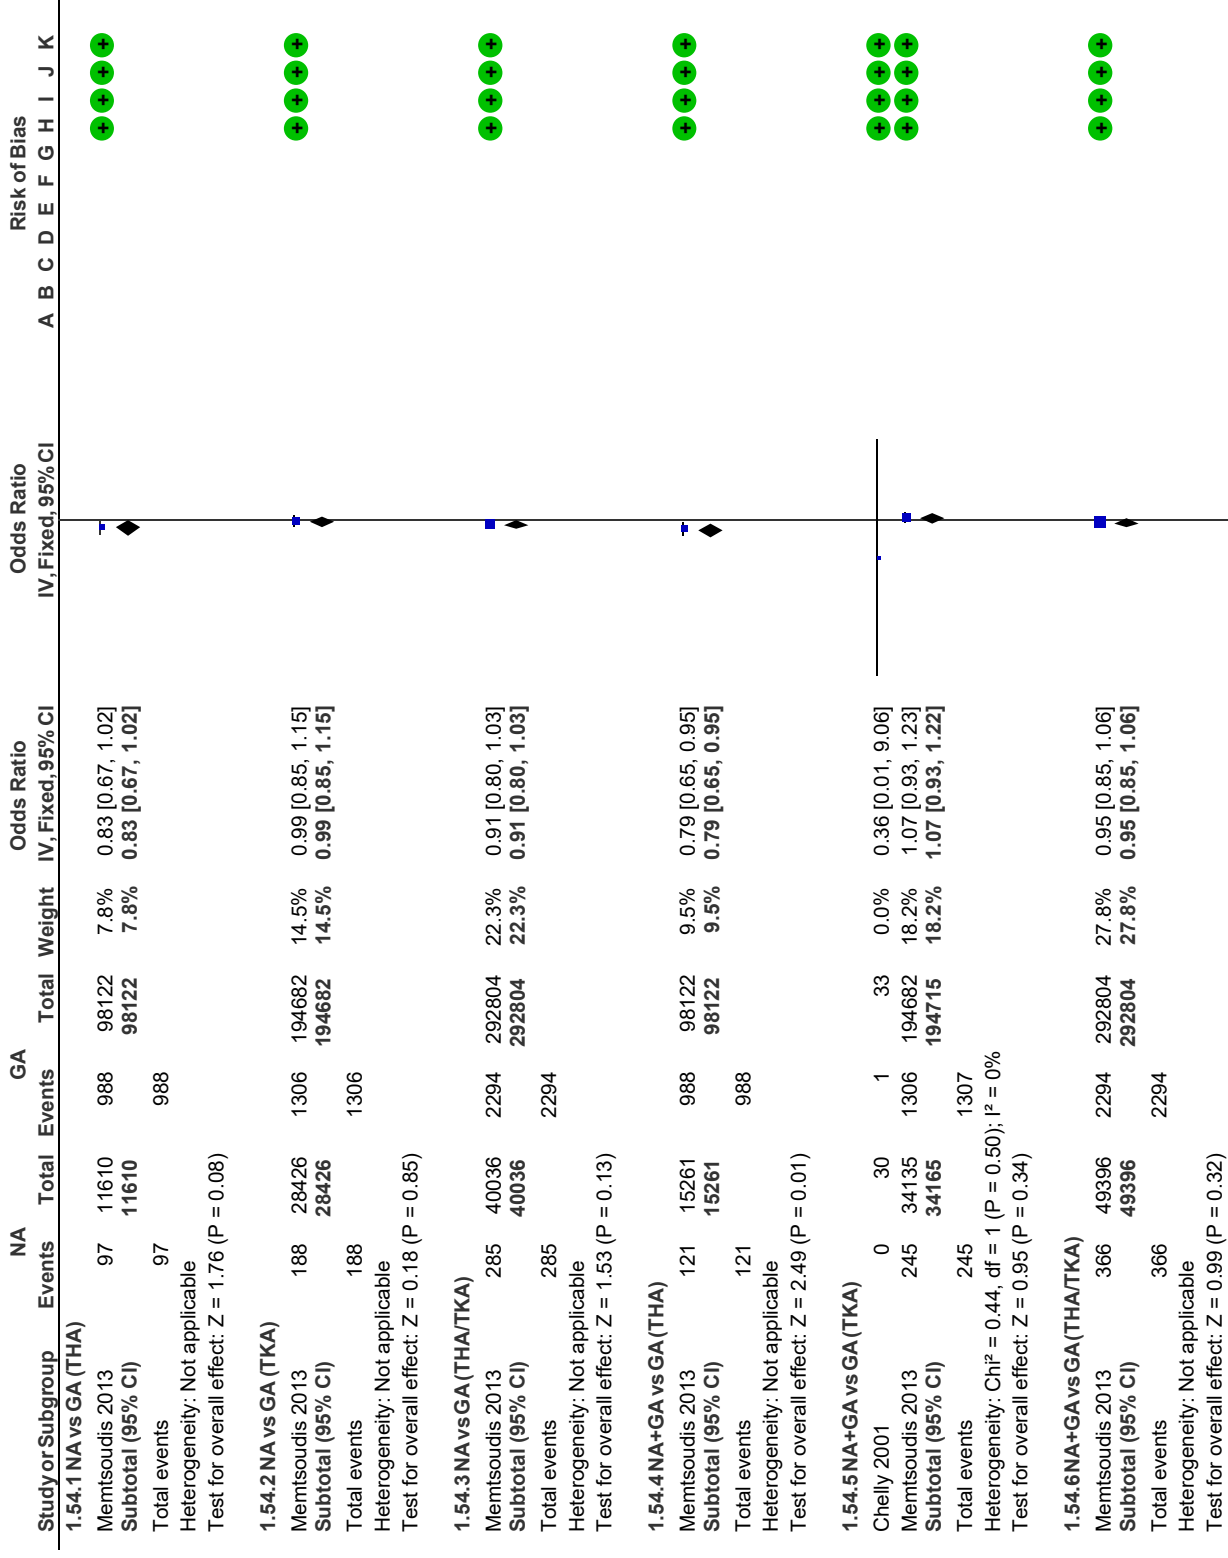

Total (95% CI) 178894 1171249 100.0% 0.94 [0.88, 0.99]

Total events 1302 9177

Heterogeneity:  $\text{Chi}^2 = 9.31$ ,  $\text{df} = 6$  ( $P = 0.16$ );  $I^2 = 36\%$

Test for overall effect:  $Z = 2.17$  ( $P = 0.03$ )

Test for subgroup differences:  $\text{Chi}^2 = 8.87$ ,  $\text{df} = 5$  ( $P = 0.11$ ),  $I^2 = 43.6\%$

Risk of bias legend

- (A) Random sequence generation (selection bias)
- (B) Allocation concealment (selection bias)
- (C) Blinding of participants and personnel (performance bias)
- (D) Blinding of outcome assessment (detection bias)
- (E) Incomplete outcome data (attrition bias)
- (F) Selective reporting (reporting bias)
- (G) Other bias
- (H) Observational Study: Incomplete follow-up
- (I) Observational Study: Failure to develop and apply appropriate eligibility criteria
- (J) Observational Study: Flawed measurement of exposure or outcome
- (K) Observational Study: Failure to adequately control for confounding

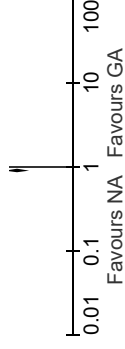

1.56 Acute renal failure

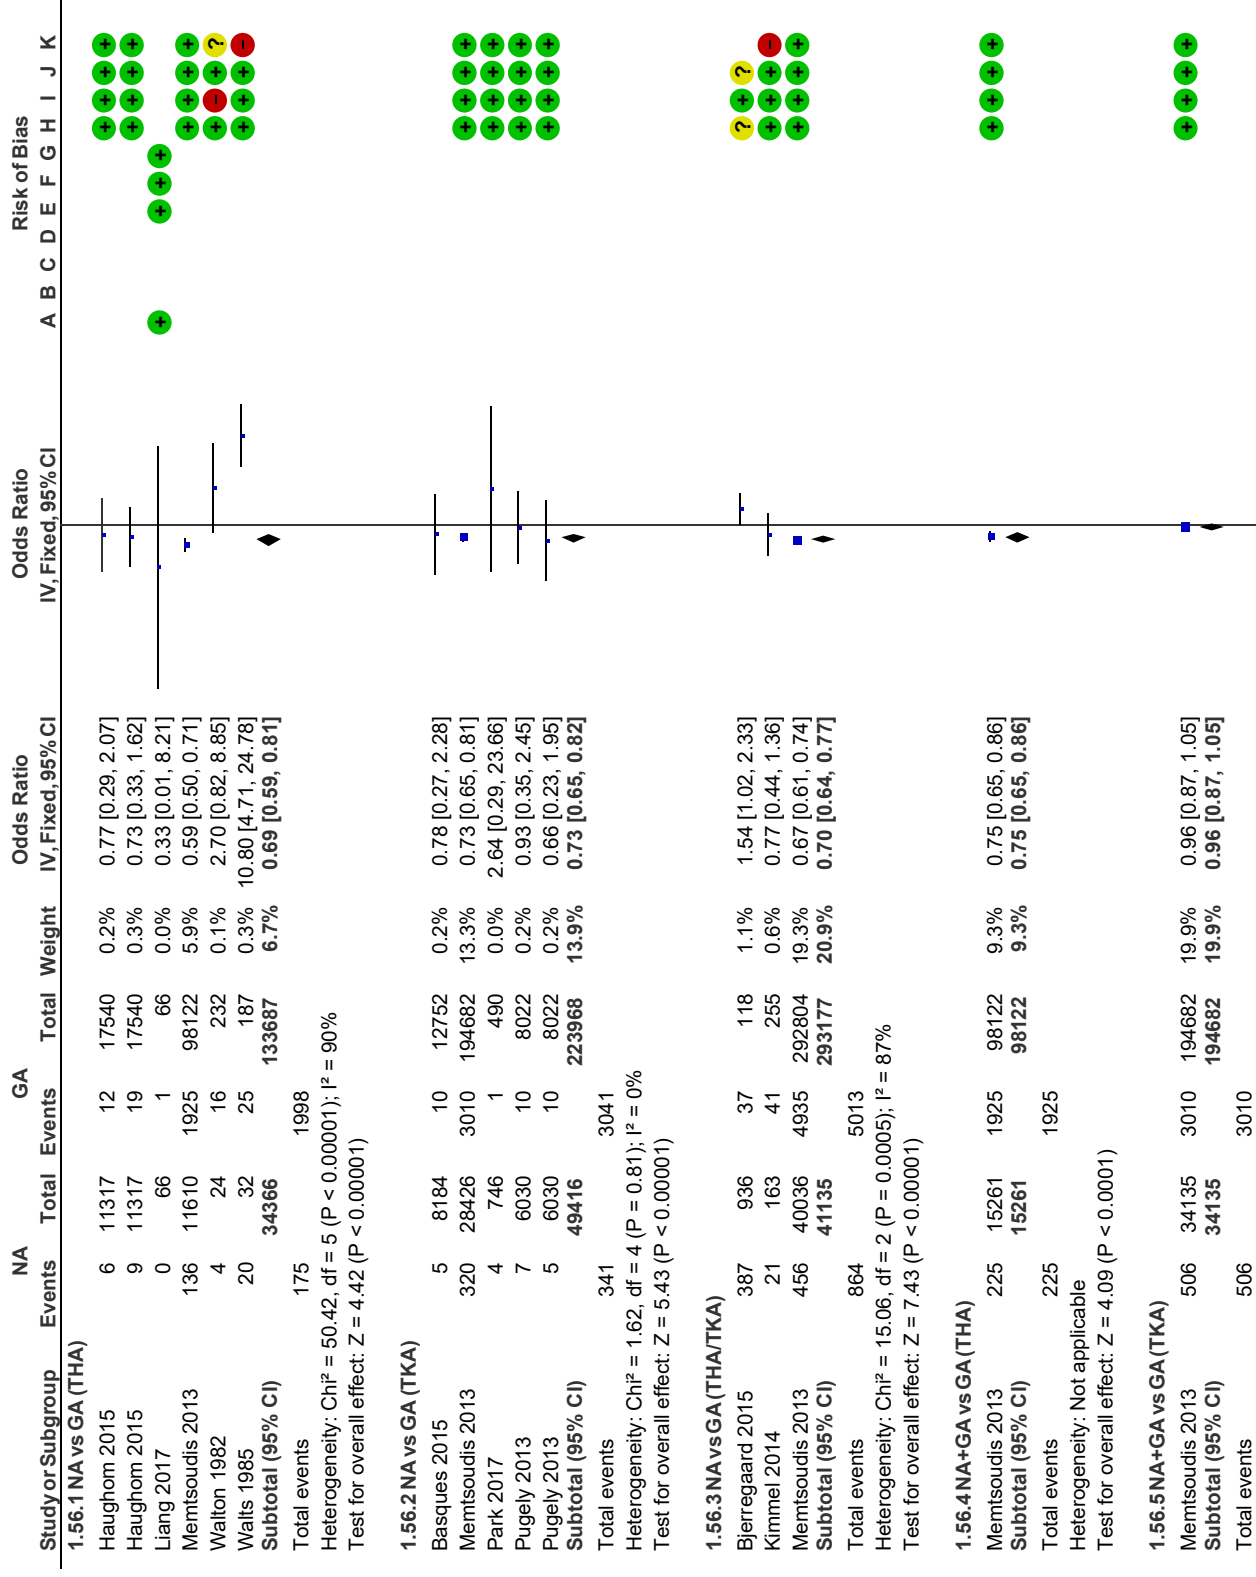

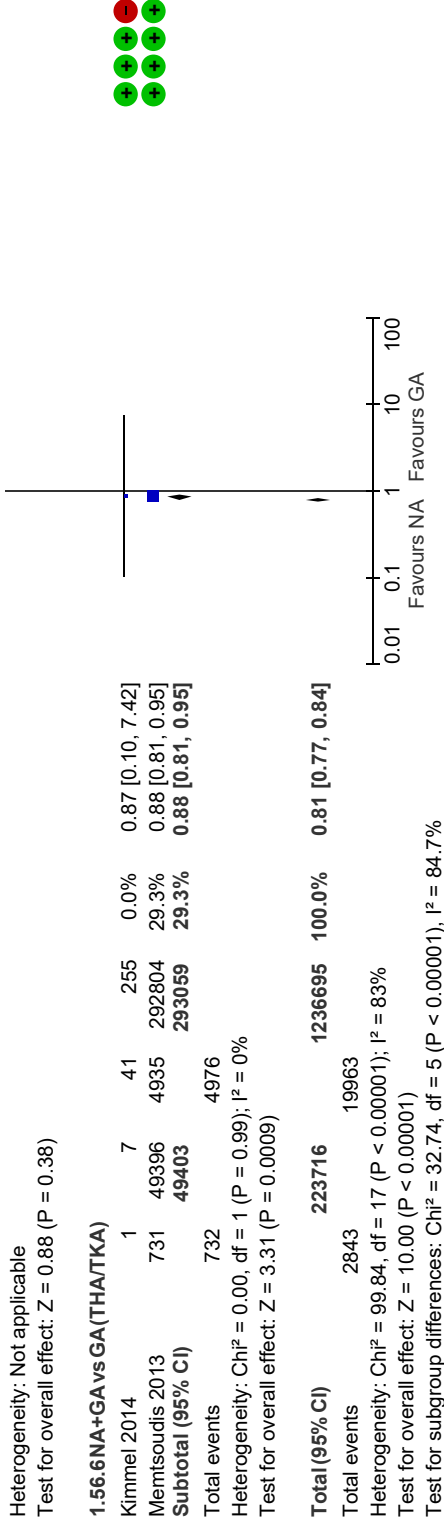

Risk of bias legend

- (A) Random sequence generation (selection bias)
- (B) Allocation concealment (selection bias)
- (C) Blinding of participants and personnel (performance bias)
- (D) Blinding of outcome assessment (detection bias)
- (E) Incomplete outcome data (attrition bias)
- (F) Selective reporting (reporting bias)
- (G) Other bias
- (H) Observational Study: Incomplete follow-up
- (I) Observational Study: Failure to develop and apply appropriate eligibility criteria
- (J) Observational Study: Flawed measurement of exposure or outcome
- (K) Observational Study: Failure to adequately control for confounding



1.59 Urinary retention

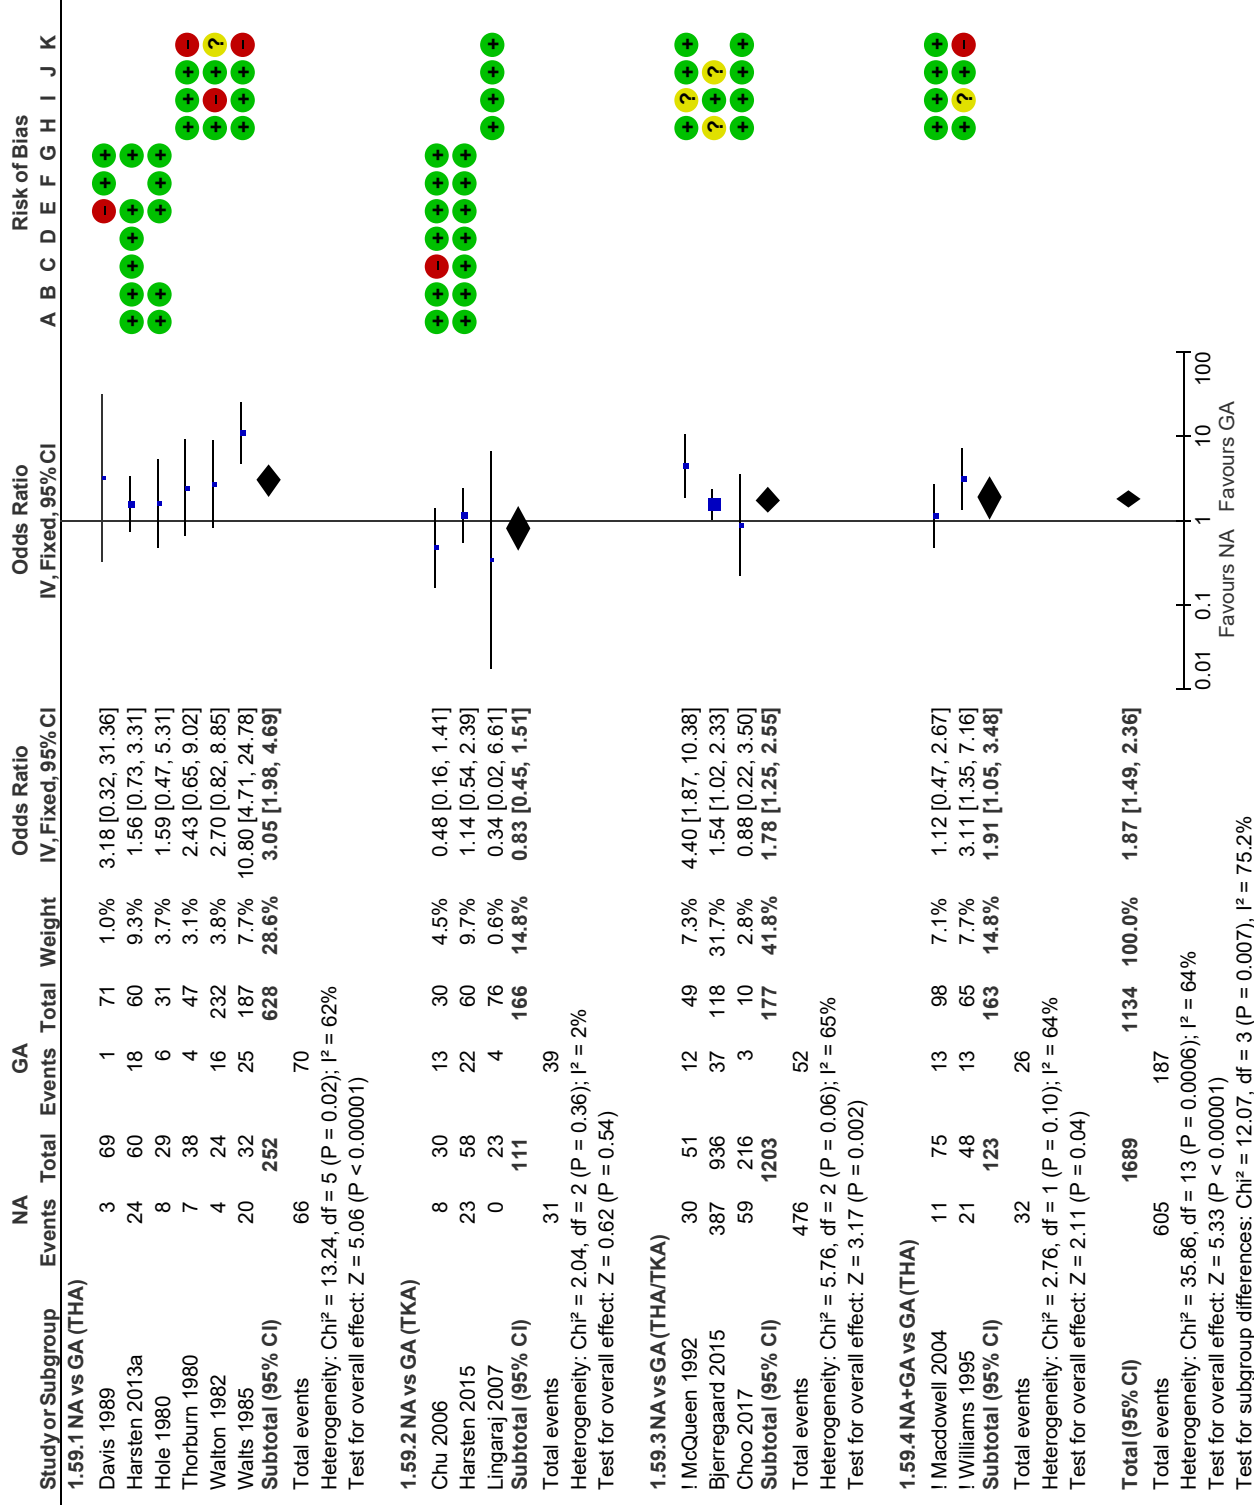

Risk of bias legend

- (A) Random sequence generation (selection bias)
- (B) Allocation concealment (selection bias)
- (C) Blinding of participants and personnel (performance bias)
- (D) Blinding of outcome assessment (detection bias)
- (E) Incomplete outcome data (attrition bias)
- (F) Selective reporting (reporting bias)
- (G) Other bias
- (H) Observational Study: Incomplete follow-up
- (I) Observational Study: Failure to develop and apply appropriate eligibility criteria
- (J) Observational Study: Flawed measurement of exposure or outcome
- (K) Observational Study: Failure to adequately control for confounding

1.67 Urinary tract infection

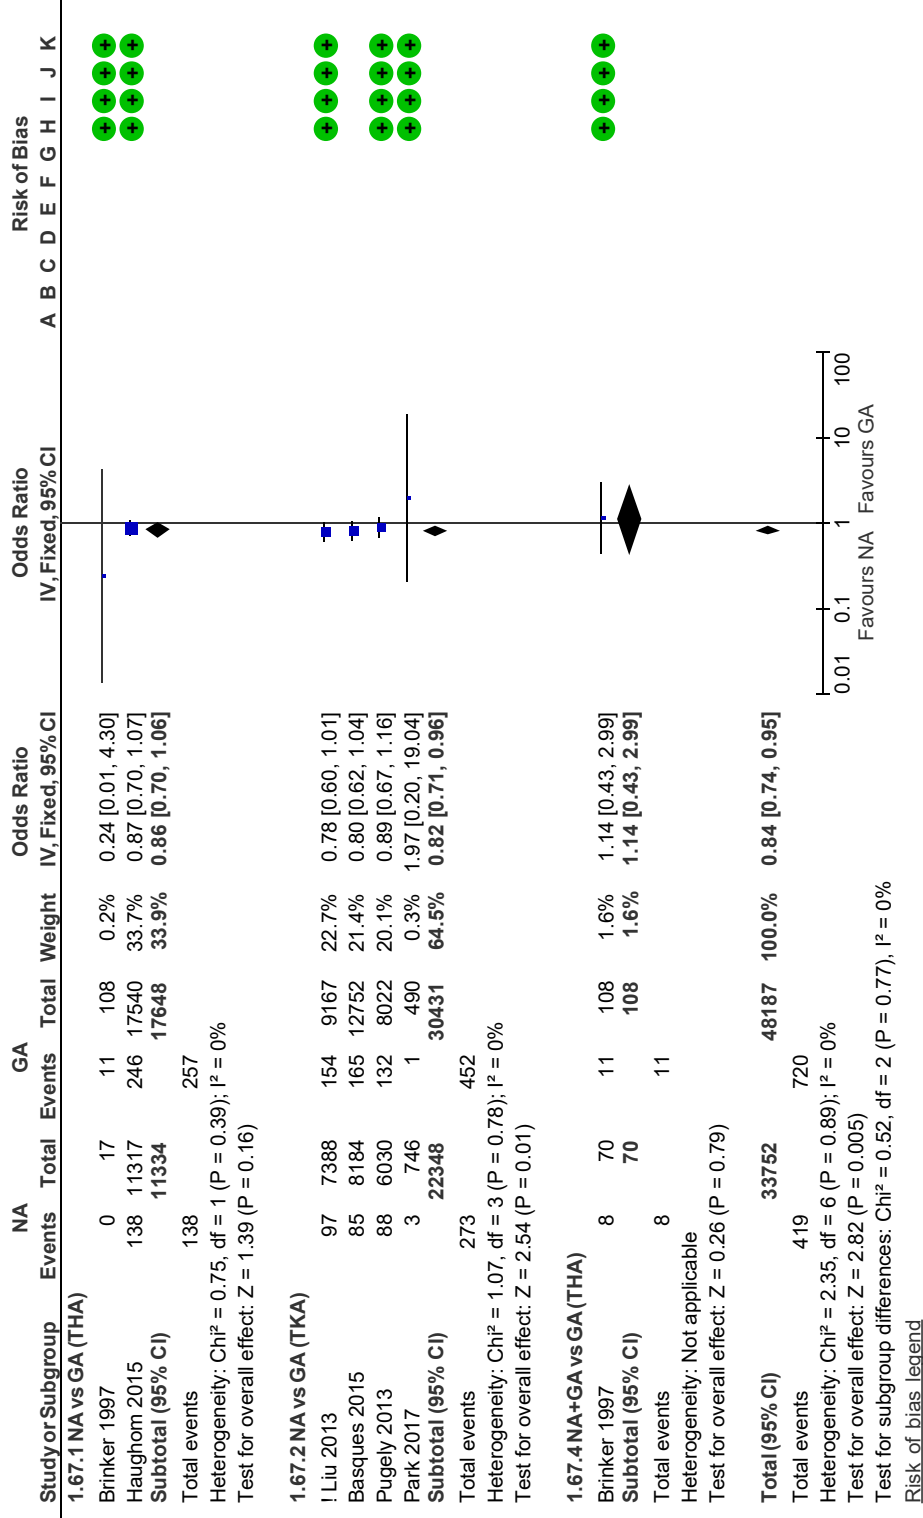

Risk of bias legend

- (A) Random sequence generation (selection bias)
- (B) Allocation concealment (selection bias)
- (C) Blinding of participants and personnel (performance bias)
- (D) Blinding of outcome assessment (detection bias)
- (E) Incomplete outcome data (attrition bias)
- (F) Selective reporting (reporting bias)
- (G) Other bias
- (H) Observational Study: Incomplete follow-up
- (I) Observational Study: Failure to develop and apply appropriate eligibility criteria
- (J) Observational Study: Flawed measurement of exposure or outcome
- (K) Observational Study: Failure to adequately control for confounding

1.68 Deep venous thrombosis (DVT)

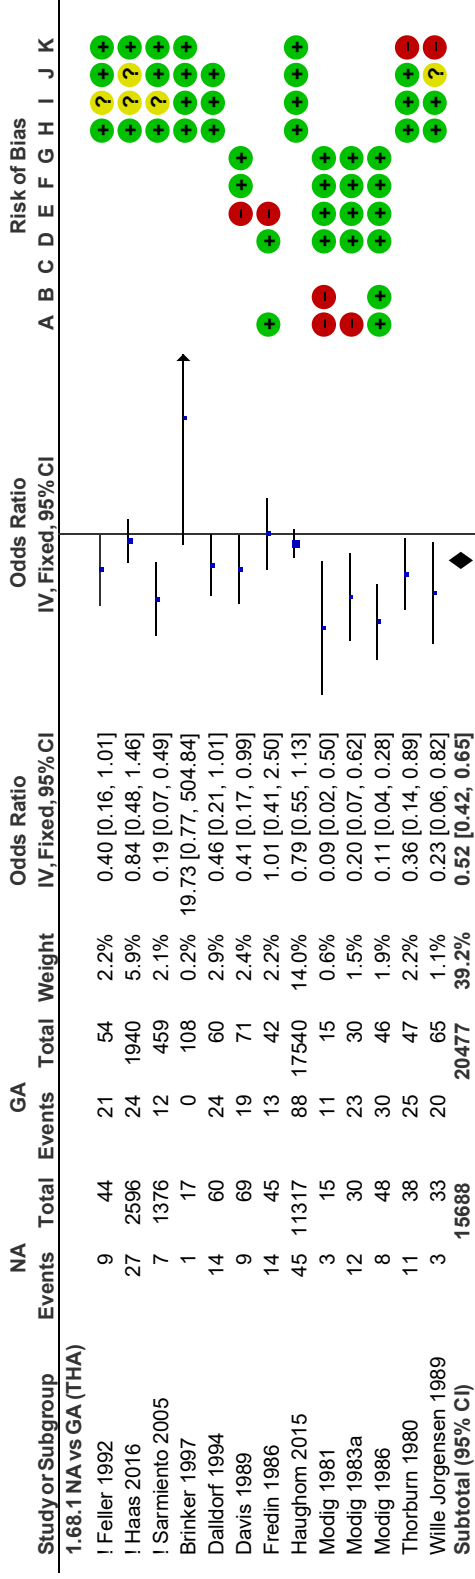

Total events 163  
 Heterogeneity: Chi<sup>2</sup> = 39.25, df = 12 (P < 0.0001); I<sup>2</sup> = 69%  
 Test for overall effect: Z = 5.94 (P < 0.00001)

1.68.2 NA vs GA (TKA)

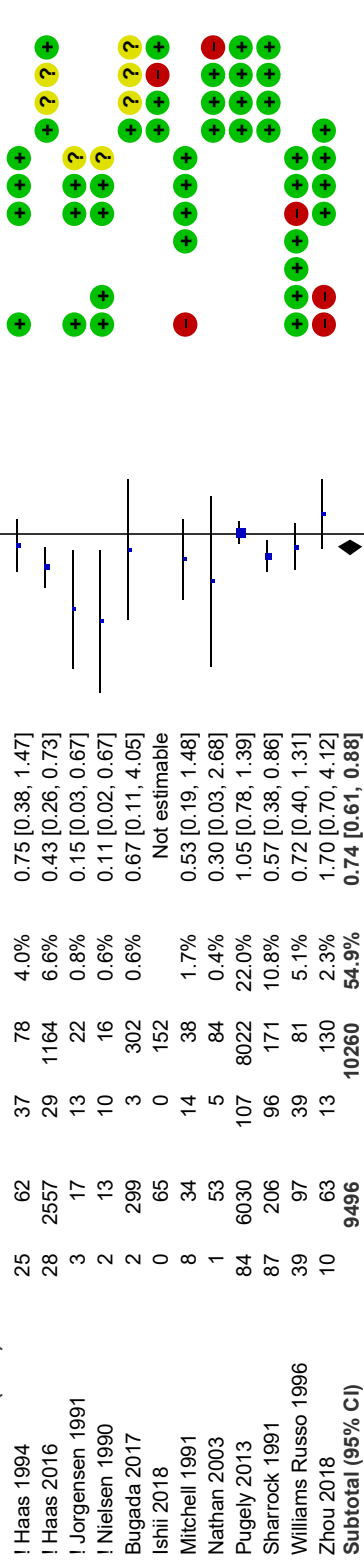

Total events 289  
 Heterogeneity: Chi<sup>2</sup> = 24.15, df = 10 (P = 0.007); I<sup>2</sup> = 59%  
 Test for overall effect: Z = 3.29 (P = 0.001)

1.68.3 NA vs GA (THA/TKA)

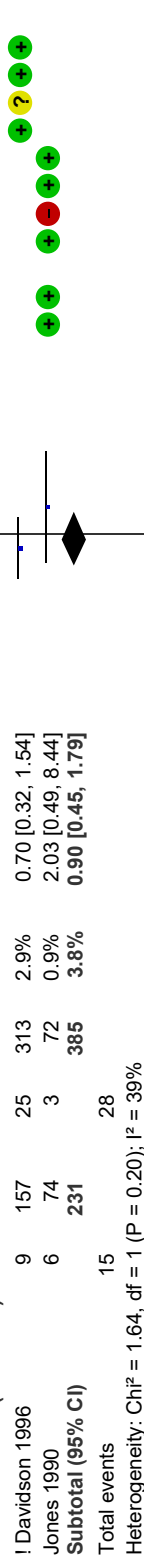

Total events 15  
 Heterogeneity: Chi<sup>2</sup> = 1.64, df = 1 (P = 0.20); I<sup>2</sup> = 39%

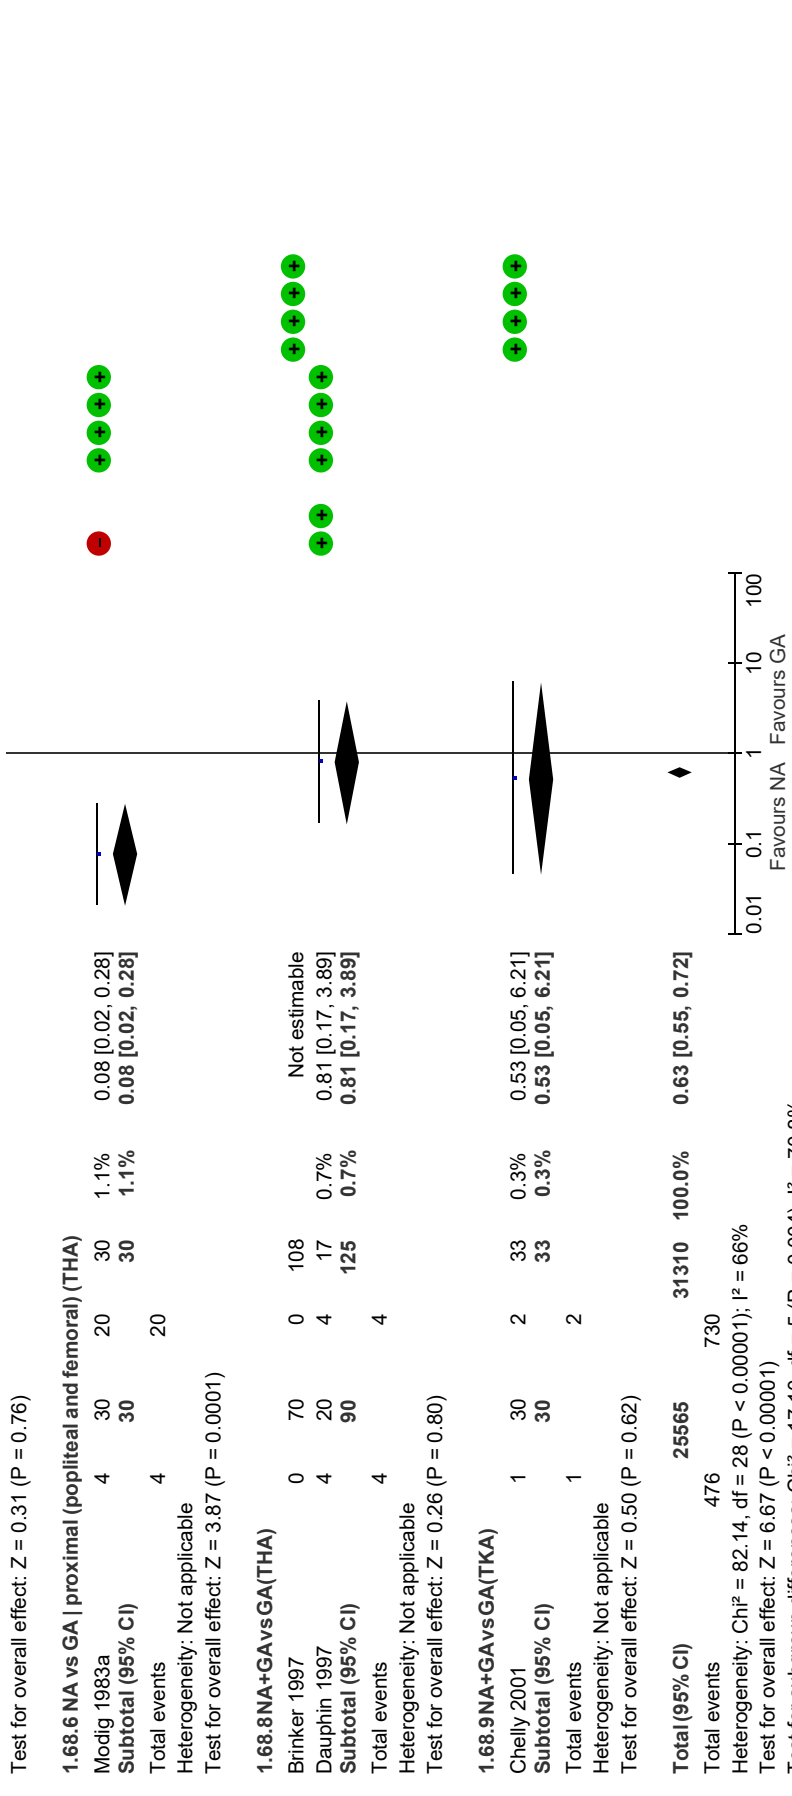

Test for overall effect:  $Z = 0.31$  ( $P = 0.76$ )

Heterogeneity:  $\text{Chi}^2 = 82.14$ ,  $\text{df} = 28$  ( $P < 0.00001$ );  $I^2 = 66\%$   
 Test for overall effect:  $Z = 6.67$  ( $P < 0.00001$ )  
 Test for subgroup differences:  $\text{Chi}^2 = 17.10$ ,  $\text{df} = 5$  ( $P = 0.004$ ),  $I^2 = 70.8\%$

**Risk of bias legend**

- (A) Random sequence generation (selection bias)
- (B) Allocation concealment (selection bias)
- (C) Blinding of participants and personnel (performance bias)
- (D) Blinding of outcome assessment (detection bias)
- (E) Incomplete outcome data (attrition bias)
- (F) Selective reporting (reporting bias)
- (G) Other bias
- (H) Observational Study: Incomplete follow-up
- (I) Observational Study: Failure to develop and apply appropriate eligibility criteria
- (J) Observational Study: Flawed measurement of exposure or outcome
- (K) Observational Study: Failure to adequately control for confounding

1.72 Pulmonary embolism (PE)

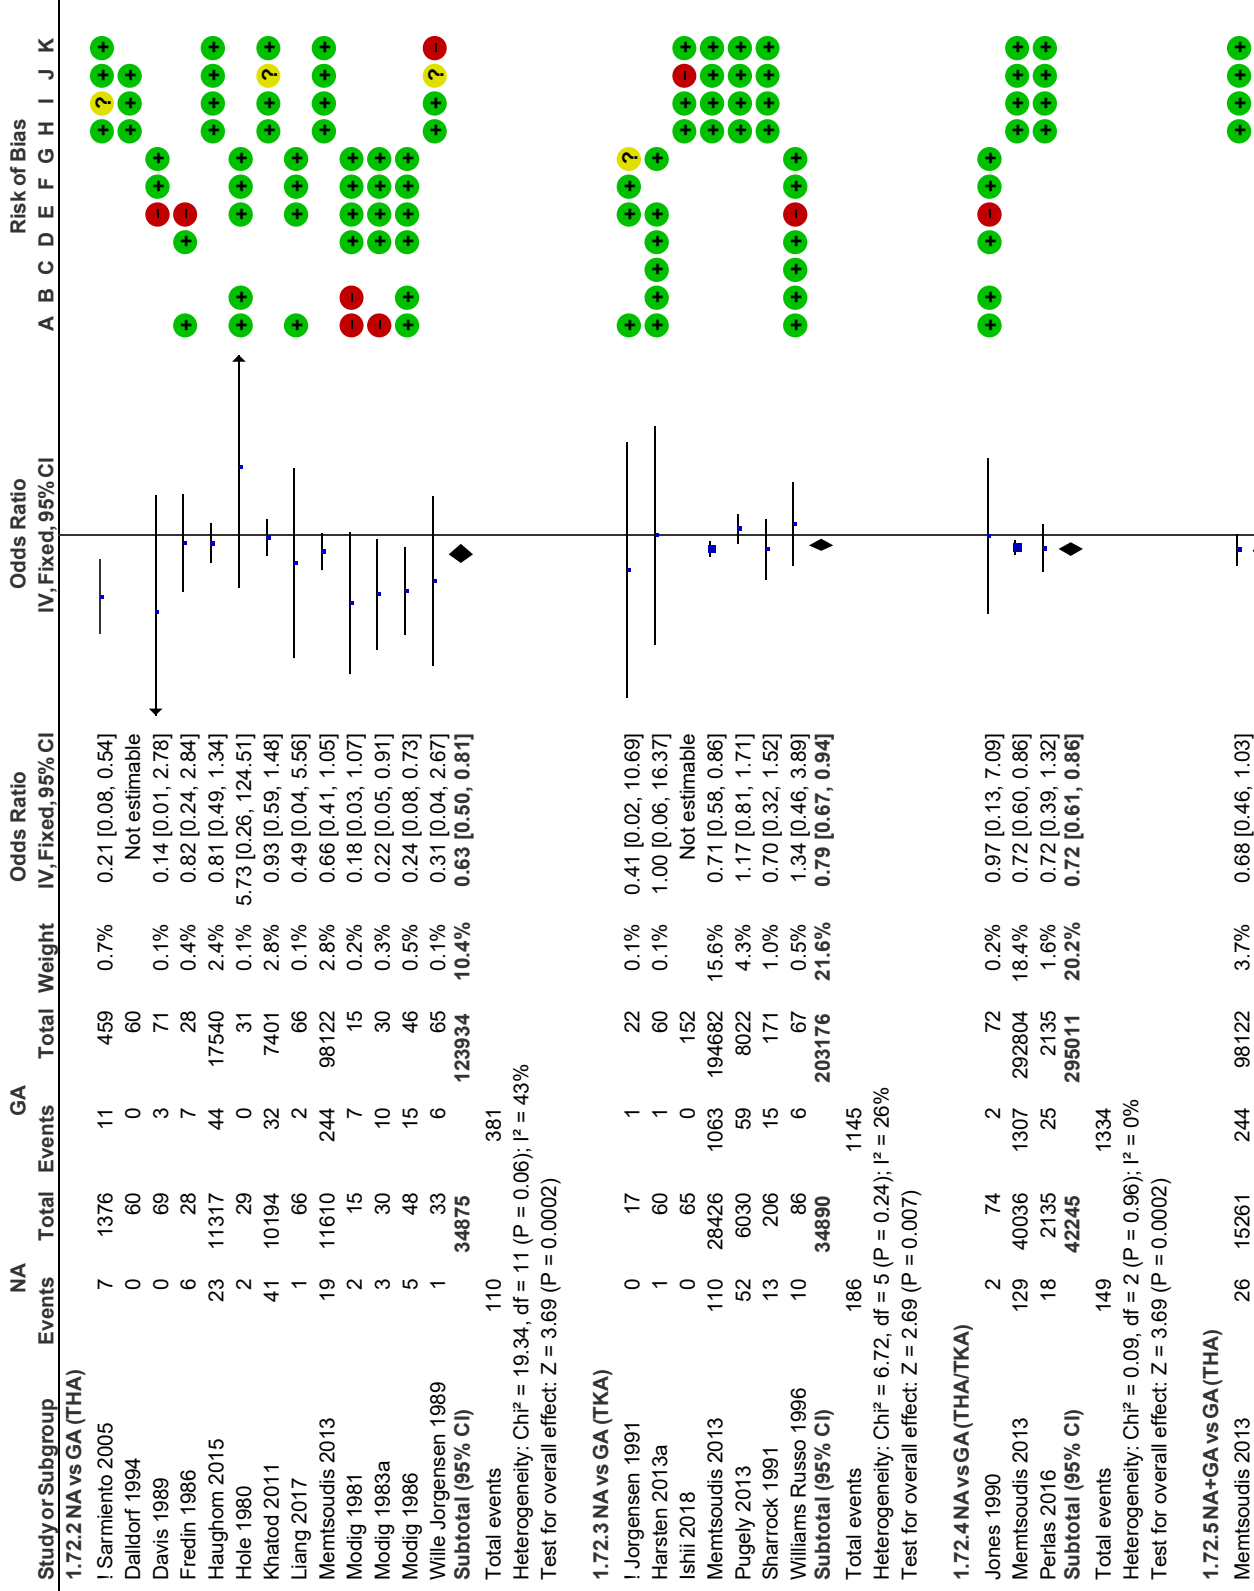

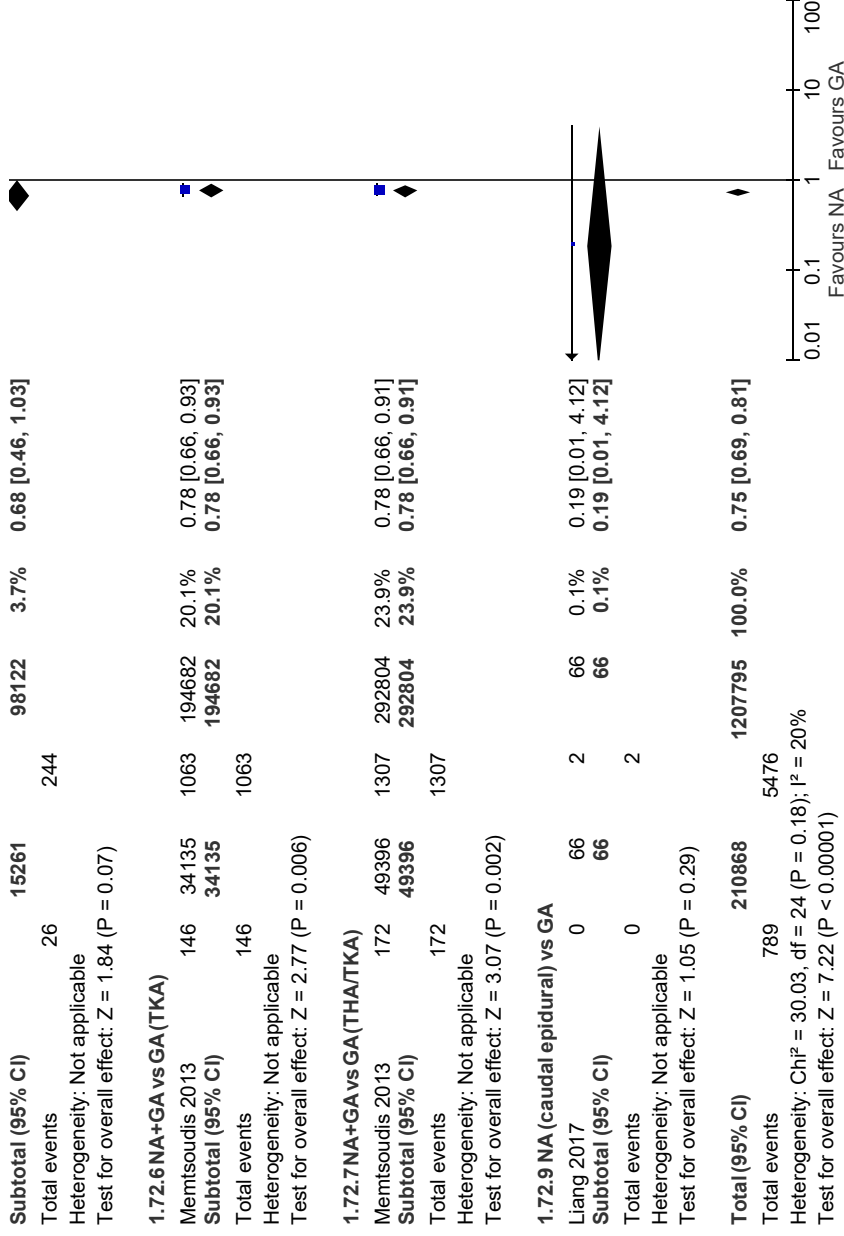

- Risk of bias legend**
- (A) Random sequence generation (selection bias)
  - (B) Allocation concealment (selection bias)
  - (C) Blinding of participants and personnel (performance bias)
  - (D) Blinding of outcome assessment (detection bias)
  - (E) Incomplete outcome data (attrition bias)
  - (F) Selective reporting (reporting bias)
  - (G) Other bias
  - (H) Observational Study: Incomplete follow-up
  - (I) Observational Study: Failure to develop and apply appropriate eligibility criteria
  - (J) Observational Study: Flawed measurement of exposure or outcome
  - (K) Observational Study: Failure to adequately control for confounding

1.74 Thrombembolism (DVT + PE)

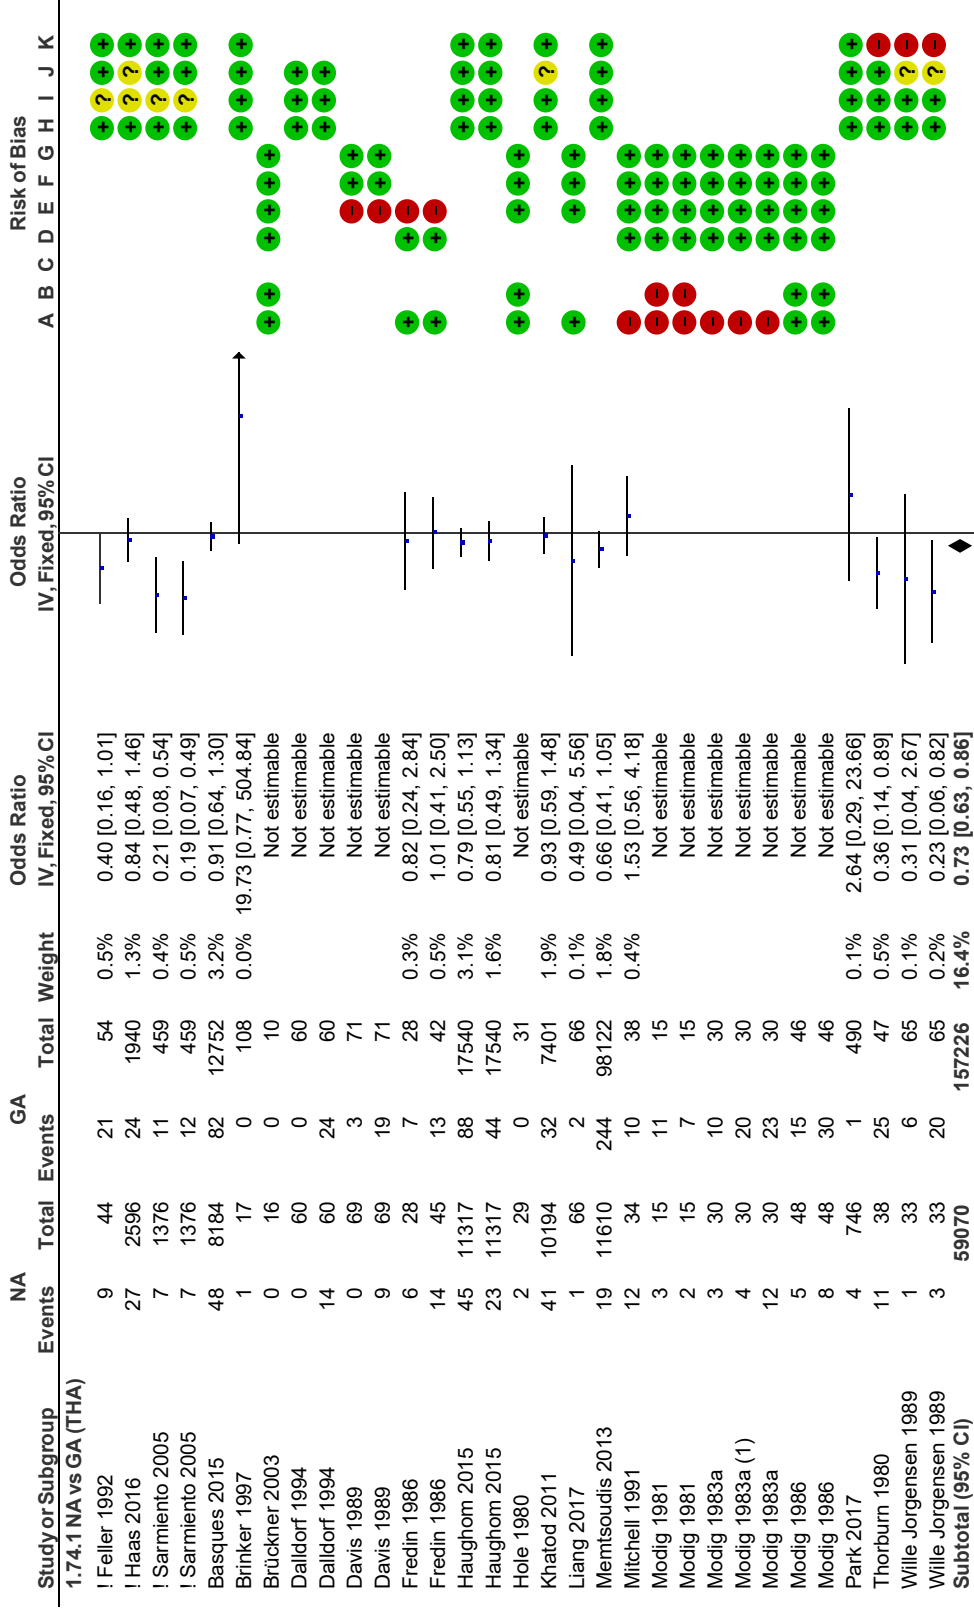

Heterogeneity: Chi<sup>2</sup> = 33.56, df = 17 (P = 0.010); I<sup>2</sup> = 49%  
 Test for overall effect: Z = 3.87 (P = 0.0001)

1.74.3 NA vs GA (TKA)

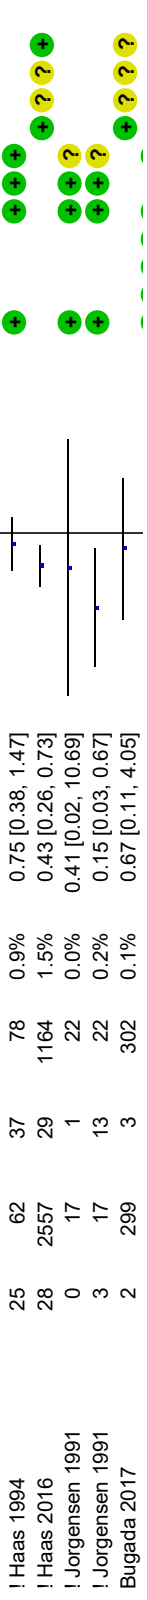



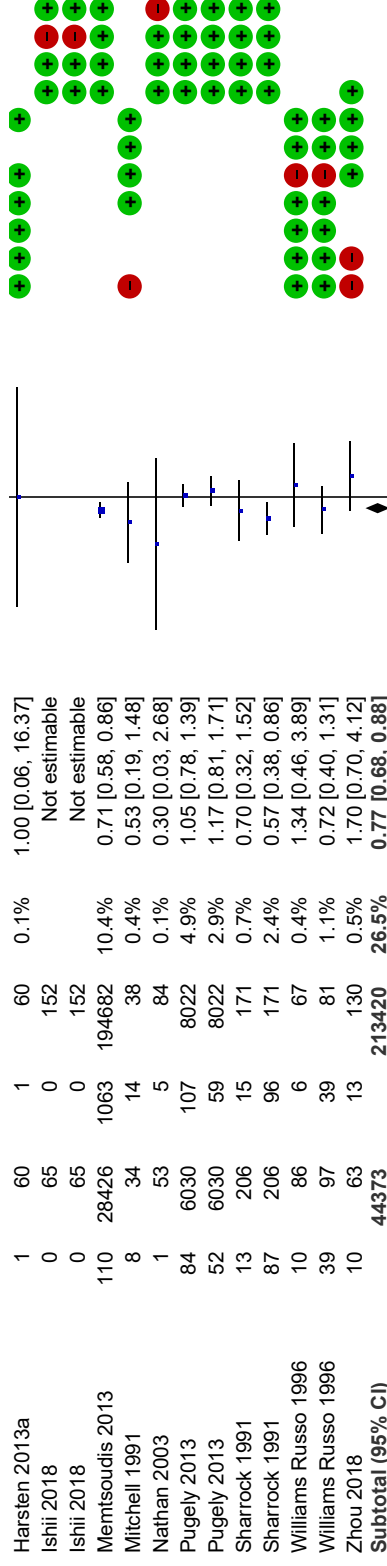

Total events 473 1501  
 Heterogeneity: Chi<sup>2</sup> = 26.77, df = 15 (P = 0.03); I<sup>2</sup> = 44%  
 Test for overall effect: Z = 4.05 (P < 0.0001)

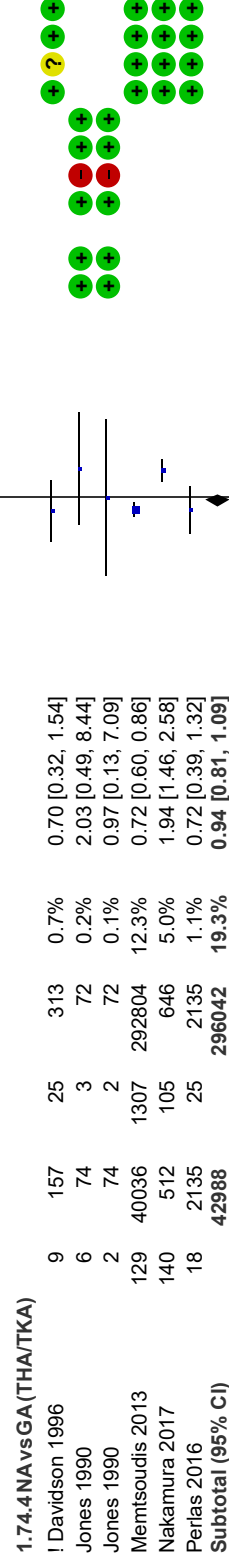

Total events 304 1467  
 Heterogeneity: Chi<sup>2</sup> = 35.38, df = 5 (P < 0.00001); I<sup>2</sup> = 86%  
 Test for overall effect: Z = 0.84 (P = 0.40)

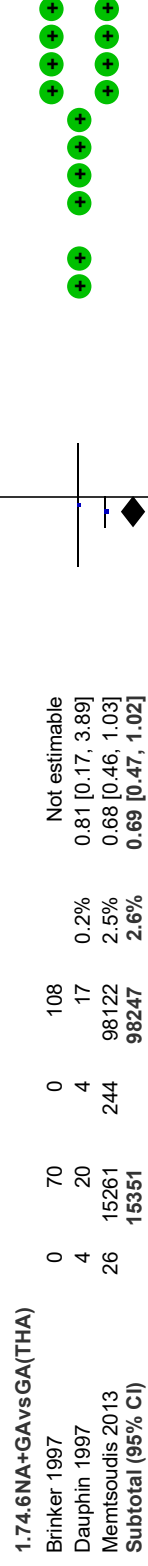

Total events 30 248  
 Heterogeneity: Chi<sup>2</sup> = 0.04, df = 1 (P = 0.84); I<sup>2</sup> = 0%  
 Test for overall effect: Z = 1.84 (P = 0.07)

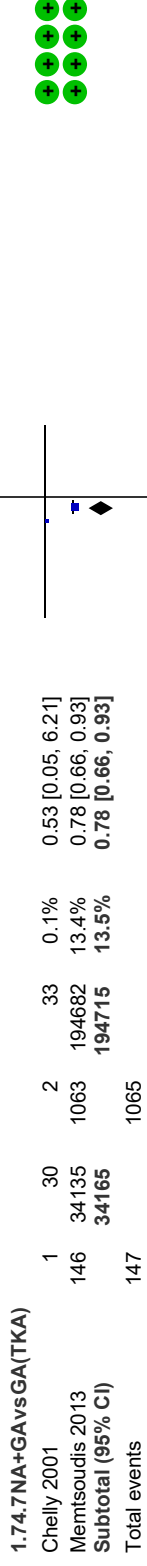

Total events 147 1065  
 Heterogeneity: Chi<sup>2</sup> = 0.09, df = 1 (P = 0.76); I<sup>2</sup> = 0%  
 Test for overall effect: Z = 2.80 (P = 0.005)

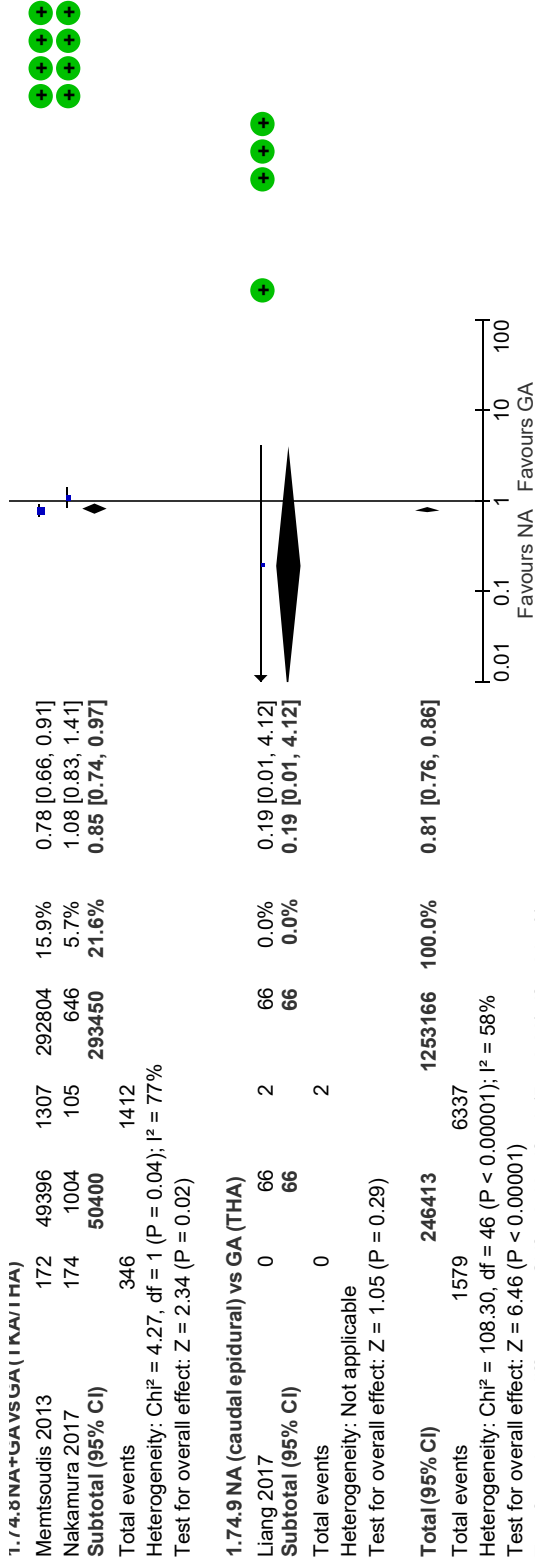

Risk of bias legend

- (A) Random sequence generation (selection bias)
- (B) Allocation concealment (selection bias)
- (C) Blinding of participants and personnel (performance bias)
- (D) Blinding of outcome assessment (detection bias)
- (E) Incomplete outcome data (attrition bias)
- (F) Selective reporting (reporting bias)
- (G) Other bias
- (H) Observational Study: Incomplete follow-up
- (I) Observational Study: Failure to develop and apply appropriate...
- (J) Observational Study: Flawed measurement of exposure or outcome
- (K) Observational Study: Failure to adequately control for confounding

(1) popliteal and femoral



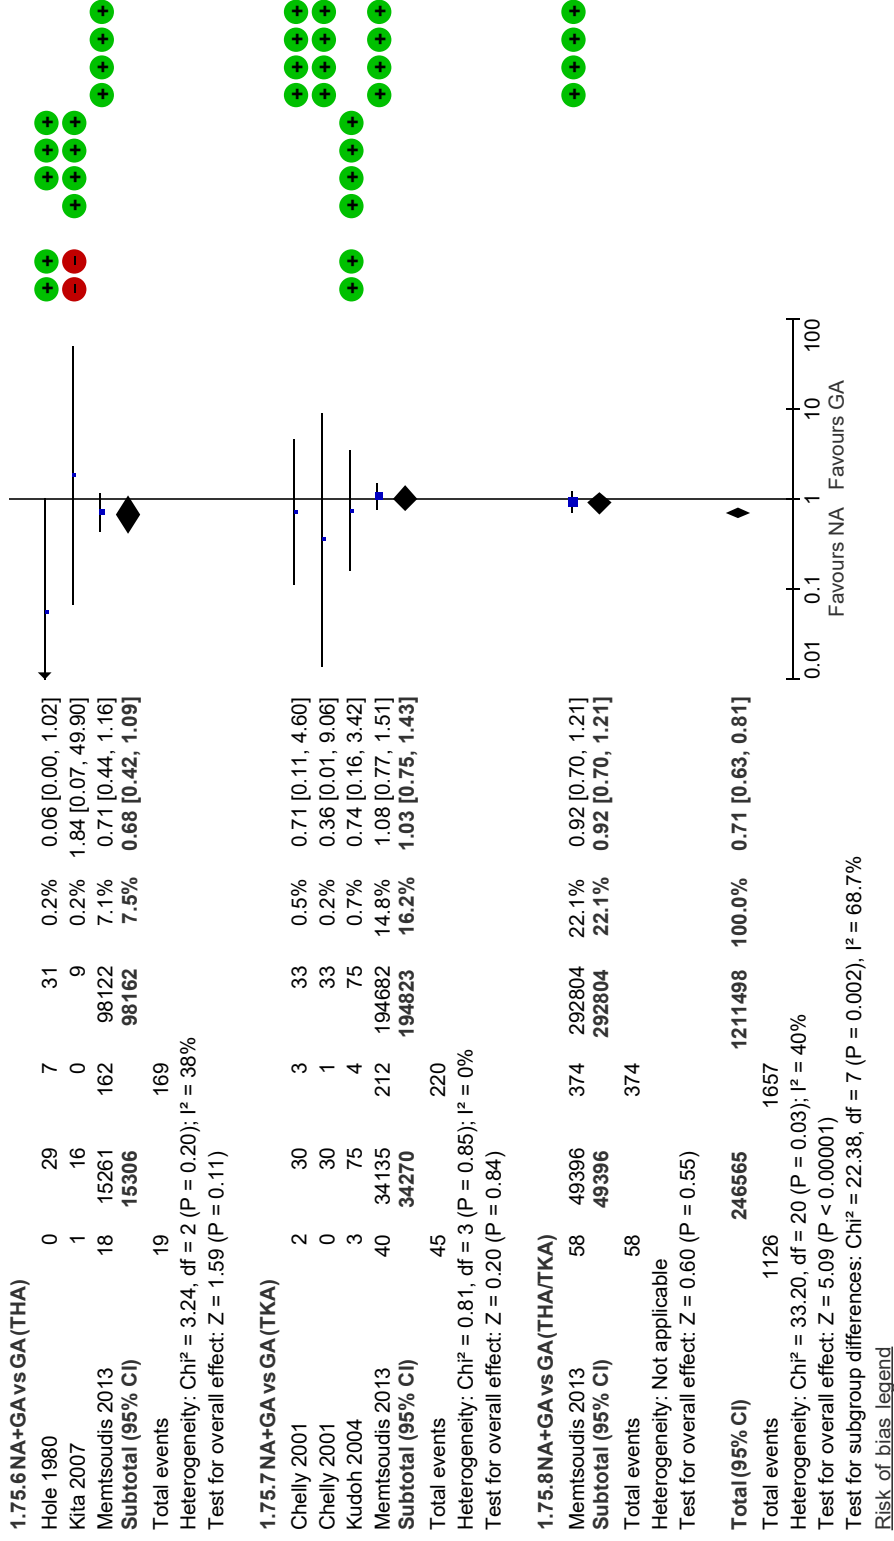

Risk of bias legend

- (A) Random sequence generation (selection bias)
- (B) Allocation concealment (selection bias)
- (C) Blinding of participants and personnel (performance bias)
- (D) Blinding of outcome assessment (detection bias)
- (E) Incomplete outcome data (attrition bias)
- (F) Selective reporting (reporting bias)
- (G) Other bias
- (H) Observational Study: Incomplete follow-up
- (I) Observational Study: Failure to develop and apply appropriate eligibility criteria
- (J) Observational Study: Flawed measurement of exposure or outcome
- (K) Observational Study: Failure to adequately control for confounding

1.86 Stroke

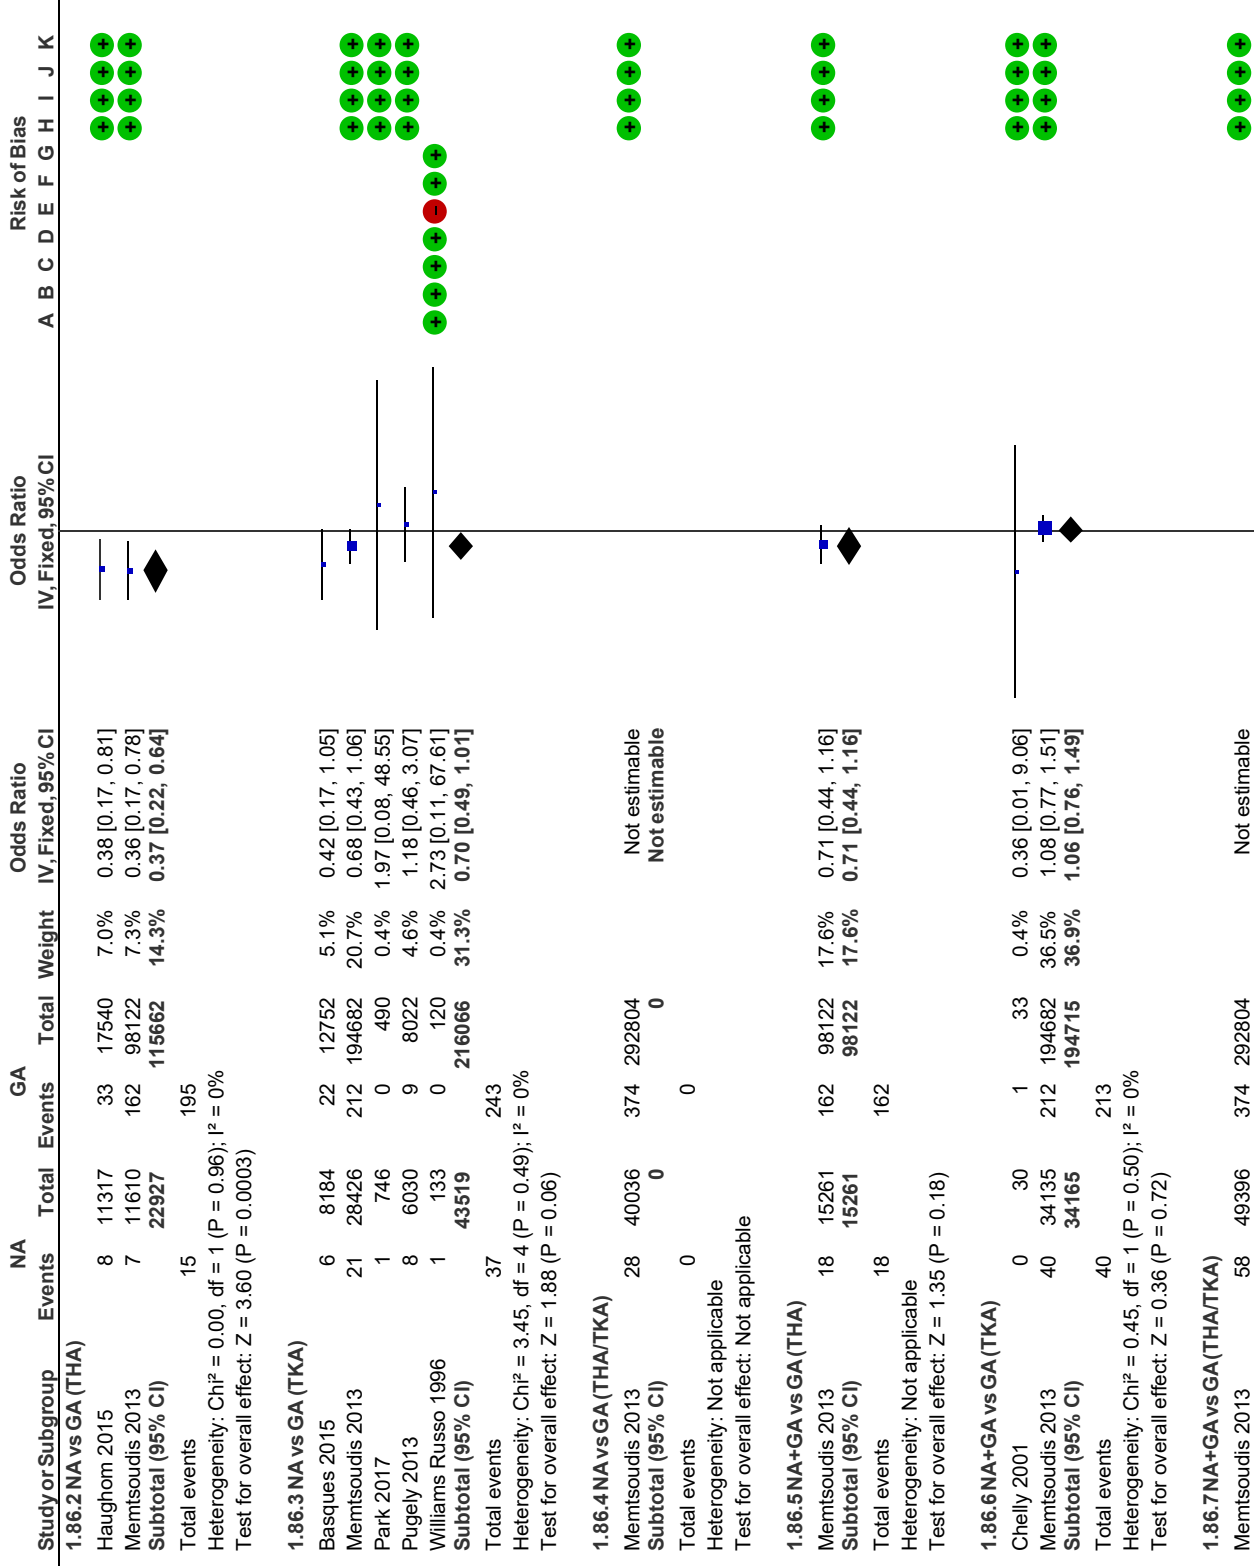

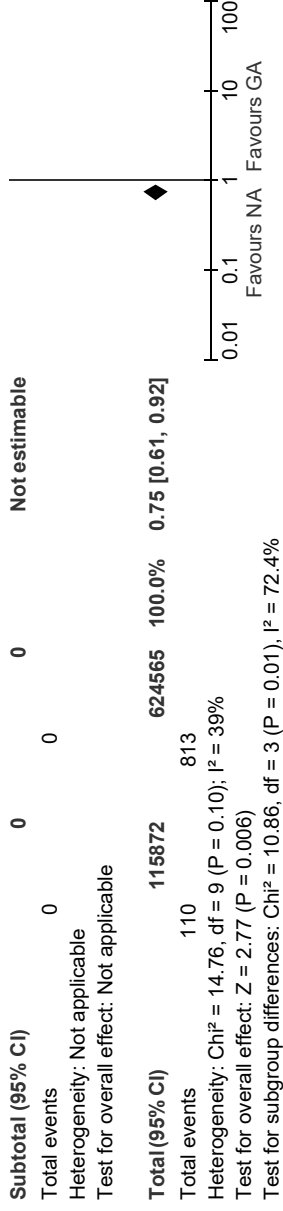

**Risk of bias legend**

- (A) Random sequence generation (selection bias)
- (B) Allocation concealment (selection bias)
- (C) Blinding of participants and personnel (performance bias)
- (D) Blinding of outcome assessment (detection bias)
- (E) Incomplete outcome data (attrition bias)
- (F) Selective reporting (reporting bias)
- (G) Other bias
- (H) Observational Study: Incomplete follow-up
- (I) Observational Study: Failure to develop and apply appropriate eligibility criteria
- (J) Observational Study: Flawed measurement of exposure or outcome
- (K) Observational Study: Failure to adequately control for confounding

1.88 All infections (including pneumonia and sepsis)

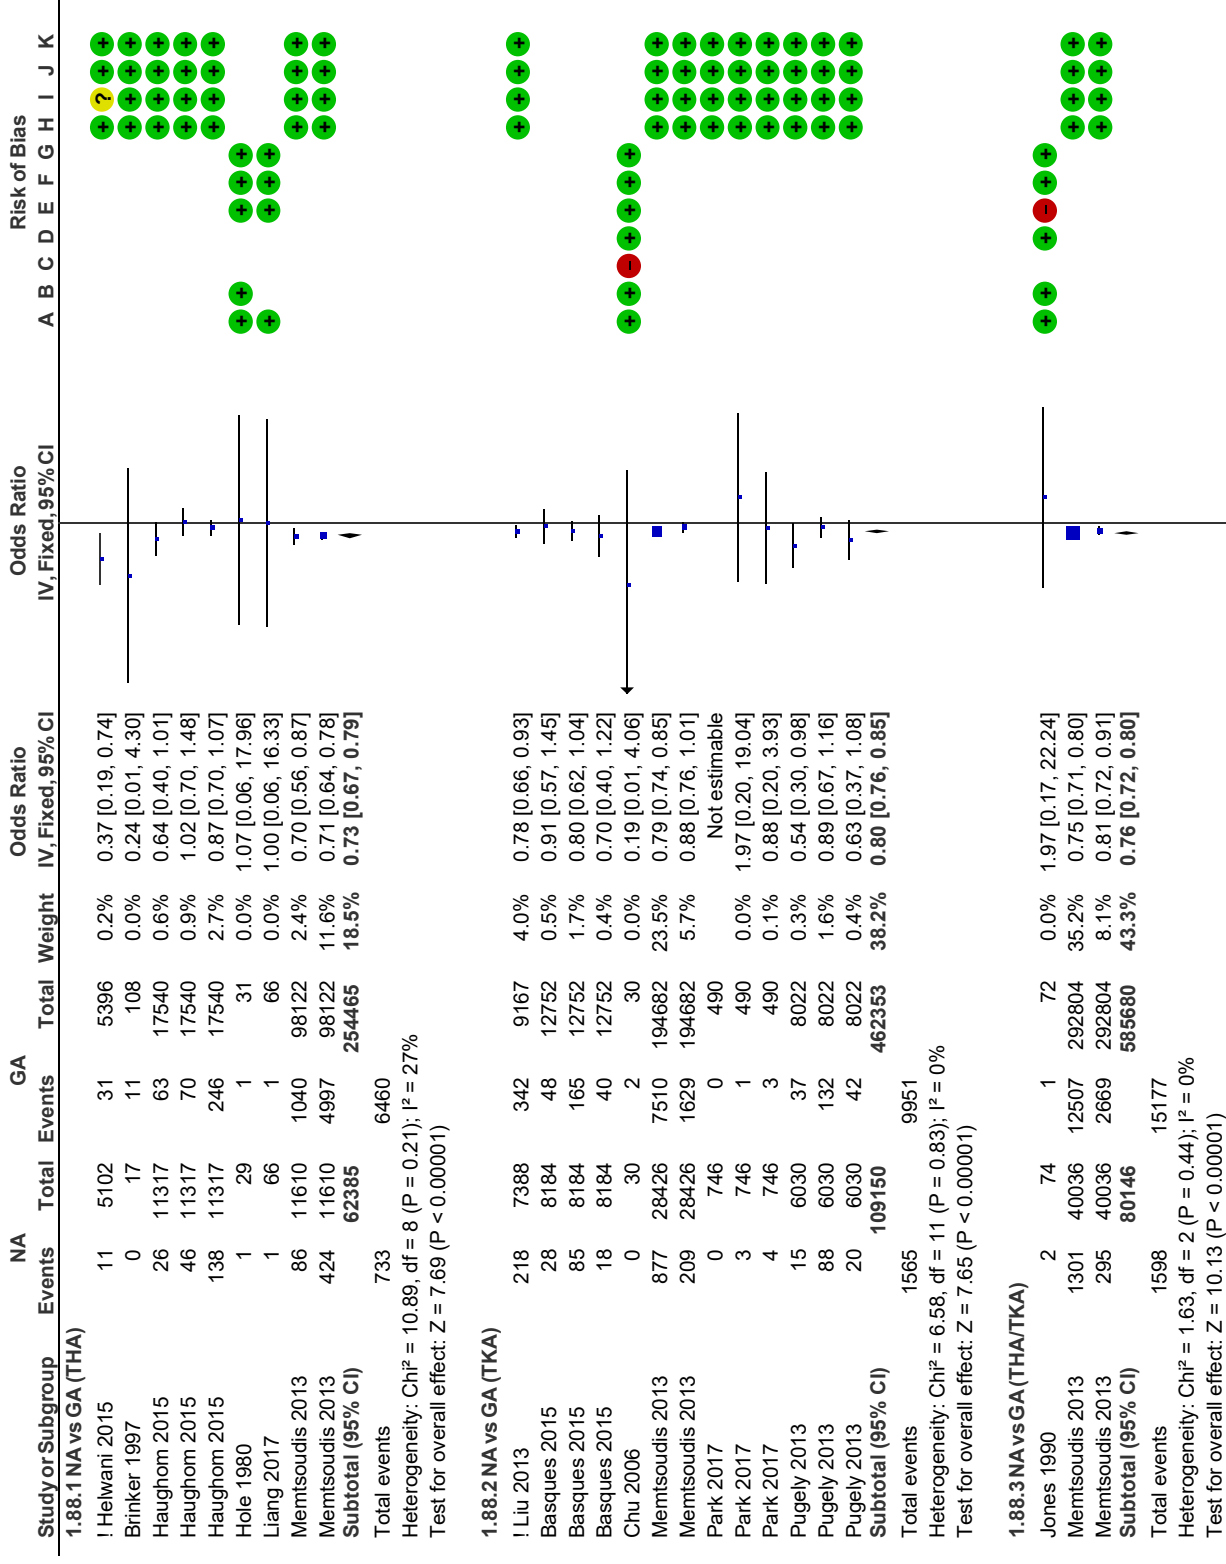

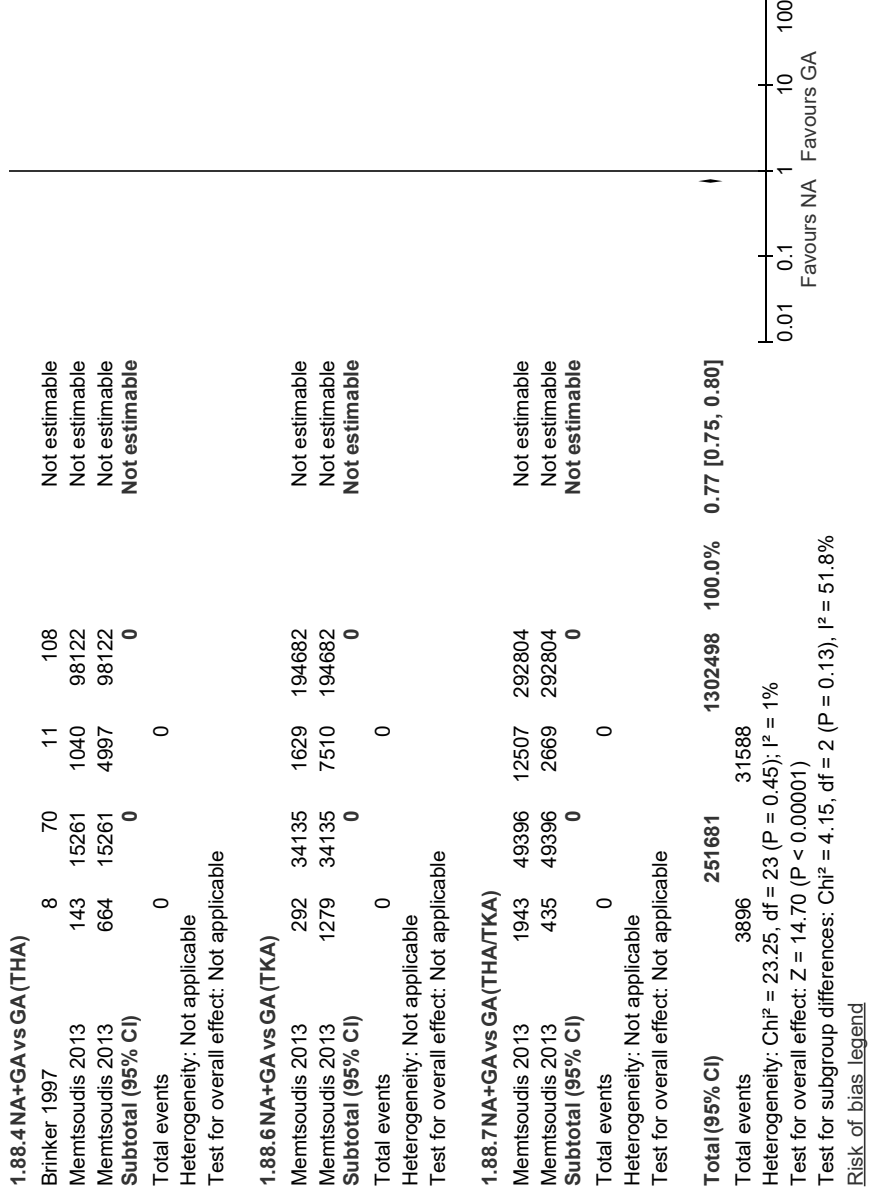



1.89 Wound complications | Superficial infection

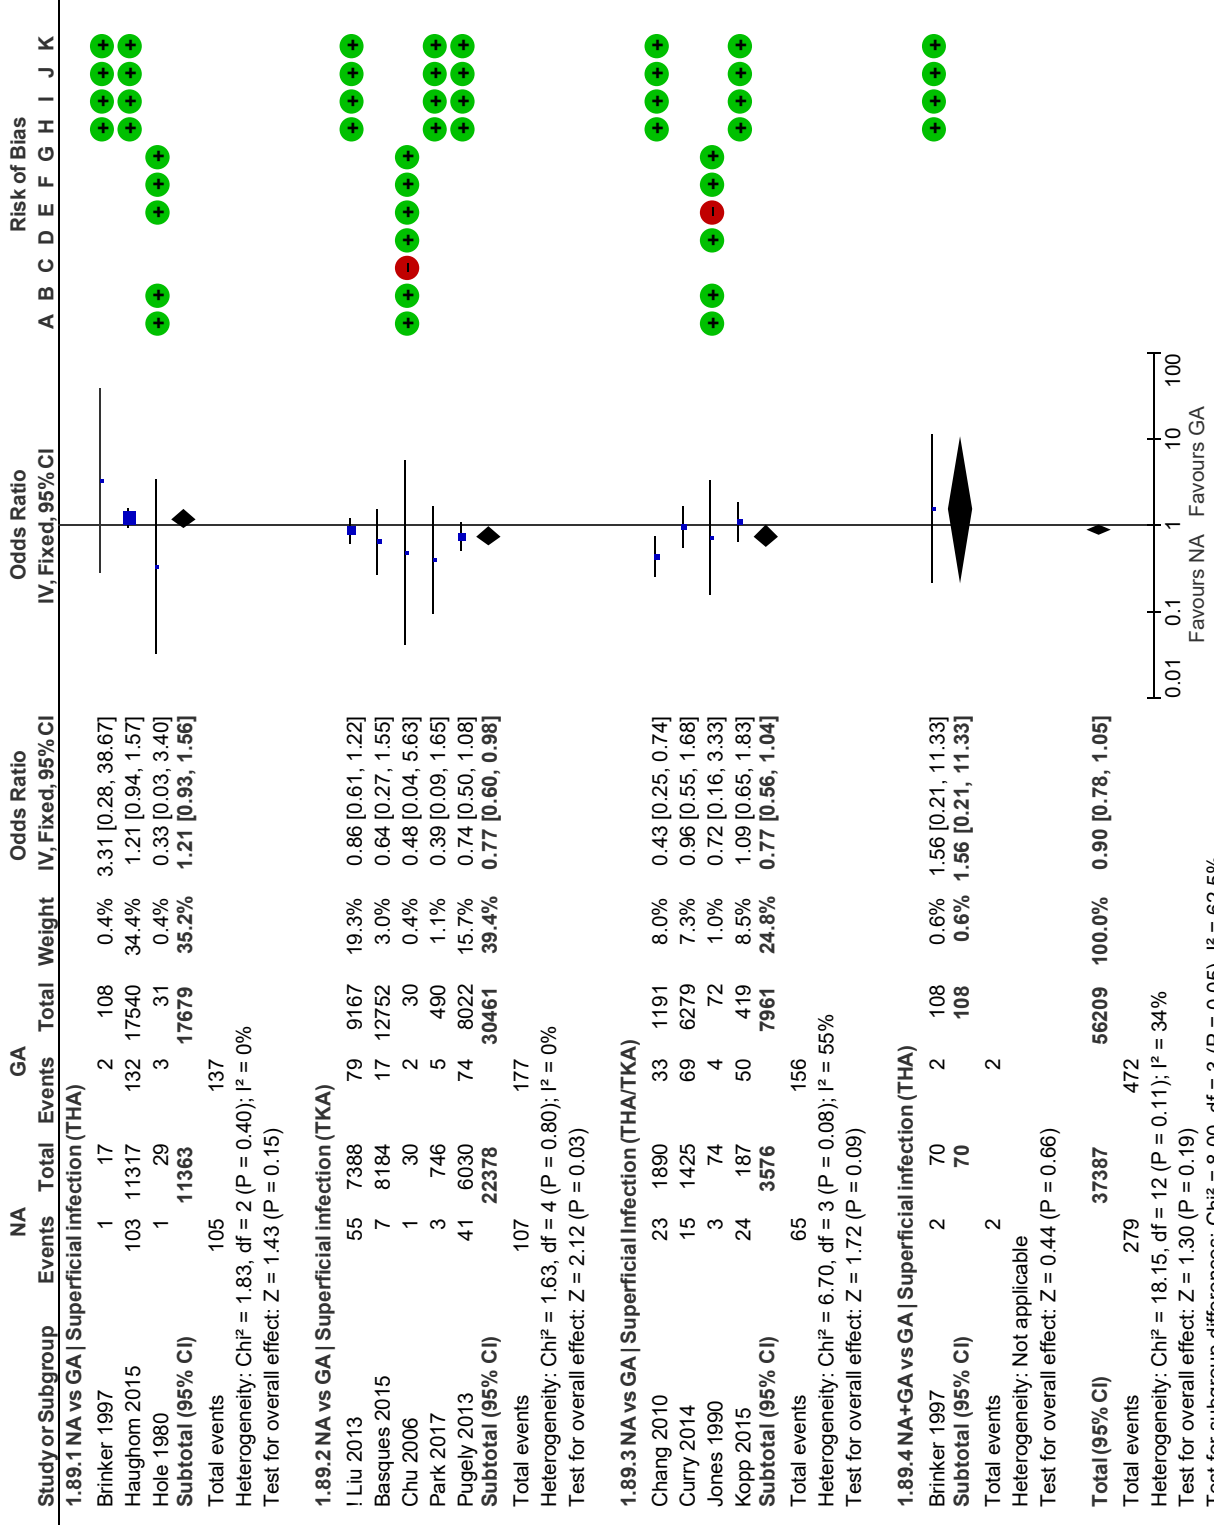

Risk of bias legend

- (A) Random sequence generation (selection bias)
- (B) Allocation concealment (selection bias)
- (C) Blinding of participants and personnel (performance bias)
- (D) Blinding of outcome assessment (detection bias)
- (E) Incomplete outcome data (attrition bias)
- (F) Selective reporting (reporting bias)
- (G) Other bias
- (H) Observational Study: Incomplete follow-up
- (I) Observational Study: Failure to develop and apply appropriate eligibility criteria
- (J) Observational Study: Flawed measurement of exposure or outcome
- (K) Observational Study: Failure to adequately control for confounding

1.90 Wound complications | Deep infection

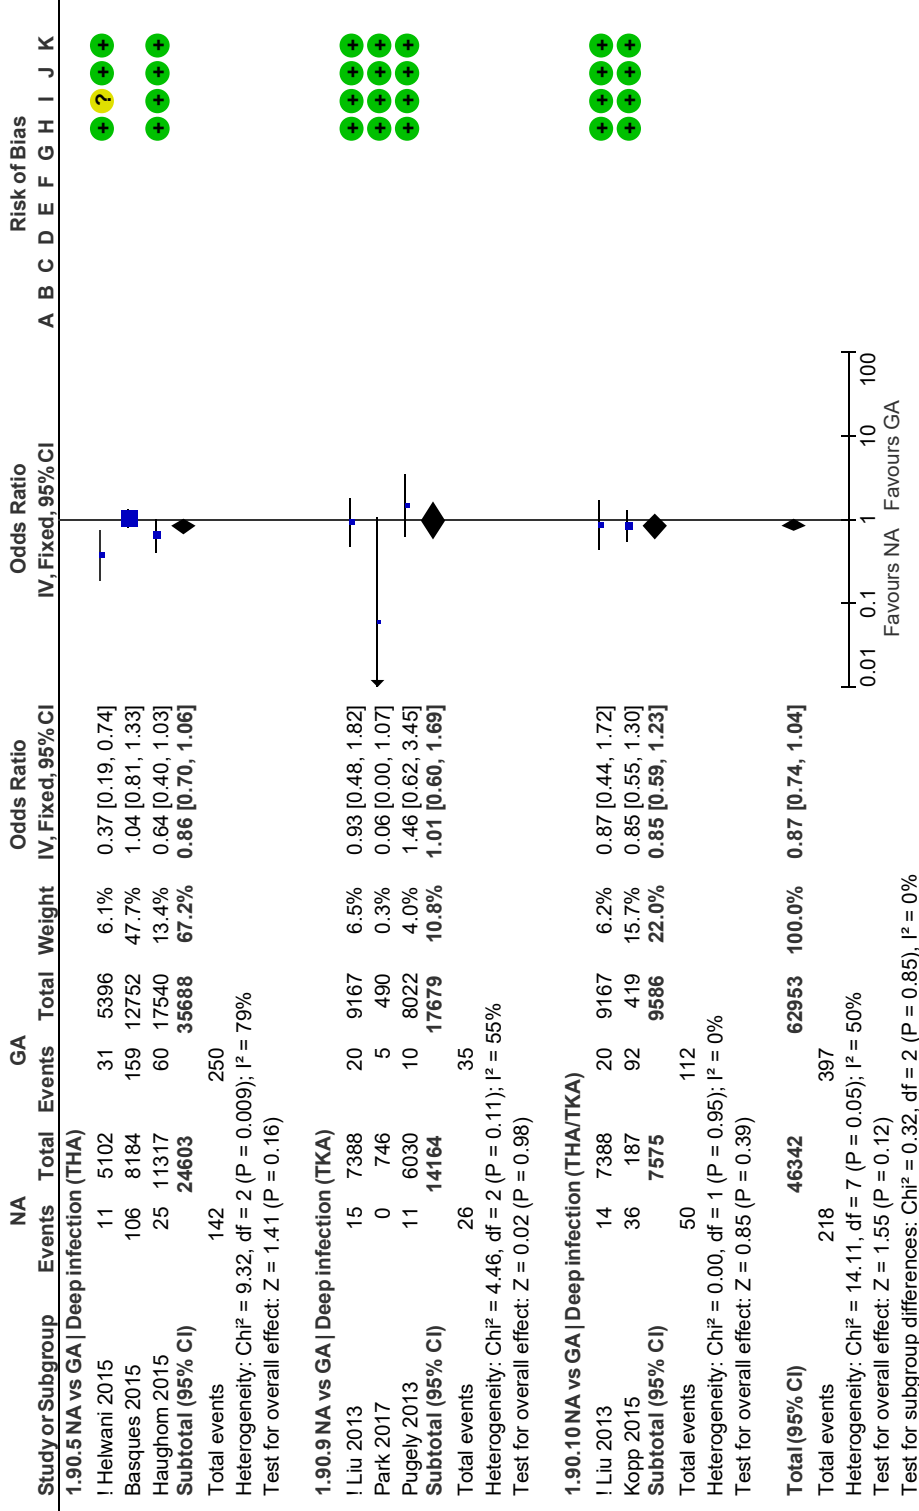

Risk of bias legend

- (A) Random sequence generation (selection bias)
- (B) Allocation concealment (selection bias)
- (C) Blinding of participants and personnel (performance bias)
- (D) Blinding of outcome assessment (detection bias)
- (E) Incomplete outcome data (attrition bias)
- (F) Selective reporting (reporting bias)
- (G) Other bias
- (H) Observational Study: Incomplete follow-up
- (I) Observational Study: Failure to develop and apply appropriate eligibility criteria
- (J) Observational Study: Flawed measurement of exposure or outcome
- (K) Observational Study: Failure to adequately control for confounding



1.91 Blood transfusion

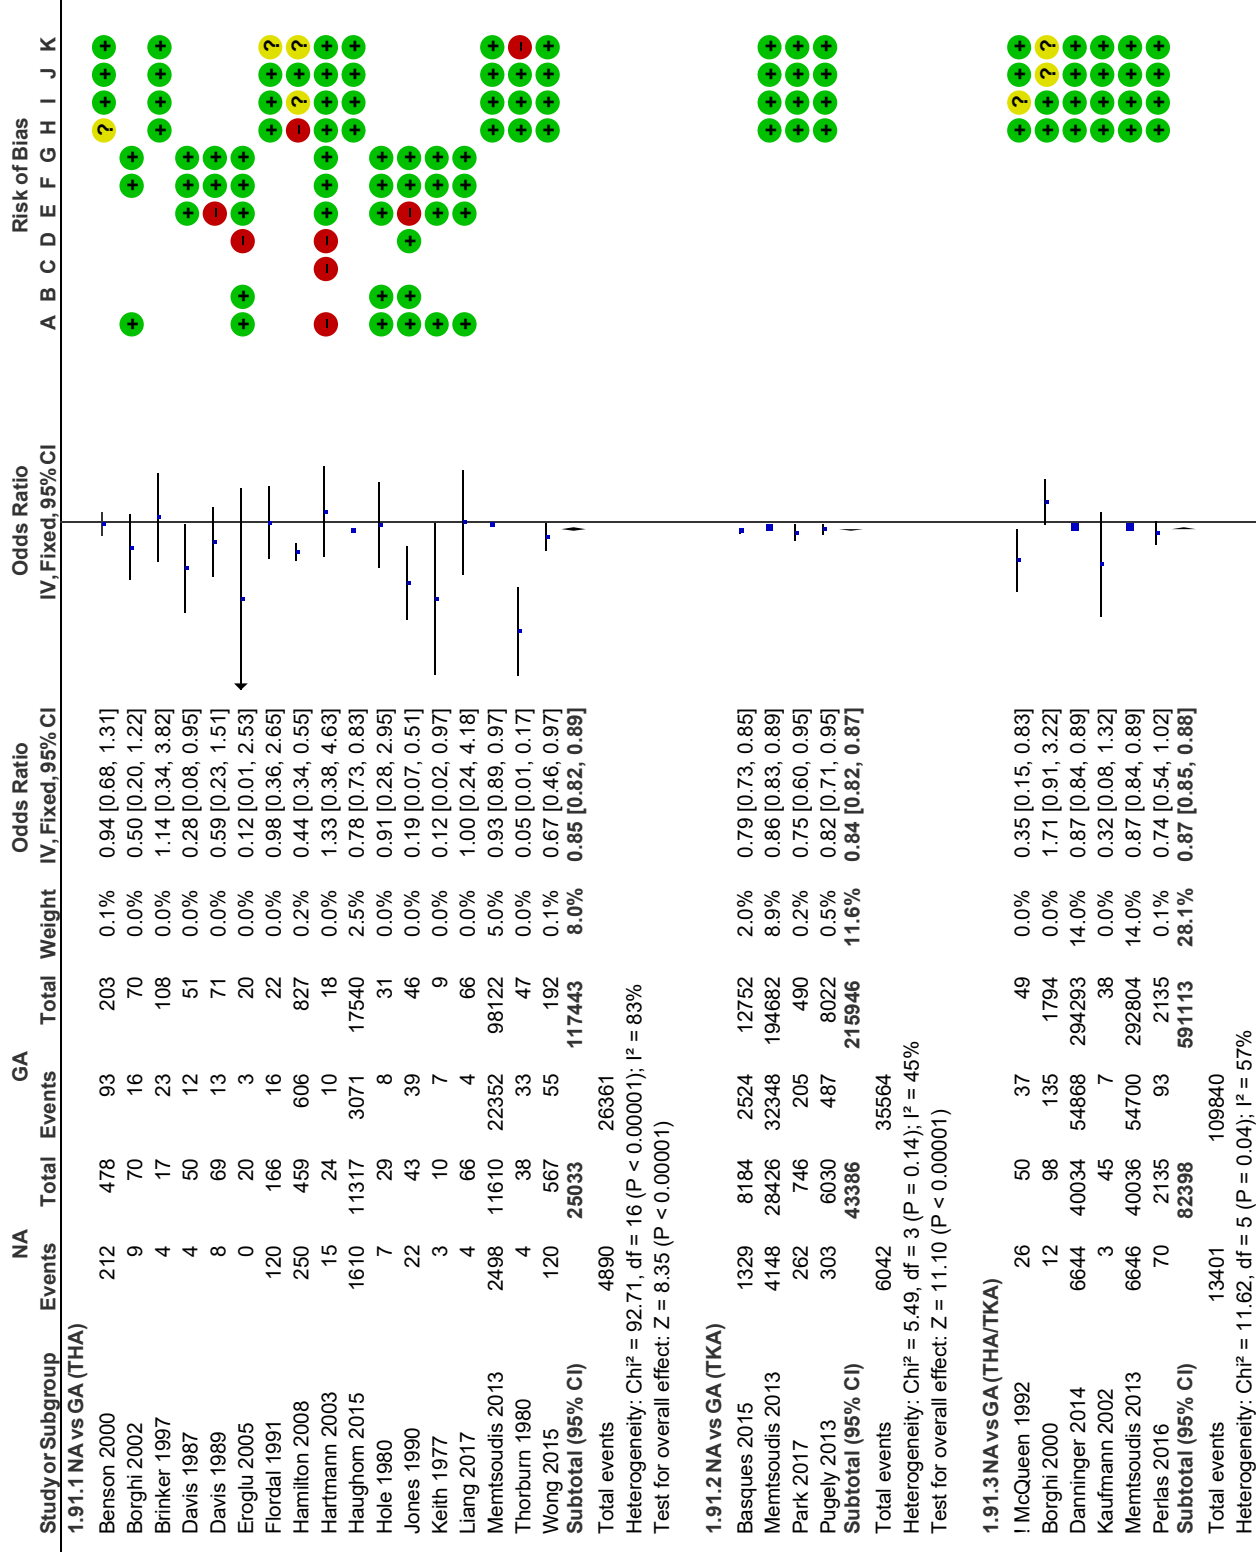

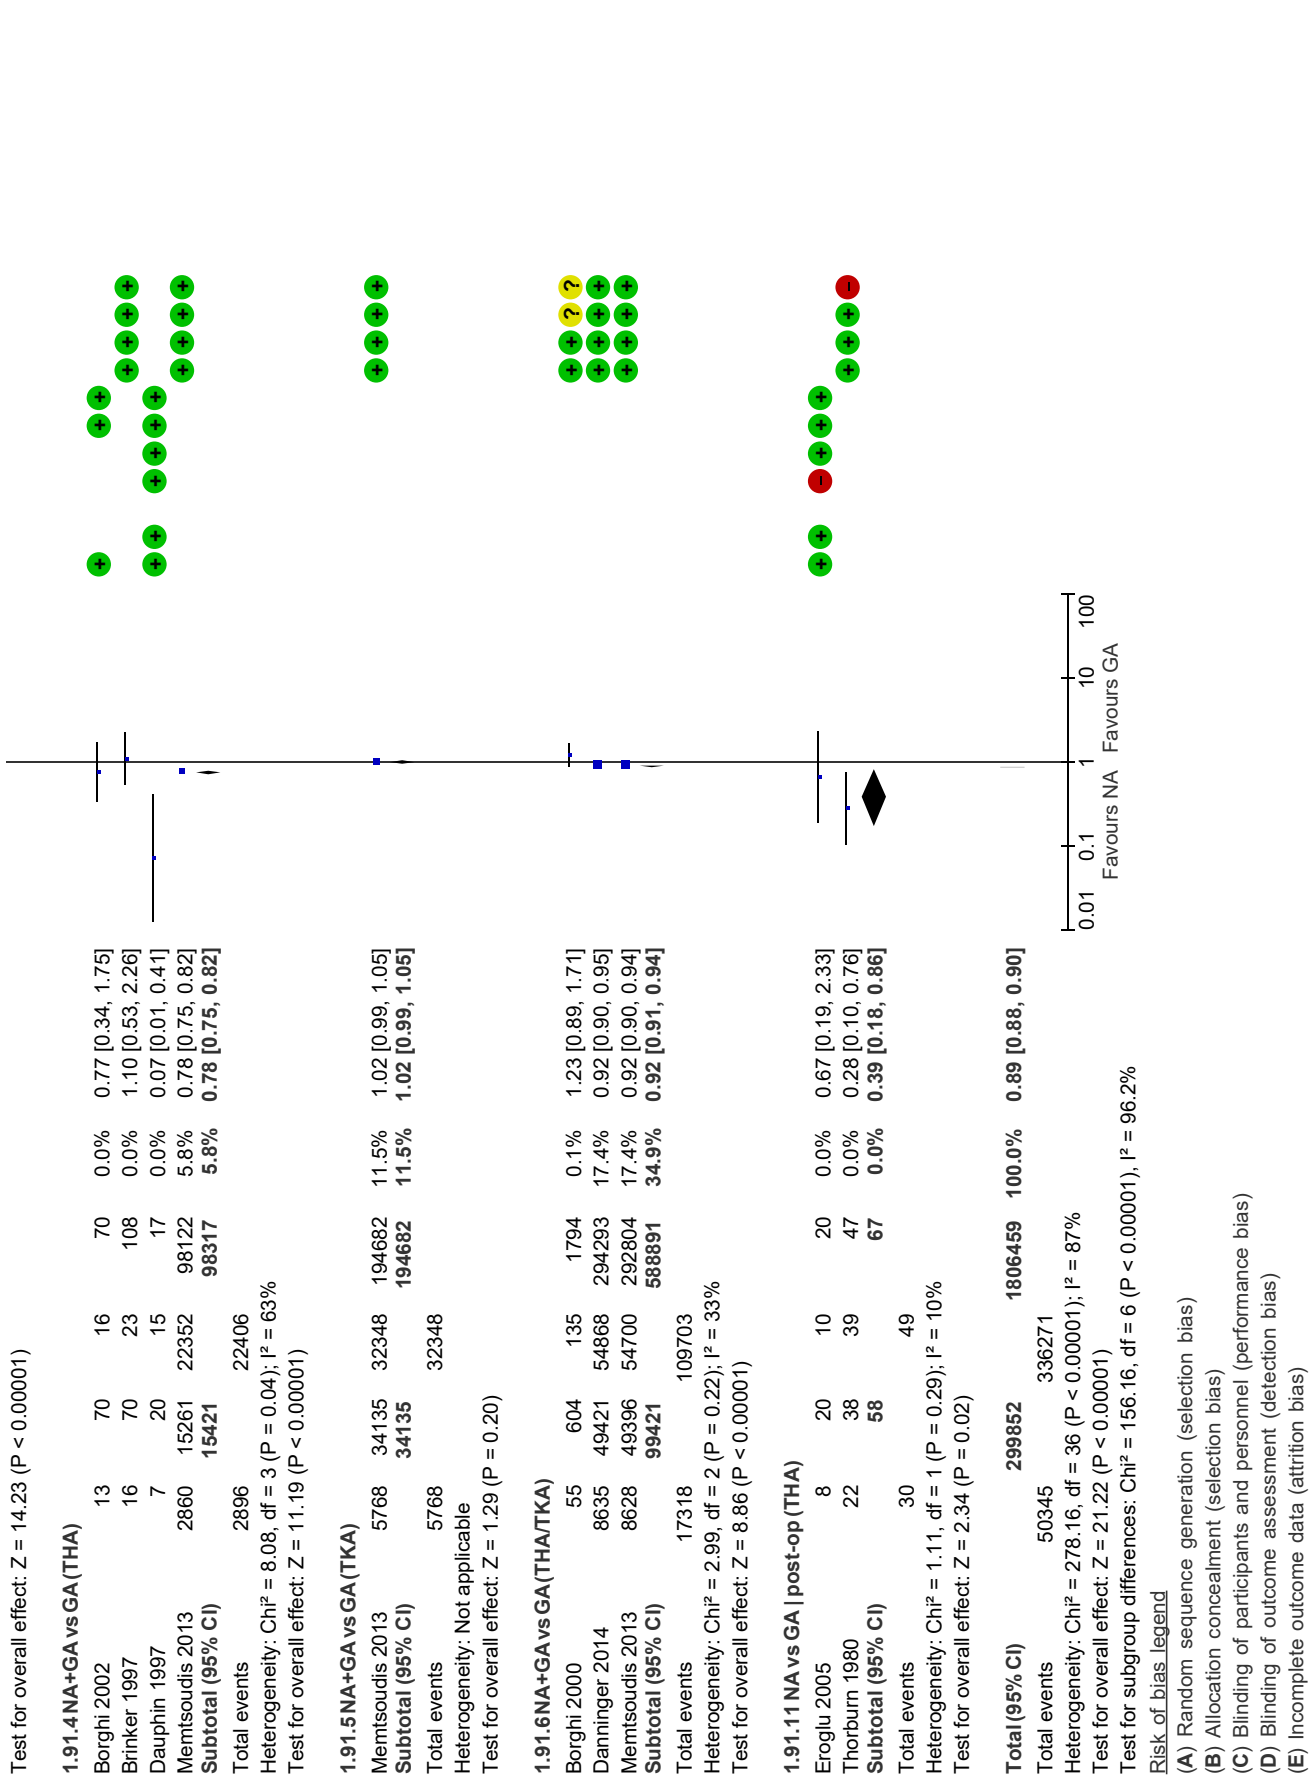

- (F) Selective reporting (reporting bias)
- (G) Other bias
- (H) Observational Study: Incomplete follow-up
- (I) Observational Study: Failure to develop and apply appropriate eligibility criteria
- (J) Observational Study: Flawed measurement of exposure or outcome
- (K) Observational Study: Failure to adequately control for confounding

1.100 Critical care admission

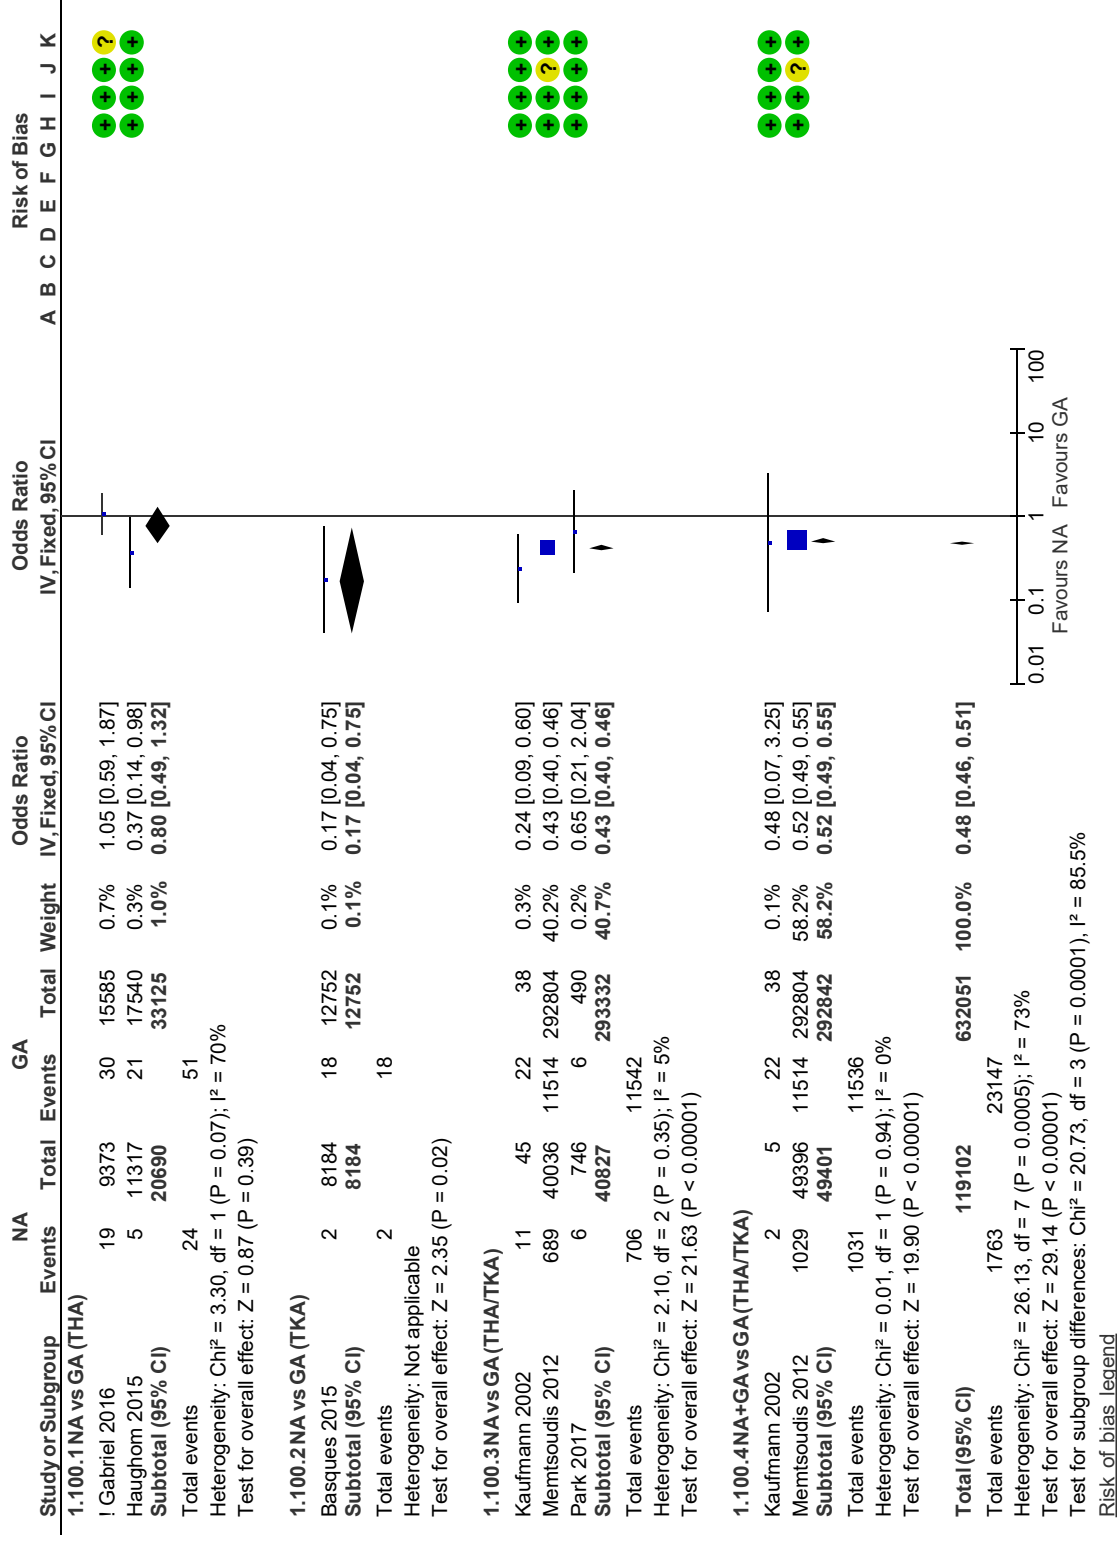

Risk of bias legend

- (A) Random sequence generation (selection bias)
- (B) Allocation concealment (selection bias)
- (C) Blinding of participants and personnel (performance bias)
- (D) Blinding of outcome assessment (detection bias)
- (E) Incomplete outcome data (attrition bias)



- (F) Selective reporting (reporting bias)
- (G) Other bias
- (H) Observational Study: Incomplete follow-up
- (I) Observational Study: Failure to develop and apply appropriate eligibility criteria
- (J) Observational Study: Flawed measurement of exposure or outcome
- (K) Observational Study: Failure to adequately control for confounding

1.109 Readmission

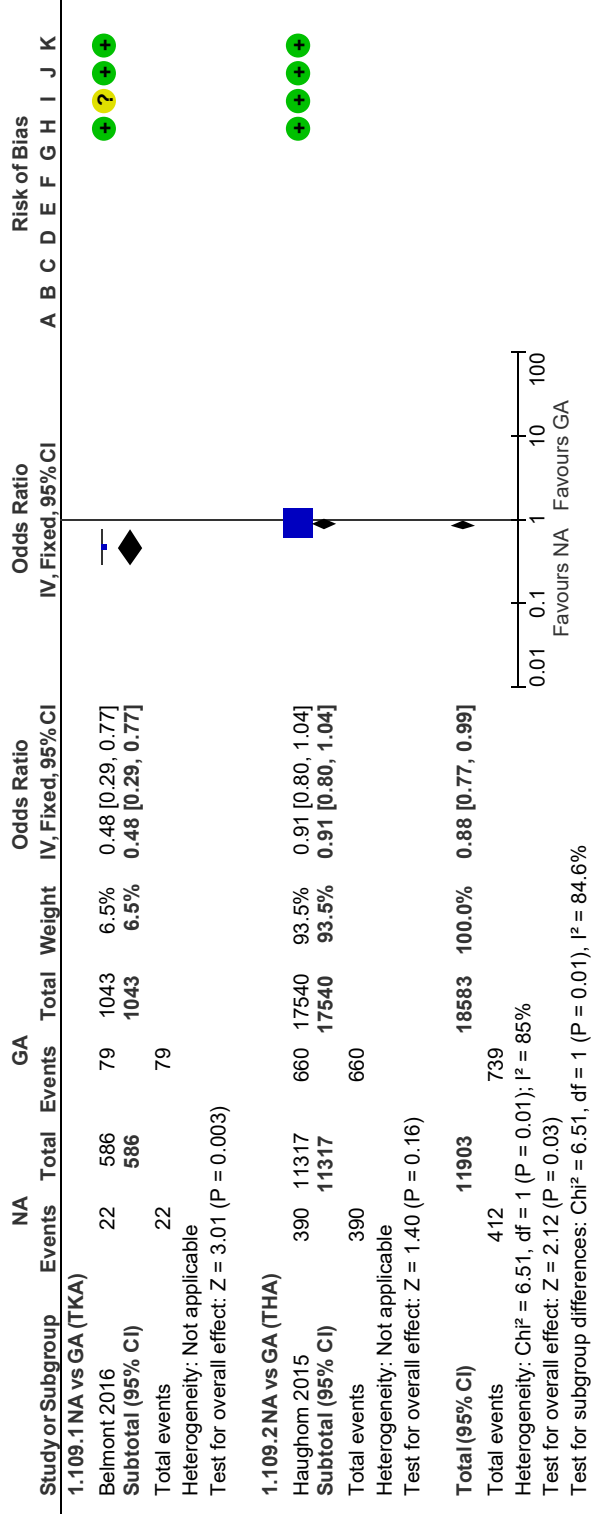

Risk of bias legend

- (A) Random sequence generation (selection bias)
- (B) Allocation concealment (selection bias)
- (C) Blinding of participants and personnel (performance bias)
- (D) Blinding of outcome assessment (detection bias)
- (E) Incomplete outcome data (attrition bias)
- (F) Selective reporting (reporting bias)
- (G) Other bias
- (H) Observational Study: Incomplete follow-up
- (I) Observational Study: Failure to develop and apply appropriate eligibility criteria
- (J) Observational Study: Flawed measurement of exposure or outcome
- (K) Observational Study: Failure to adequately control for confounding

1.113 Perioperative Nerve Injury

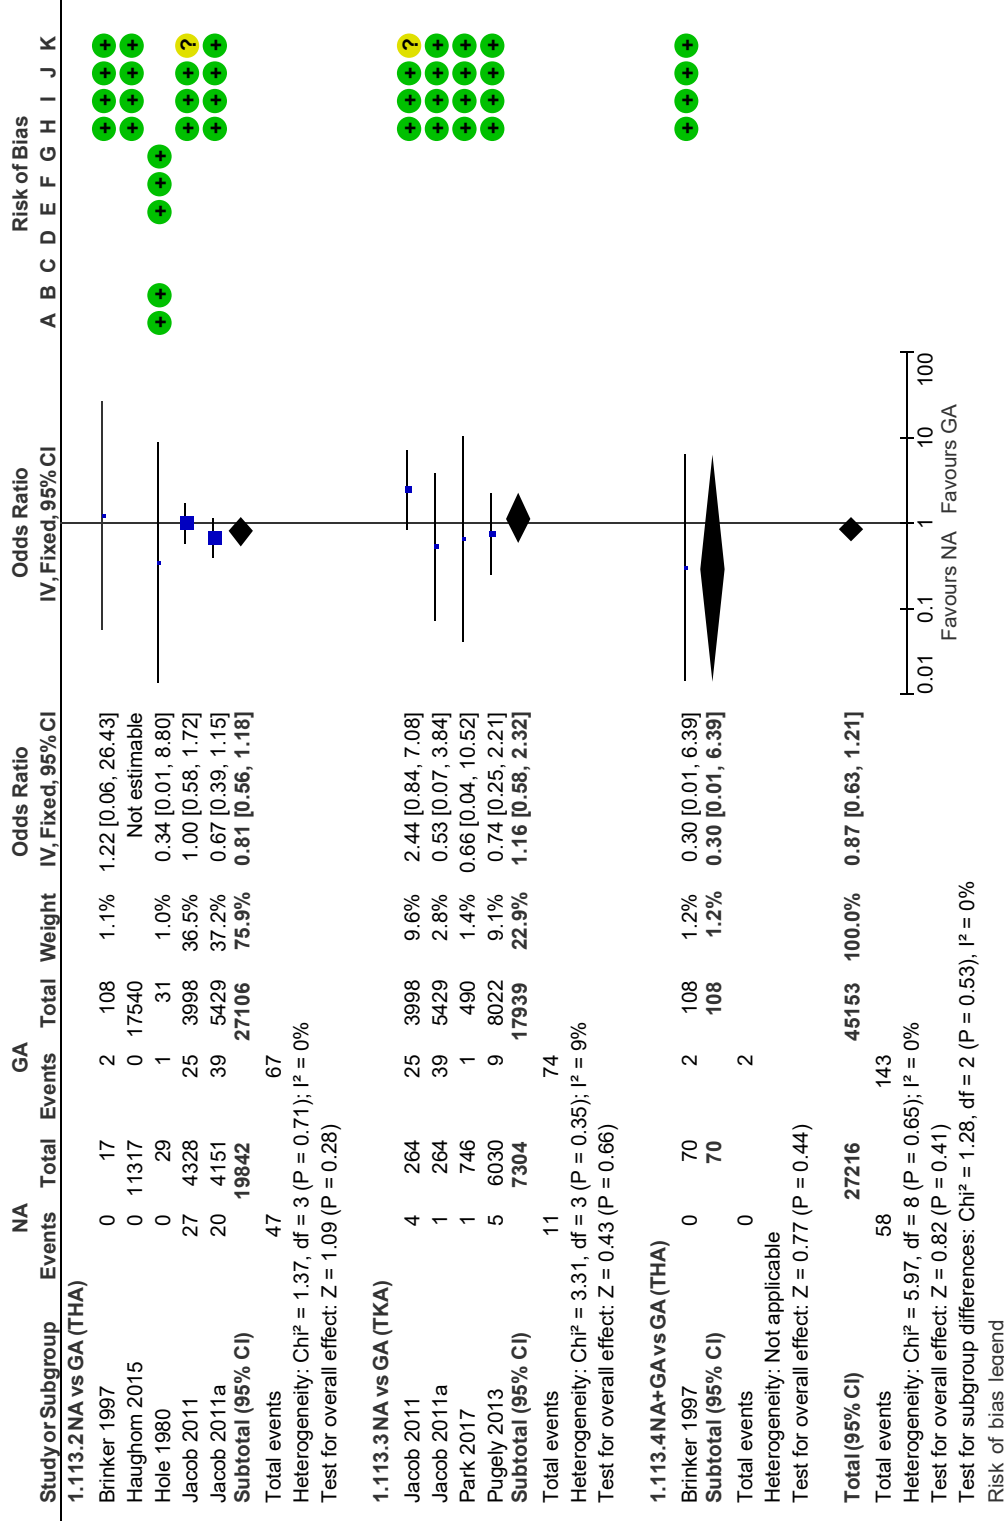

- (J) Observational Study: Flawed measurement of exposure or outcome
- (K) Observational Study: Failure to adequately control for confounding

1.117 Falls

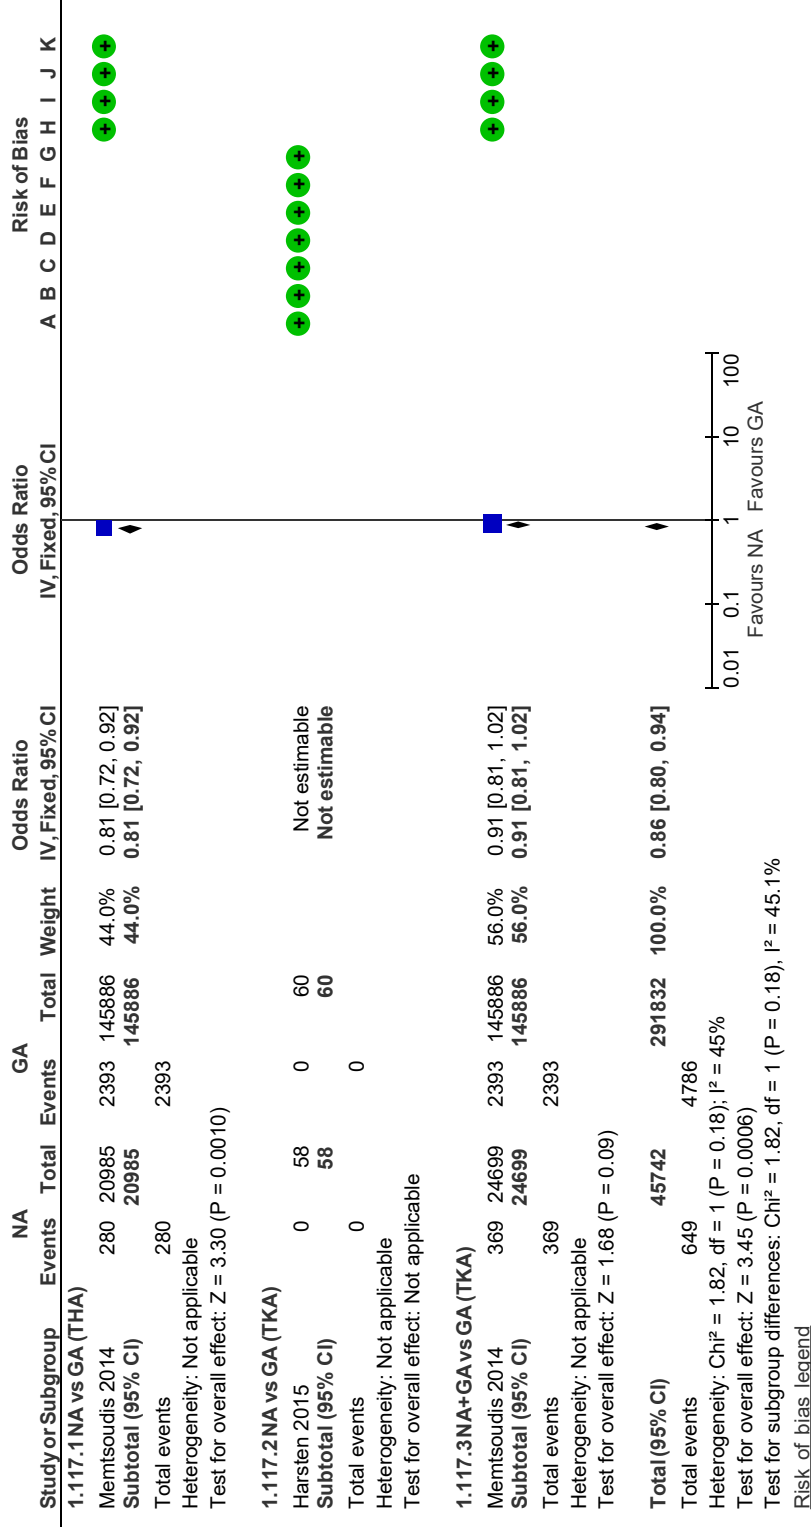

- Risk of bias legend
- (A) Random sequence generation (selection bias)
  - (B) Allocation concealment (selection bias)
  - (C) Blinding of participants and personnel (performance bias)
  - (D) Blinding of outcome assessment (detection bias)
  - (E) Incomplete outcome data (attrition bias)
  - (F) Selective reporting (reporting bias)
  - (G) Other bias
  - (H) Observational Study: Incomplete follow-up
  - (I) Observational Study: Failure to develop and apply appropriate eligibility criteria
  - (J) Observational Study: Flawed measurement of exposure or outcome
  - (K) Observational Study: Failure to adequately control for confounding
